# Supplementary material
Source: publisher figshare collection journal article supplement (https://frontiersin.figshare.com/ndownloader/files/18946607)
Supplement: Supplementary file 7 [file 18946607]

**Brcc36**

100

- 63 ● Brcc36 *Gasterosteus aculeatus*
- 78 ▽ Brcc36 *Tetraodon nigroviridis*
- 65 ▼ Brcc36 *Oryzia latipes*
- 70 ◆ Brcc36 *Kryptolebias marmoratus*
- Brcc36 *Danio rerio*
- 96 △ Brcc36 *Ictalurus punctatus*
- 99 ■ Brcc36 *Homo sapiens*
- Brcc36 *Mus musculus*
- 95 ◇ Brcc36 *Xenopus tropicalis*
- 48 ▲ Brcc36 *Gallus gallus*

**Mysm1**

- 81 ■ Mysm1 *Homo sapiens*
- 99 □ Mysm1 *Mus musculus*
- ▲ Mysm1 *Gallus gallus*
- ◇ Mysm1 *Xenopus tropicalis*
- 99 ○ Mysm1 *Danio rerio*
- △ Mysm1 *Ictalurus punctatus*
- 83 ● Mysm1 *Gasterosteus aculeatus*
- 96 ◆ Mysm1 *Kryptolebias marmoratus*
- 75 ▽ Mysm1 *Tetraodon nigroviridis*

10
