# Supplementary material
Source: publisher figshare collection journal article supplement (https://frontiersin.figshare.com/ndownloader/files/18946607)

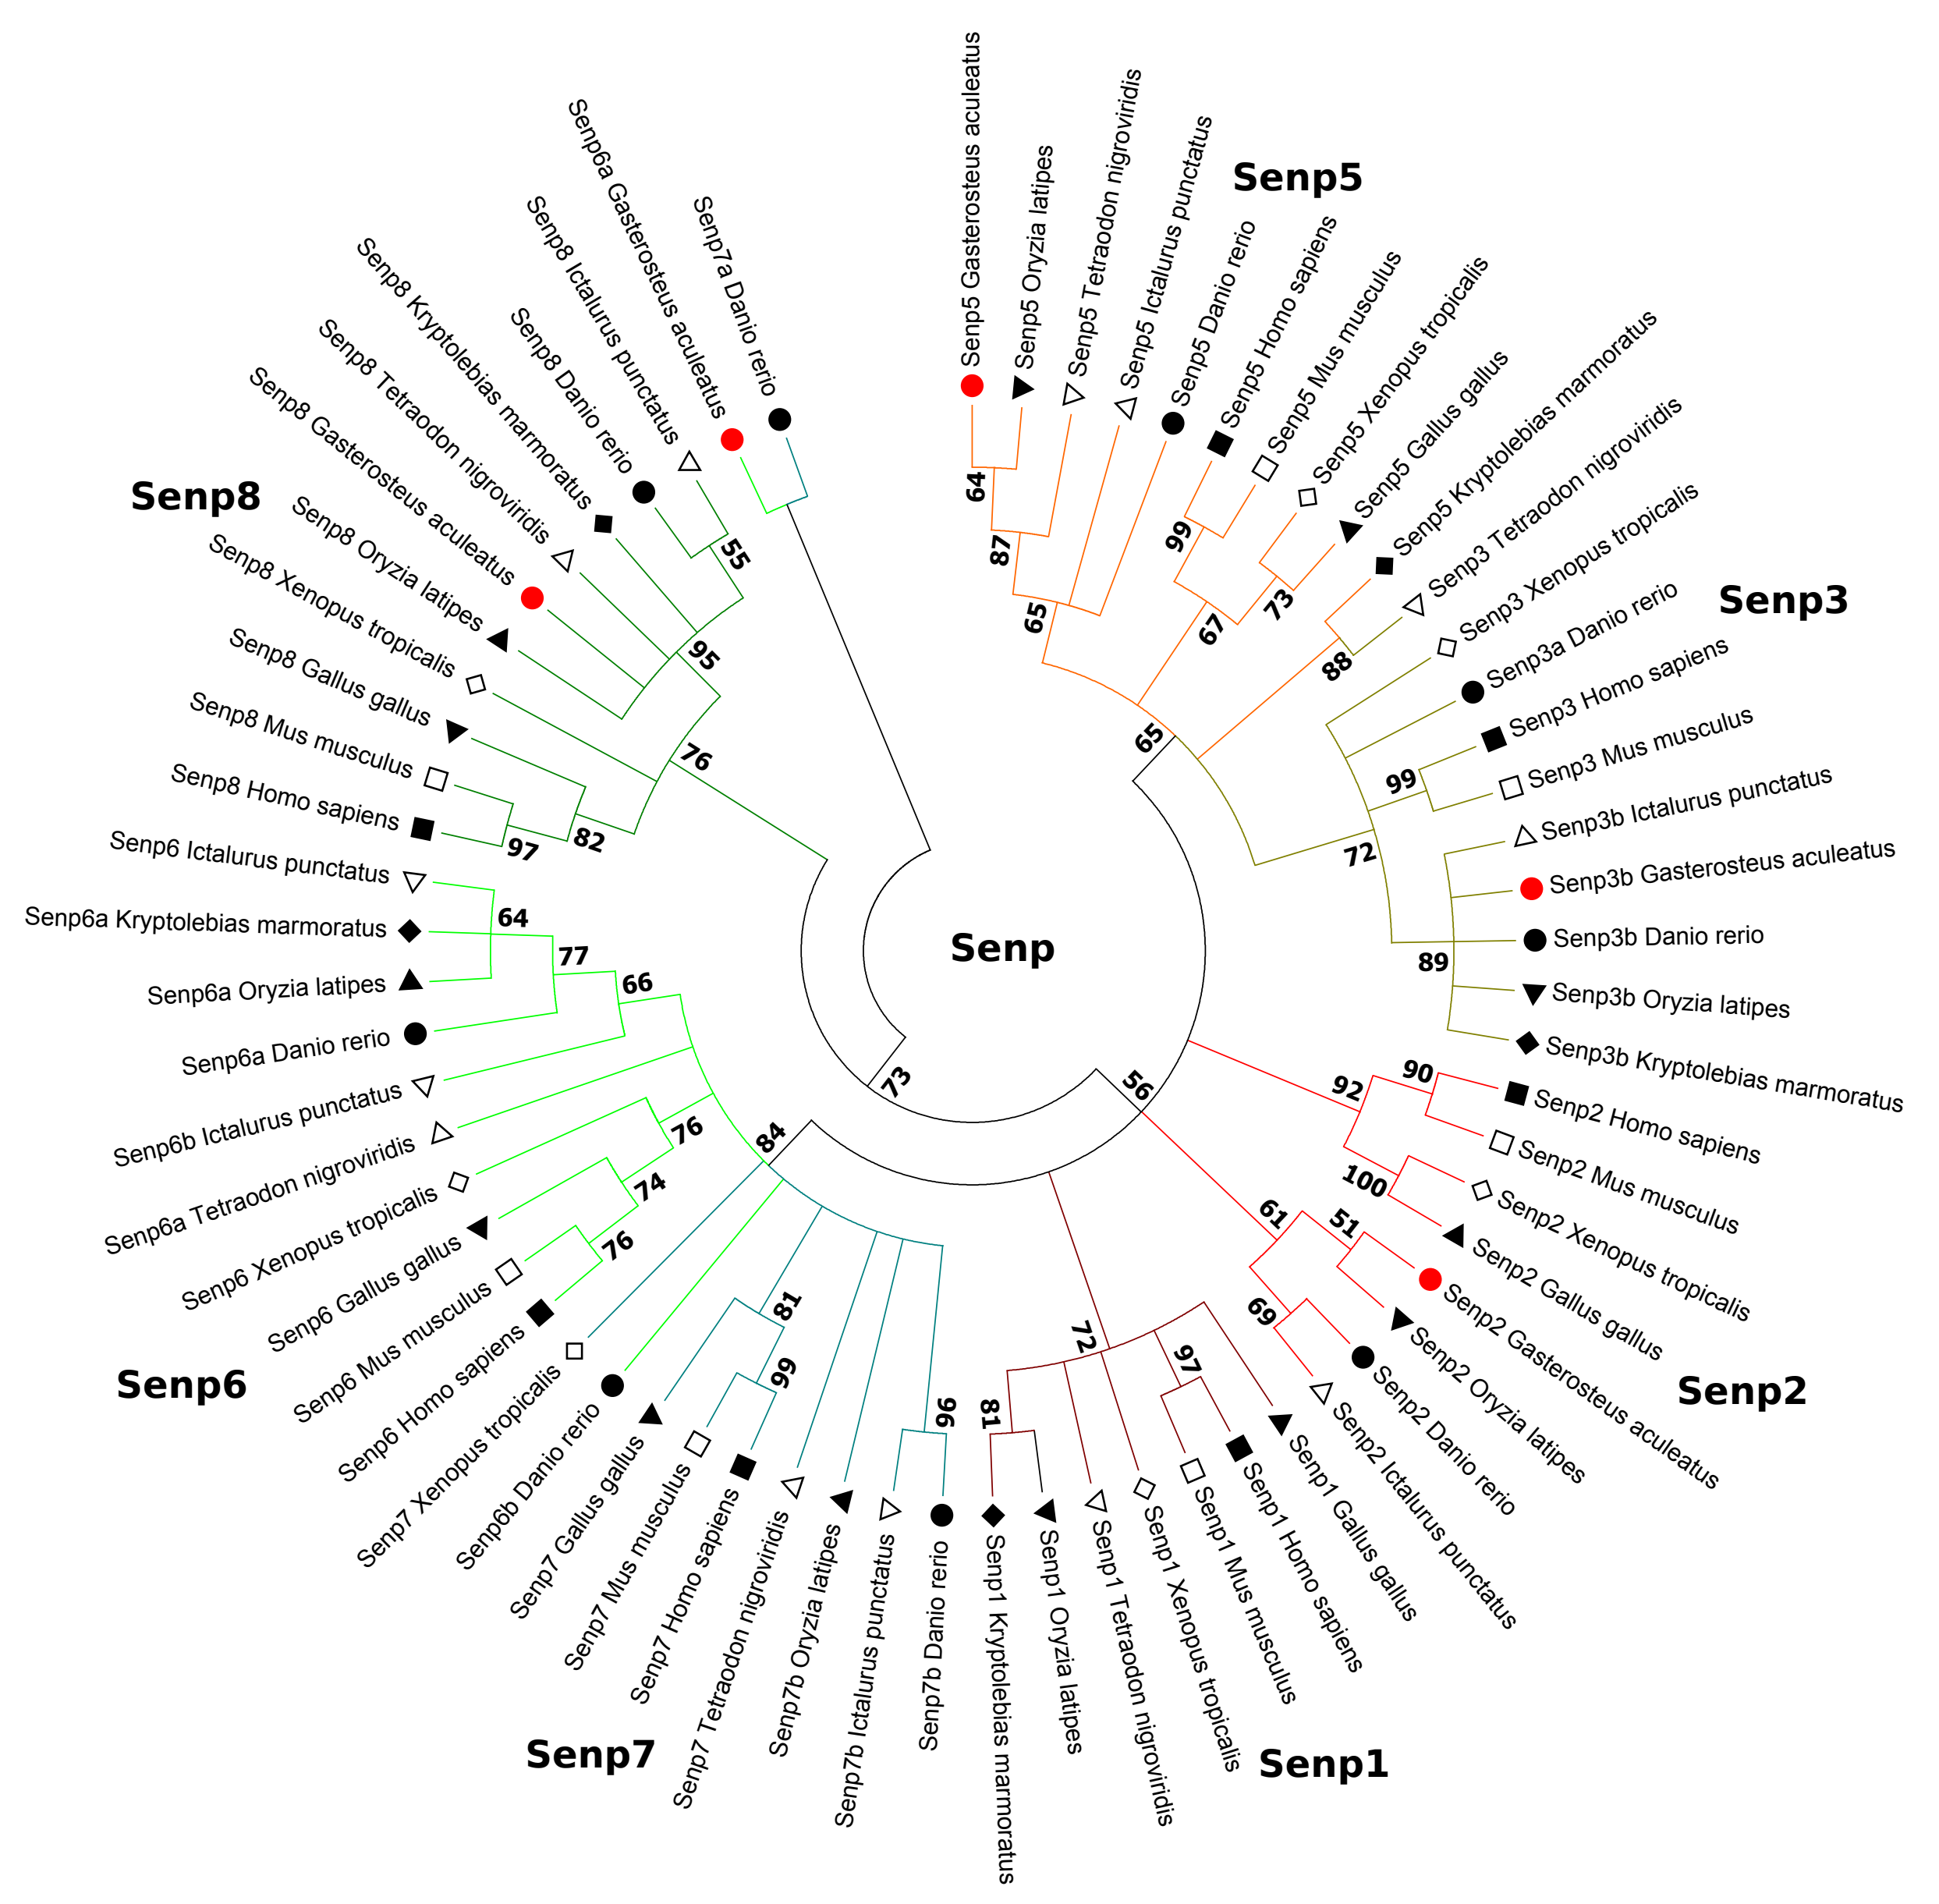

Supplement: Supplementary file 1 [file 18946607]

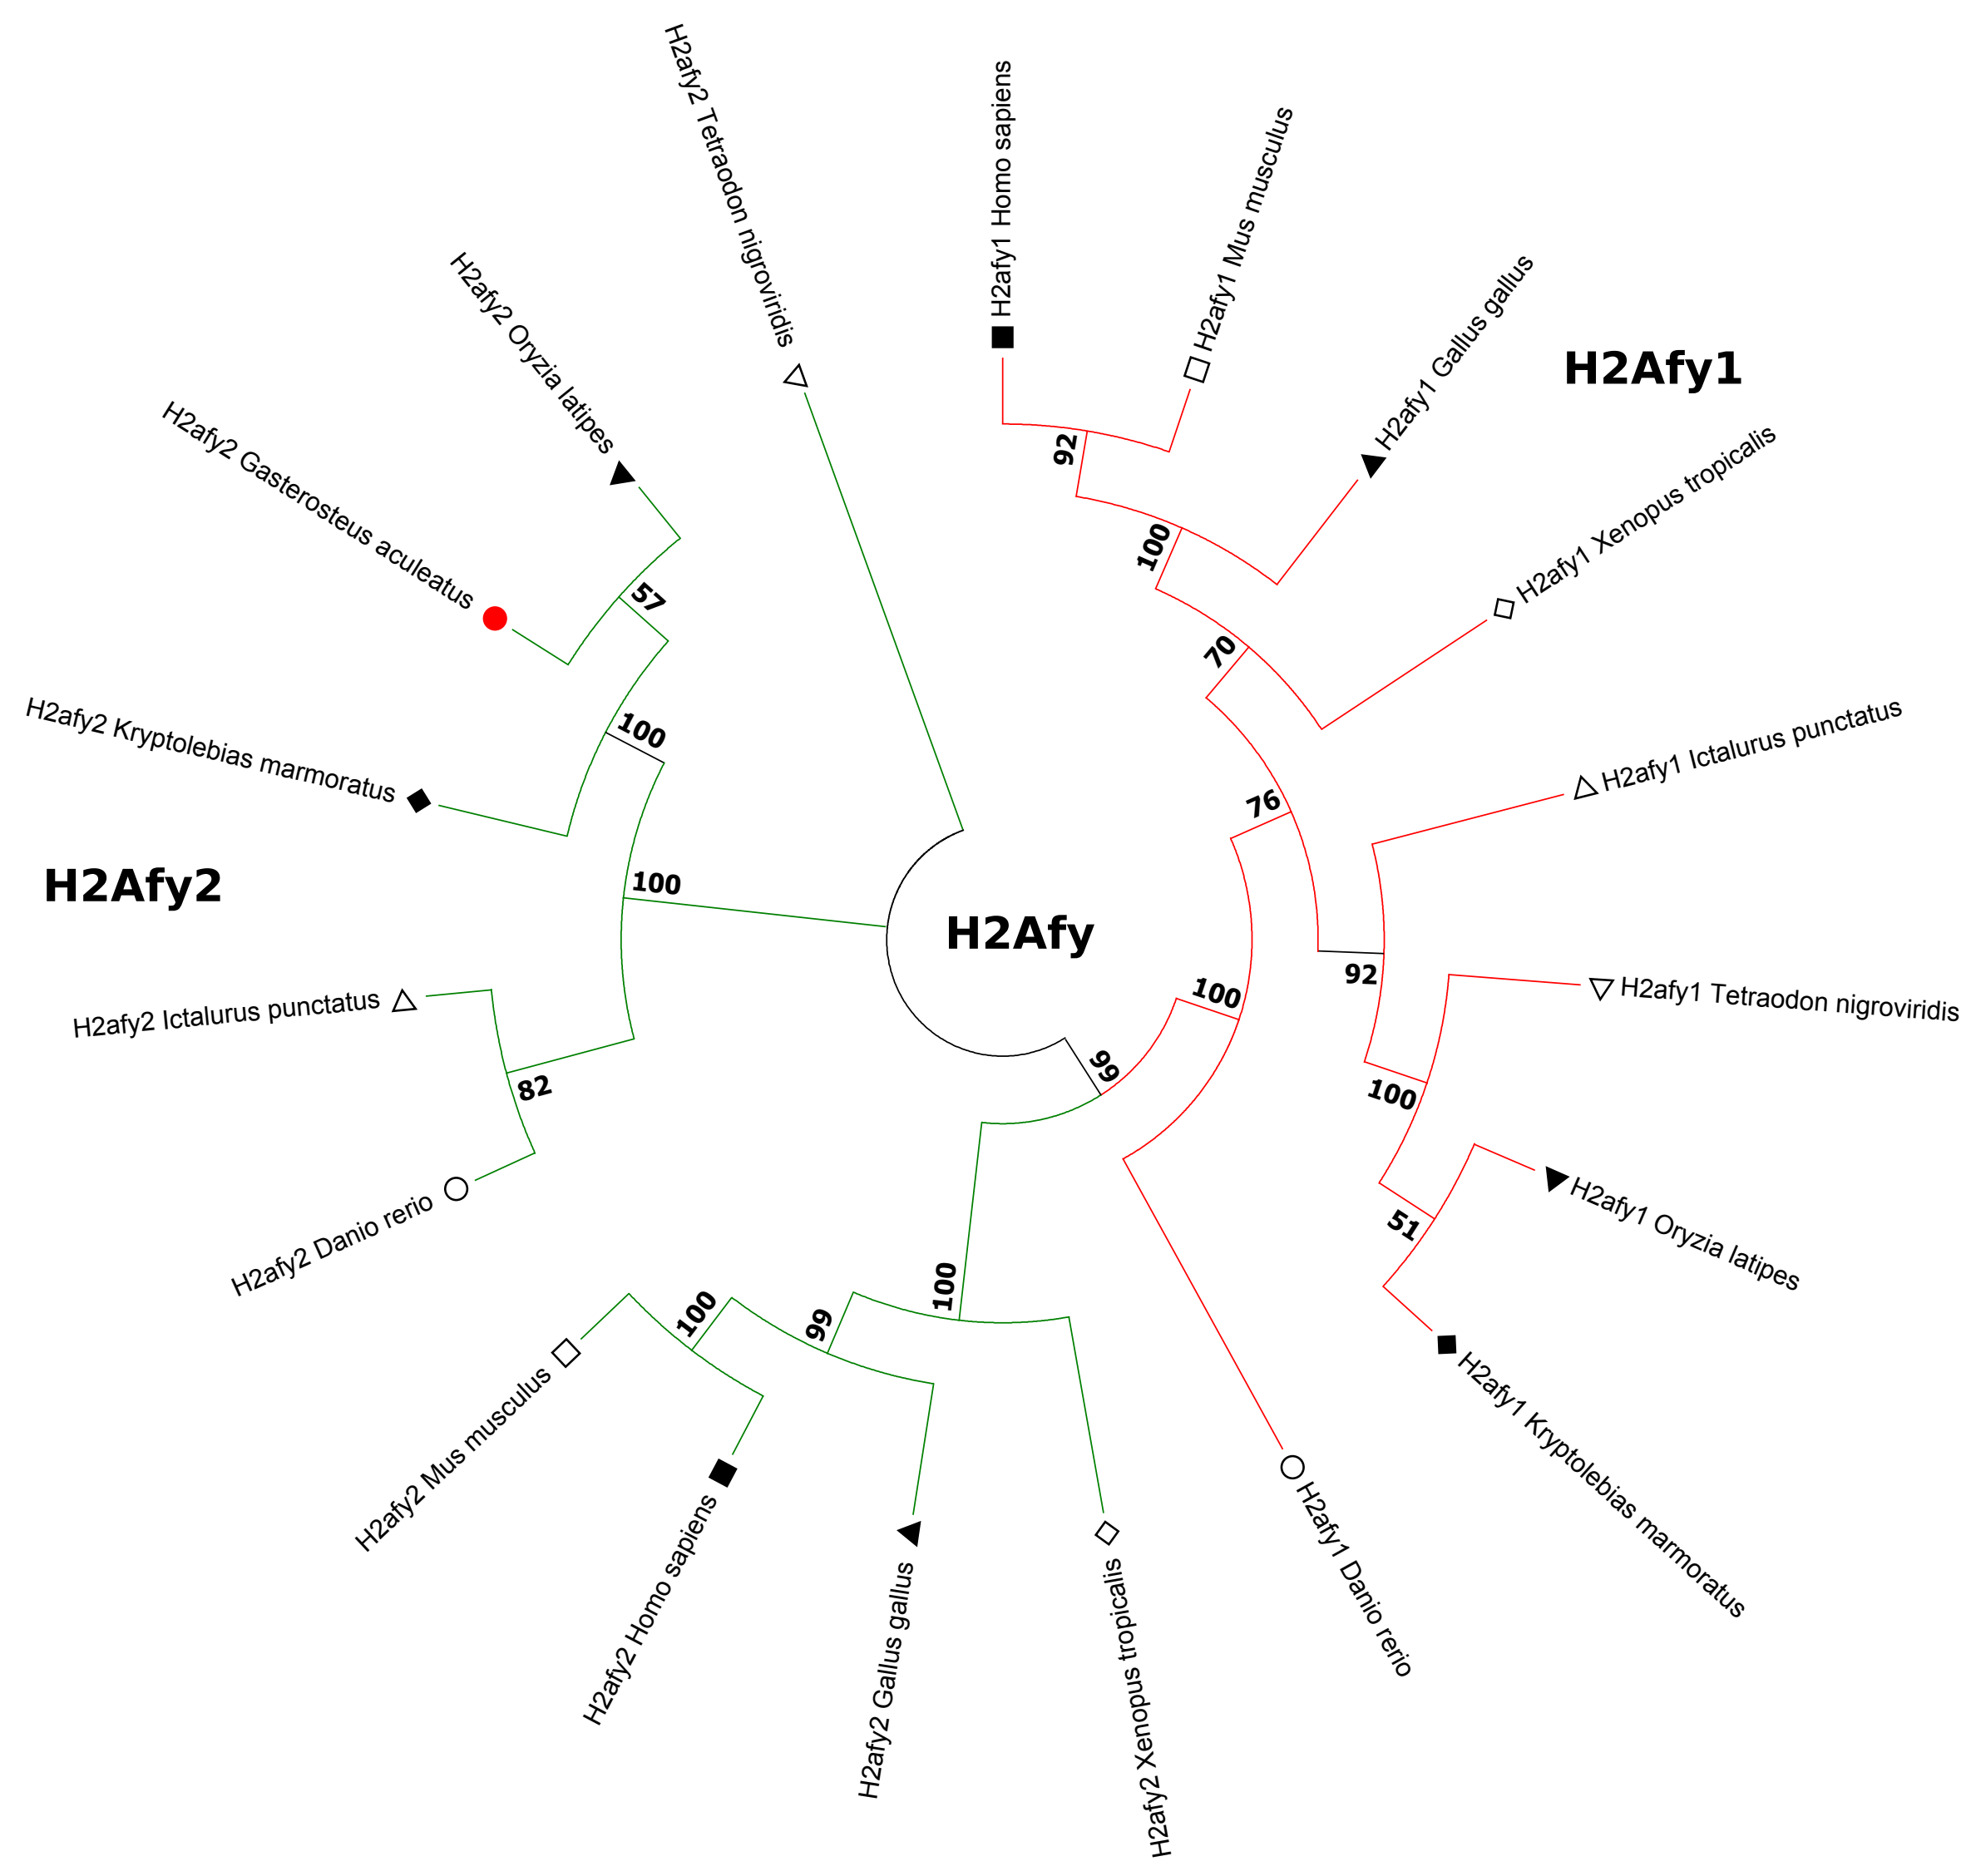

Supplement: Supplementary file 2 [file 18946607]

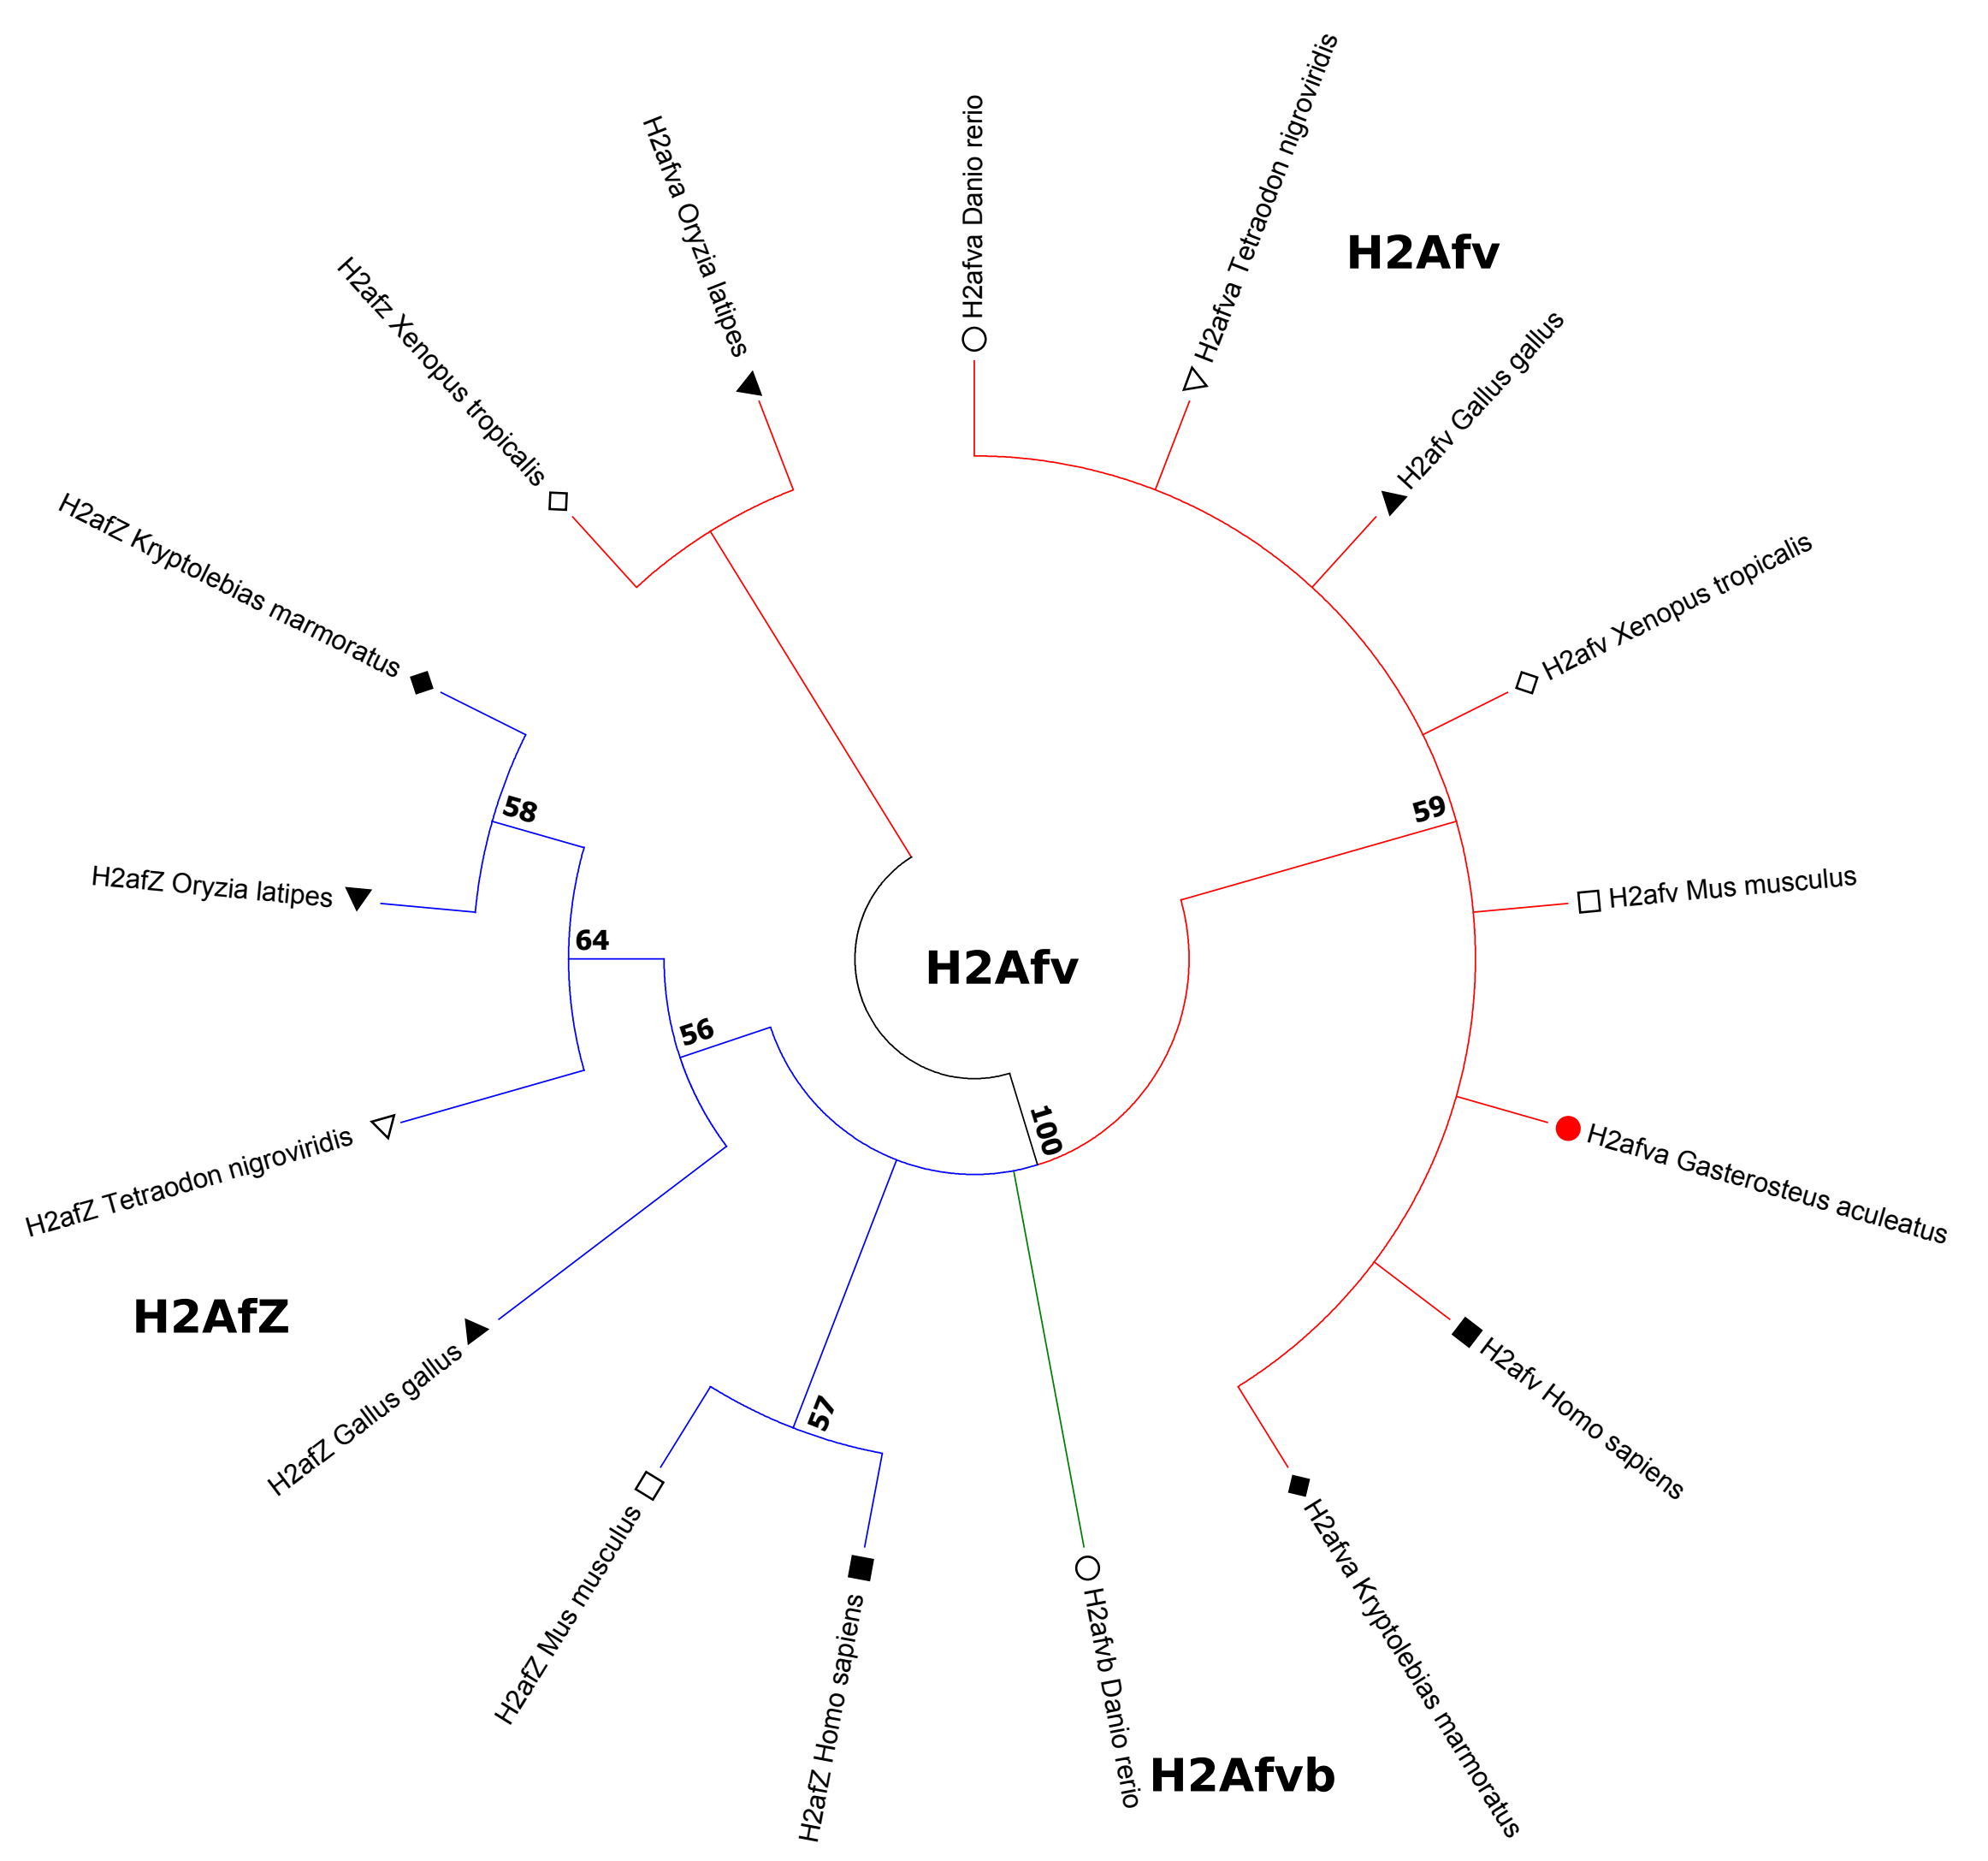

Supplement: Supplementary file 3 [file 18946607]

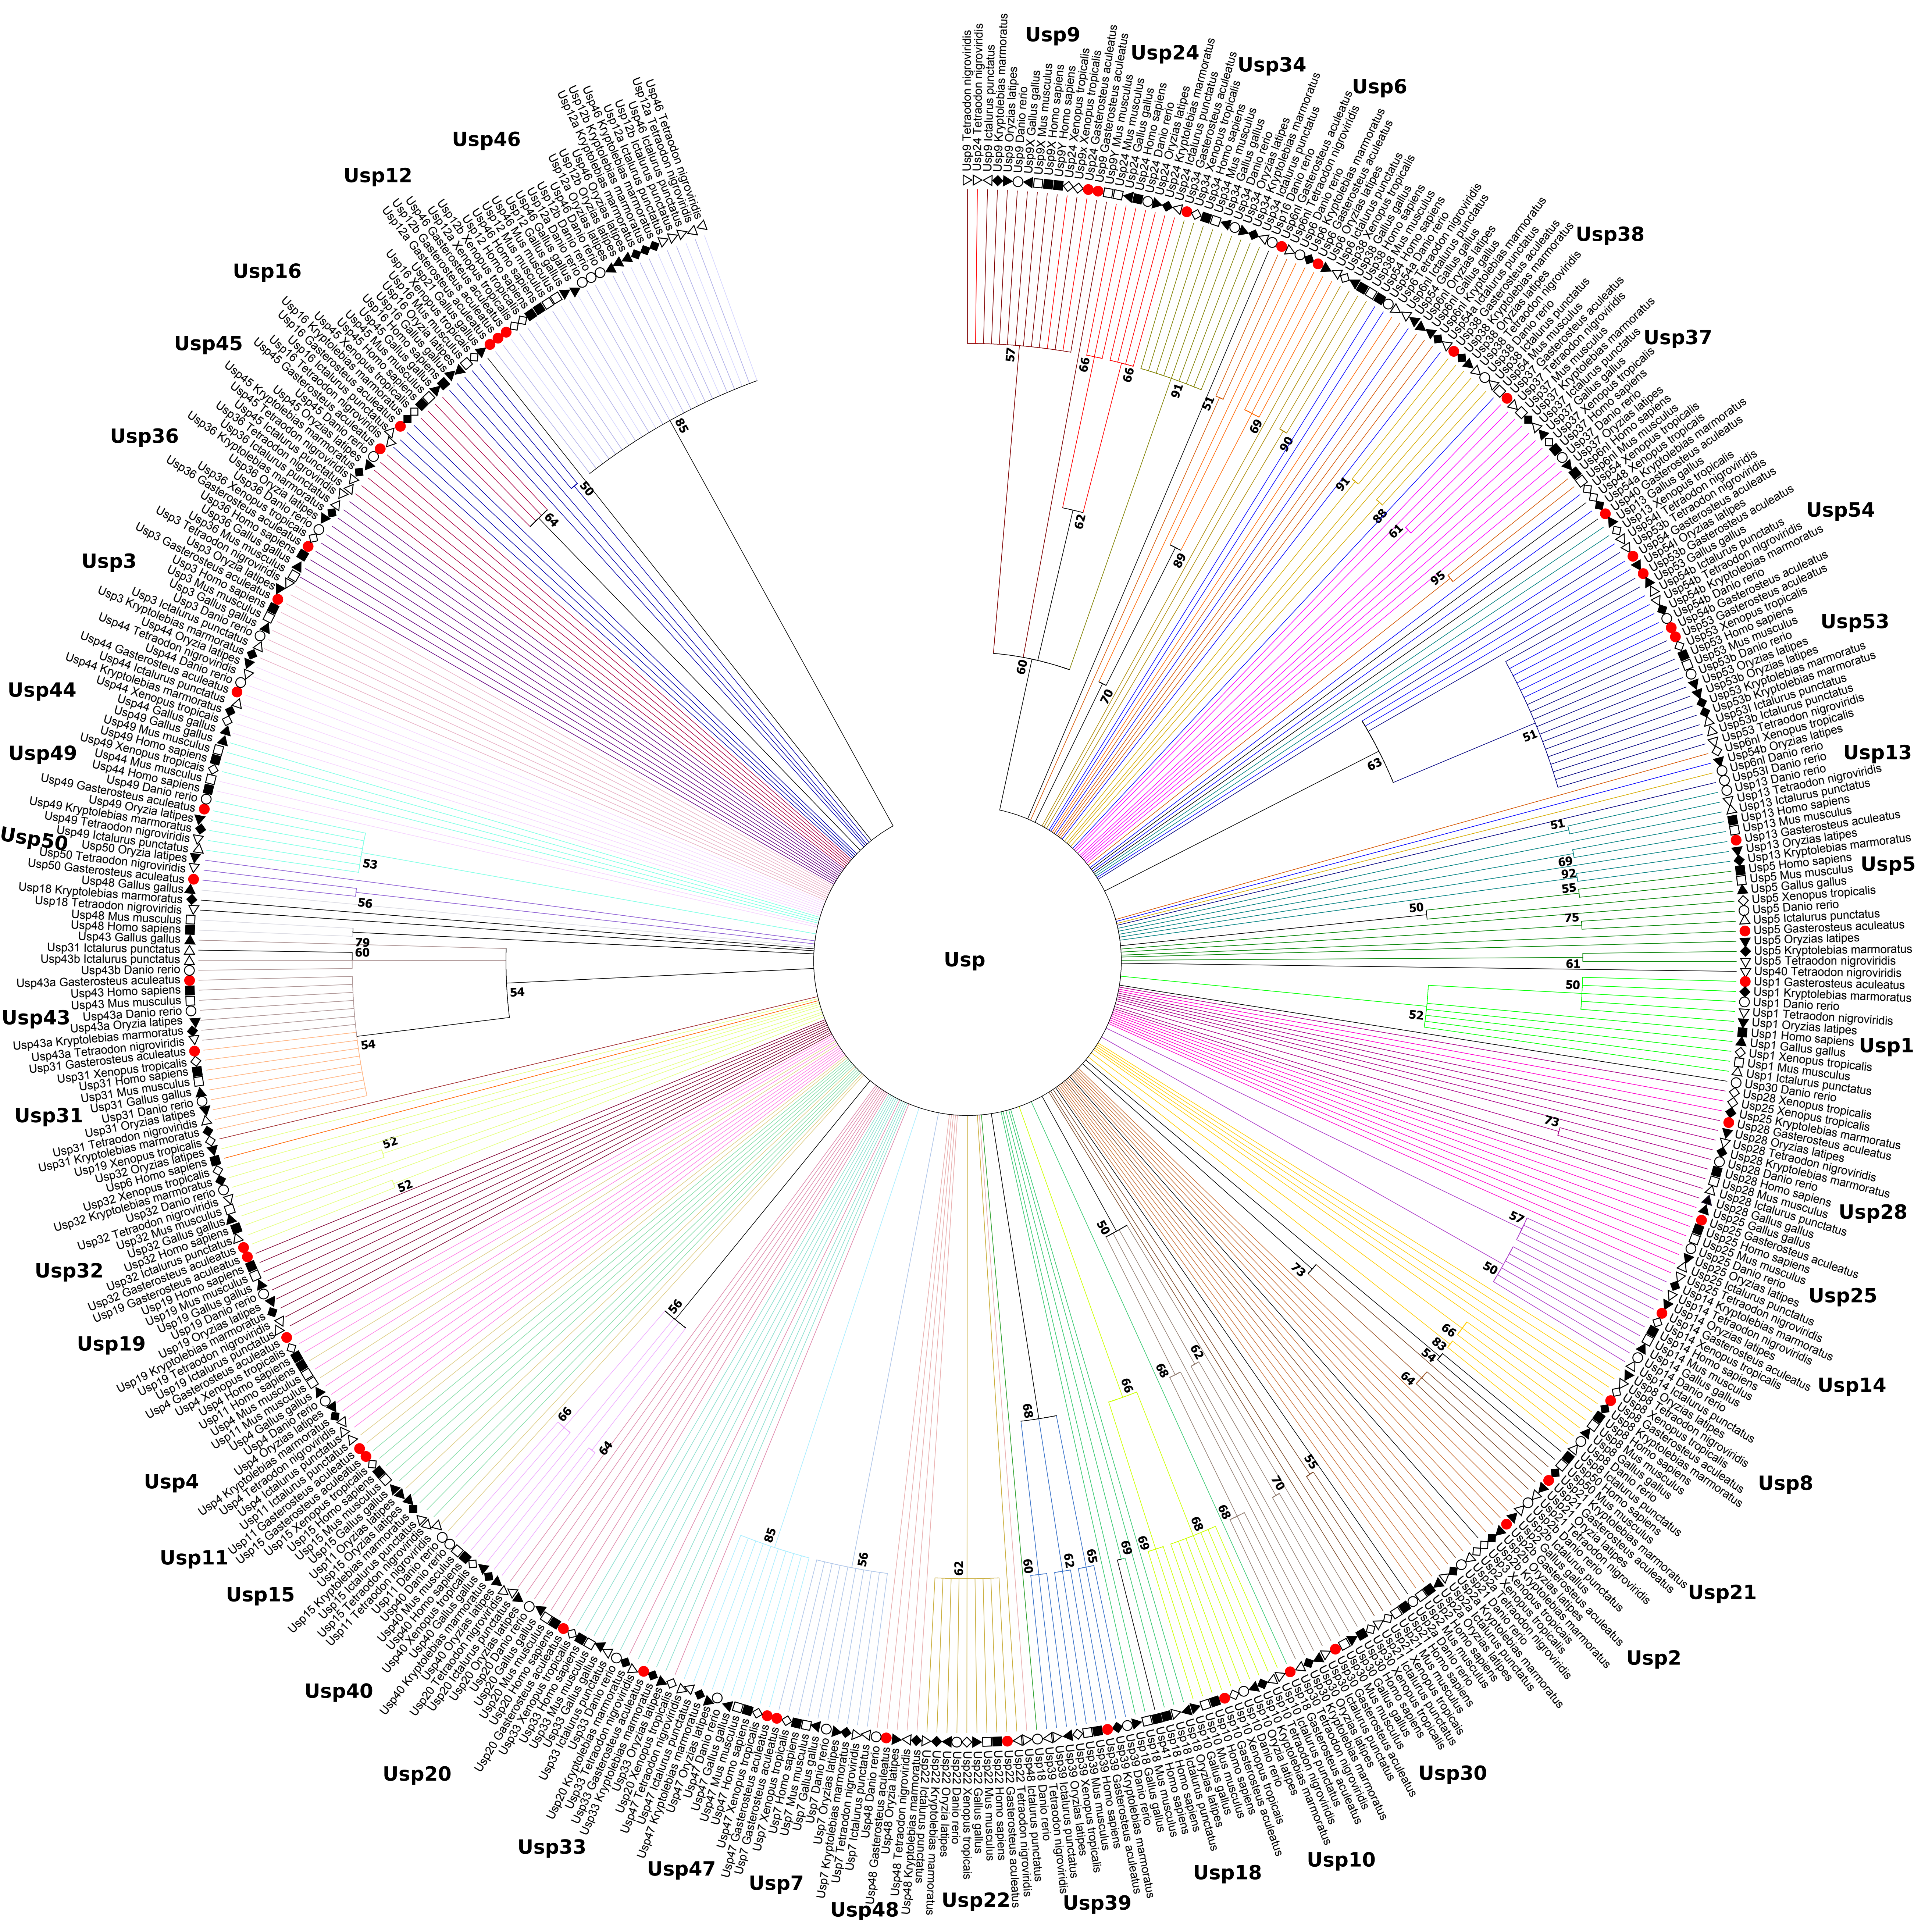

Supplement: Supplementary file 4 [file 18946607]

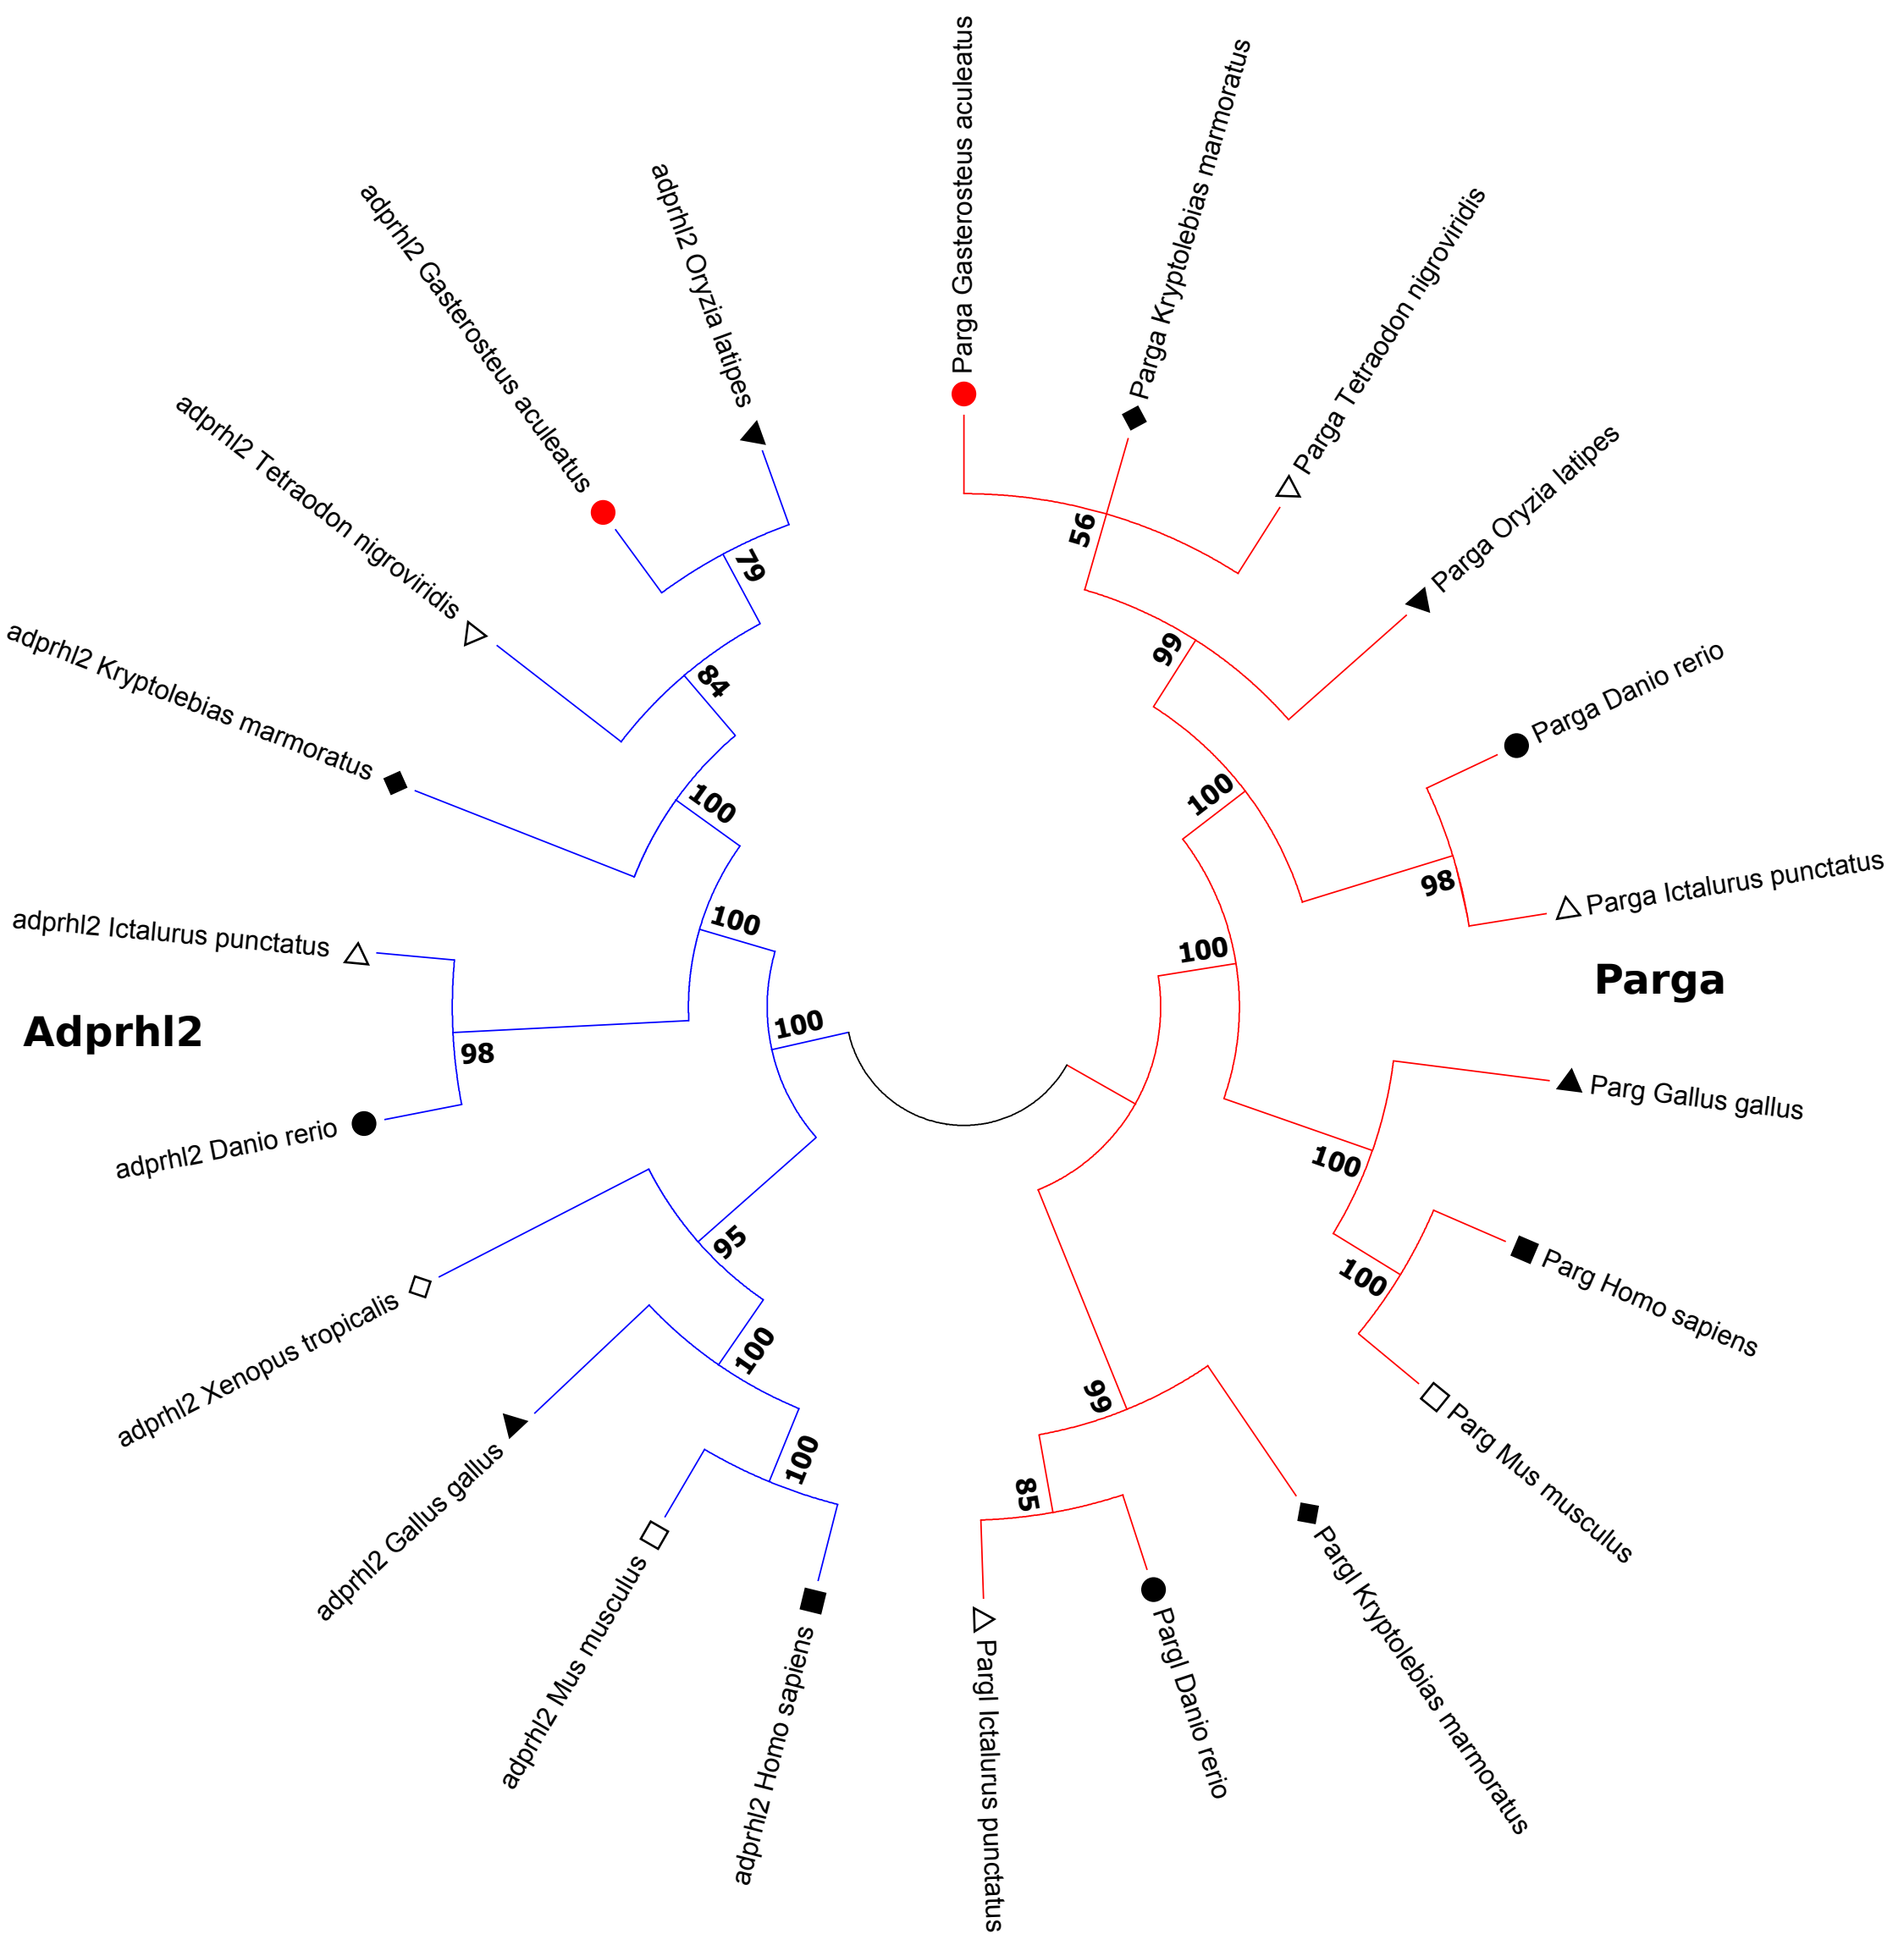

Supplement: Supplementary file 5 [file 18946607]

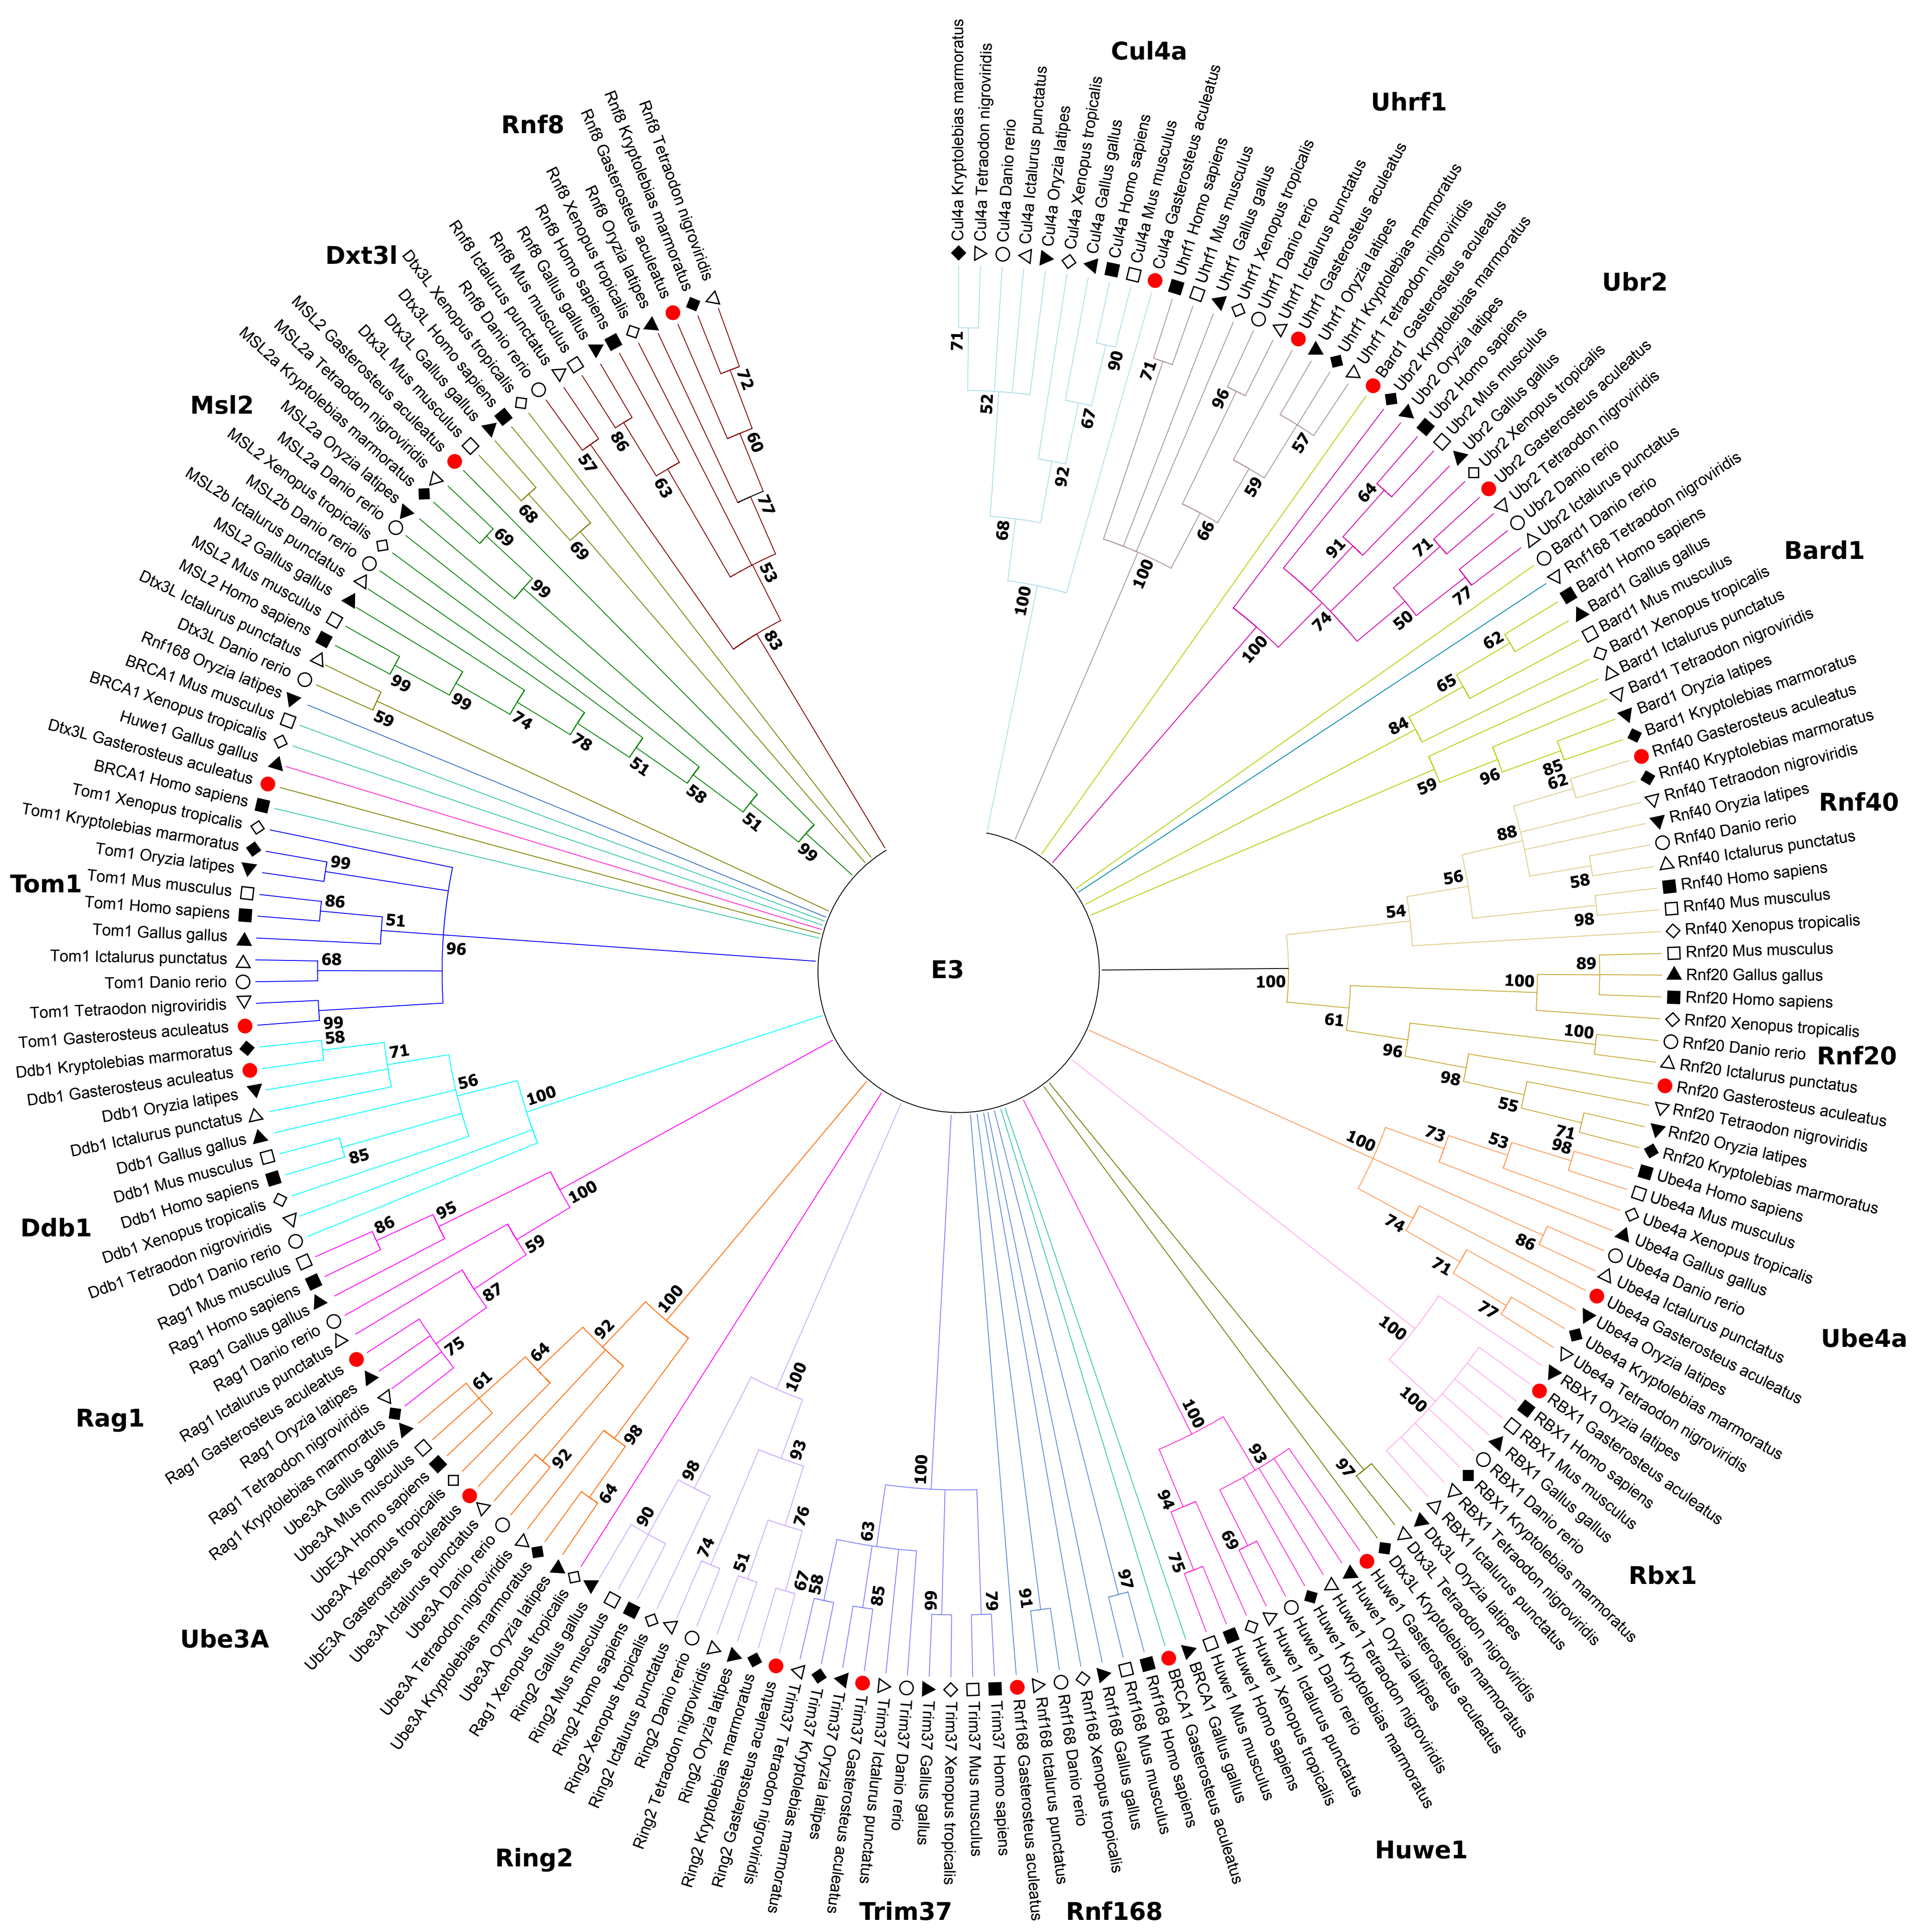

Supplement: Supplementary file 6 [file 18946607]

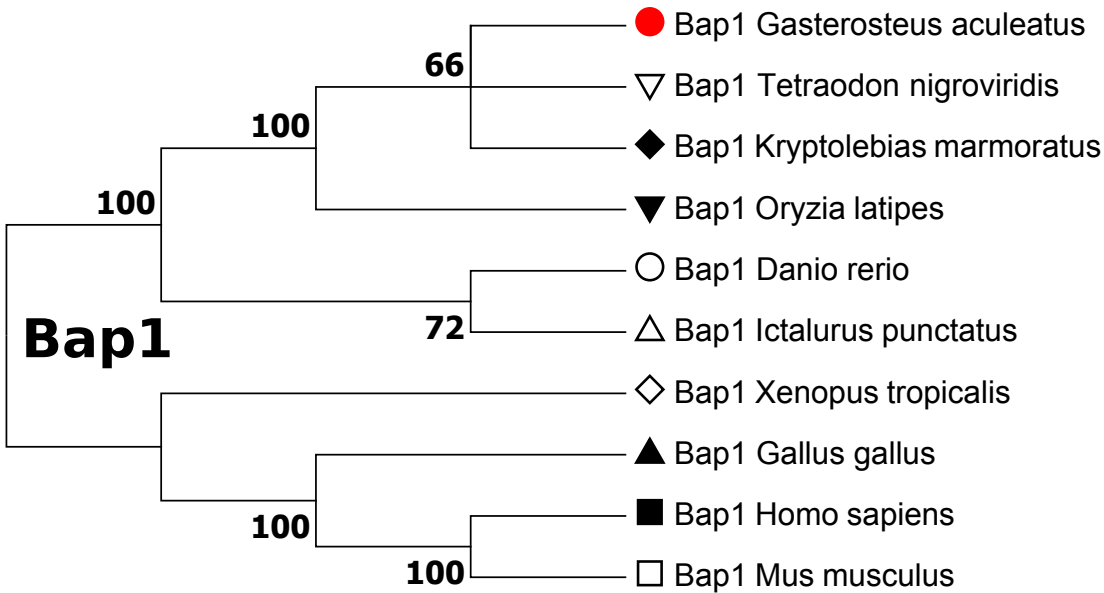

Supplement: Supplementary file 8 [file 18946607]

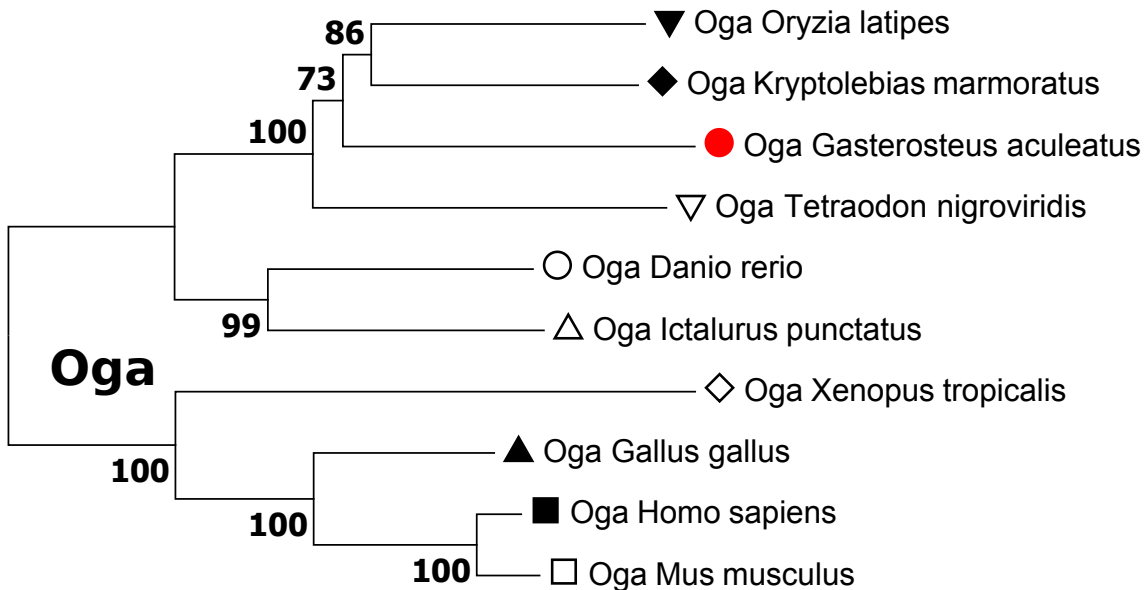

20

Supplement: Supplementary file 9 [file 18946607]

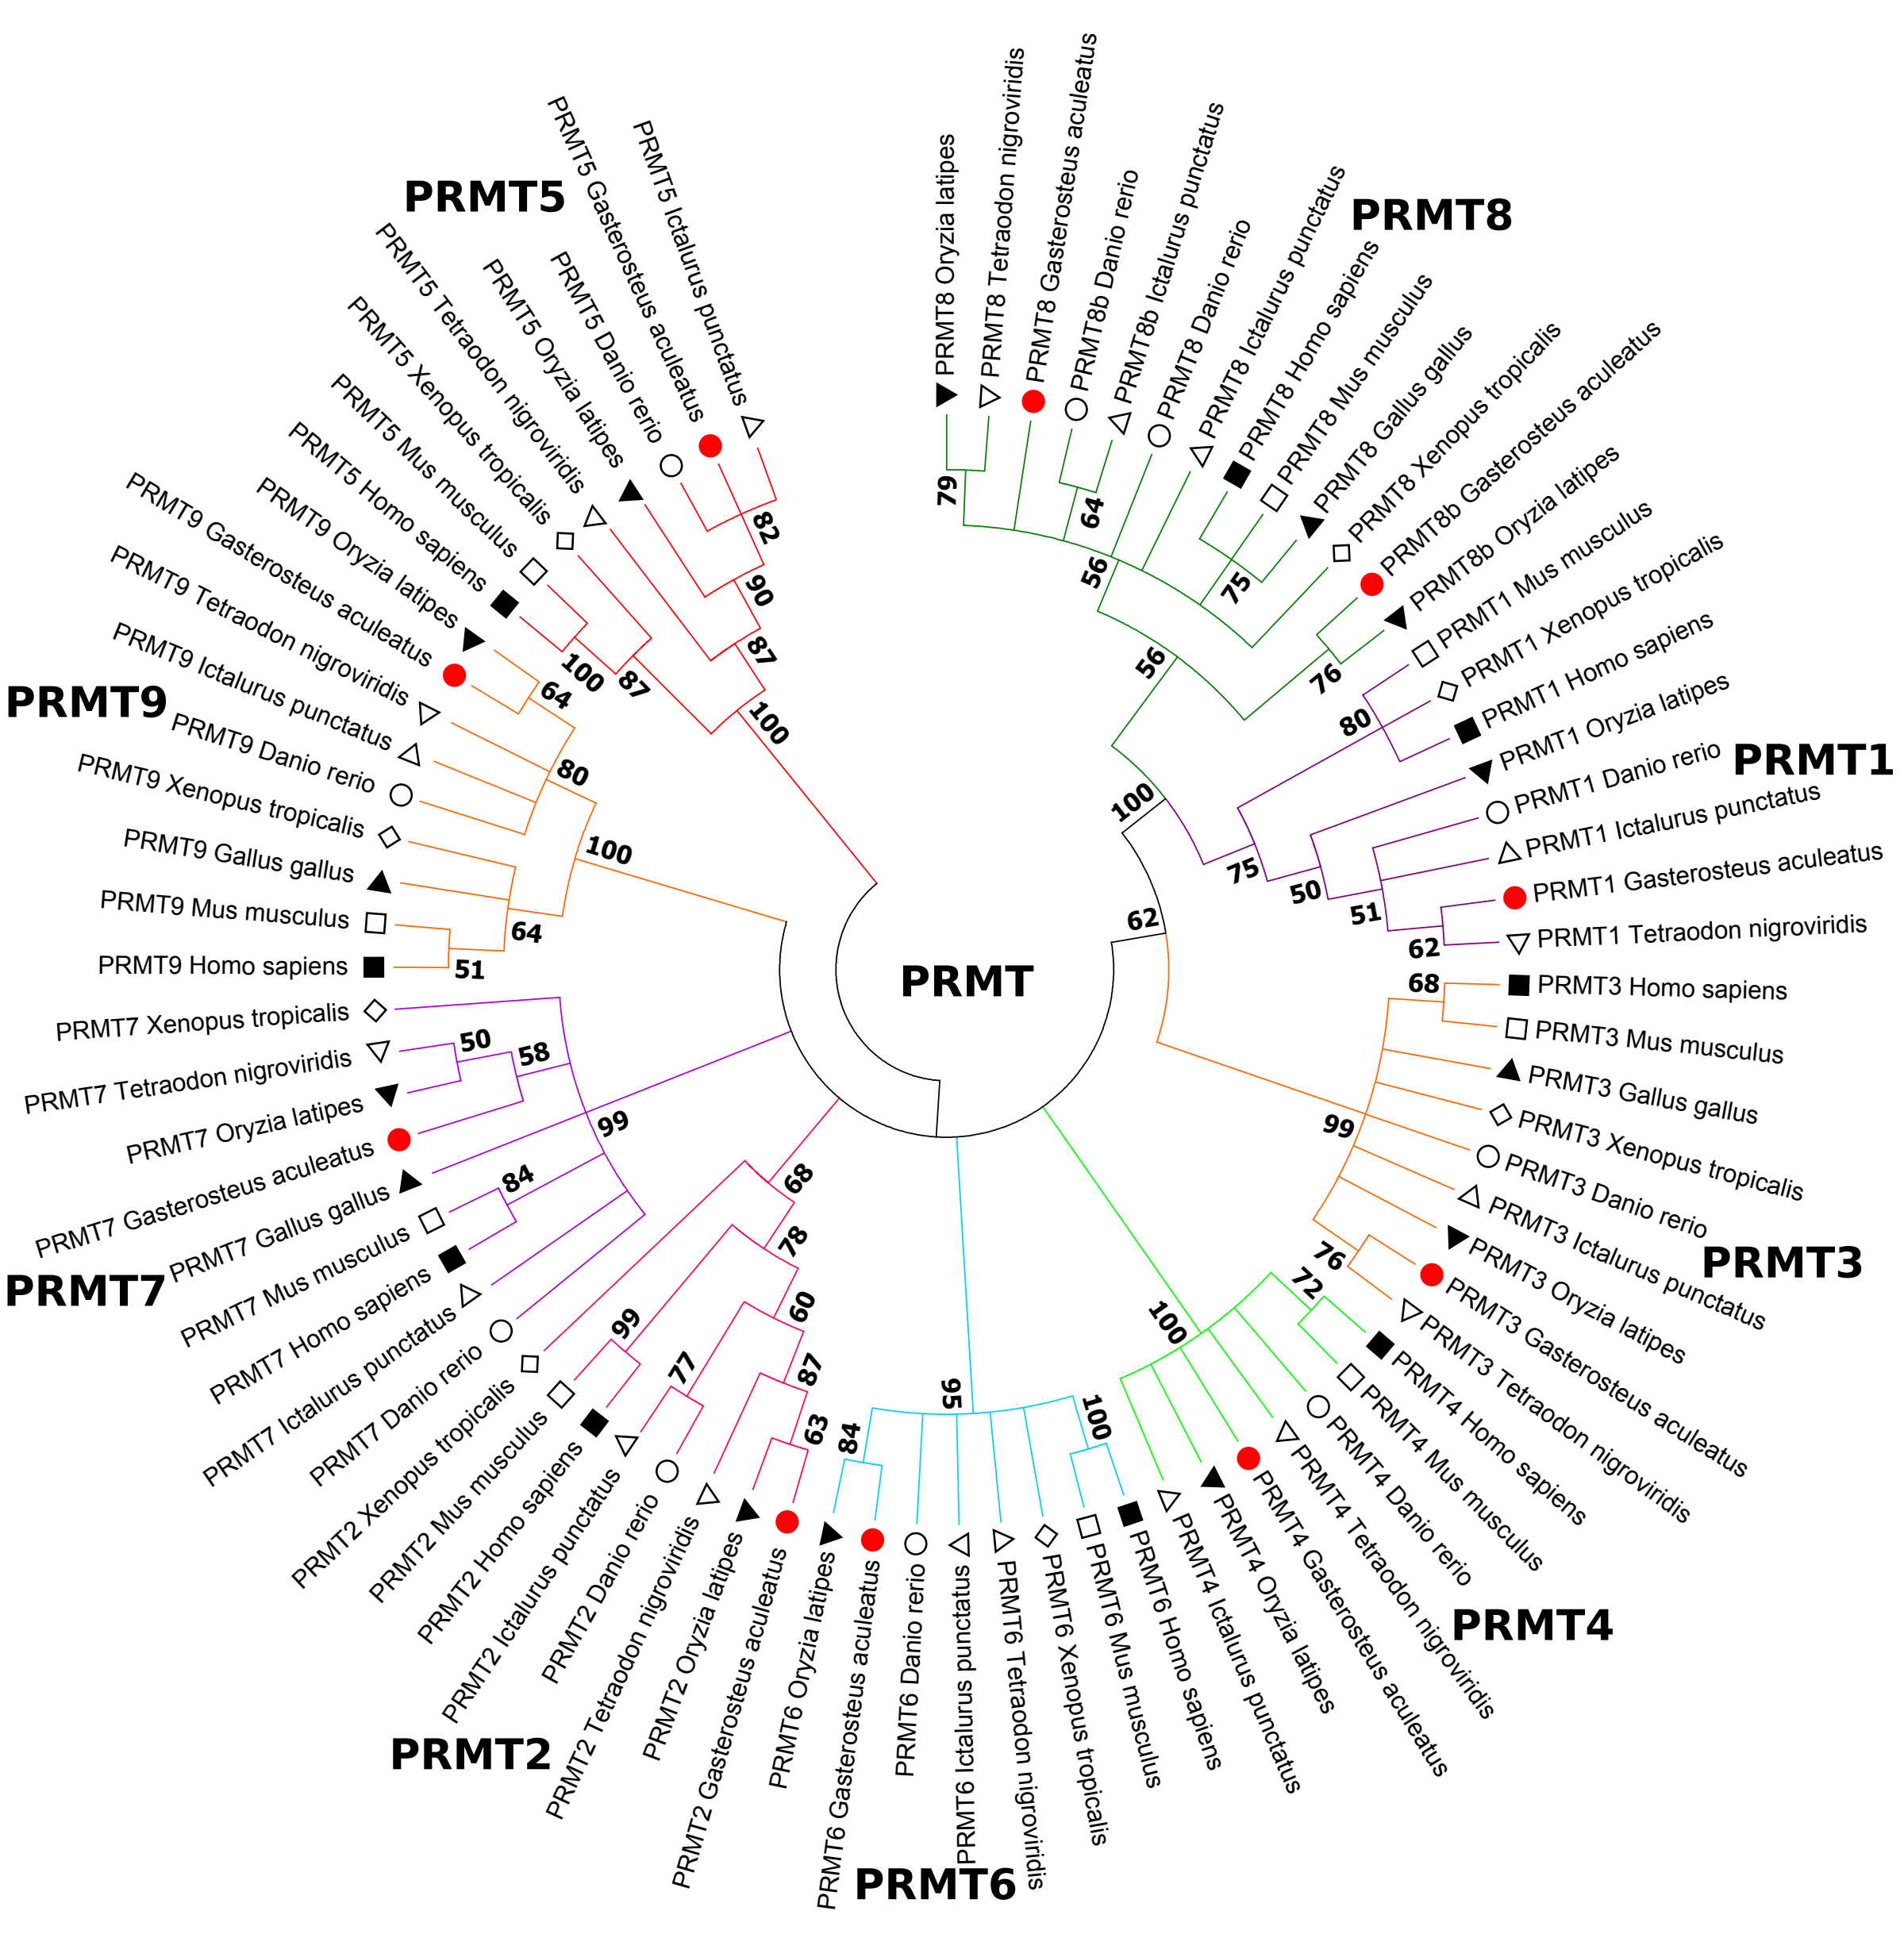

Supplement: Supplementary file 10 [file 18946607]

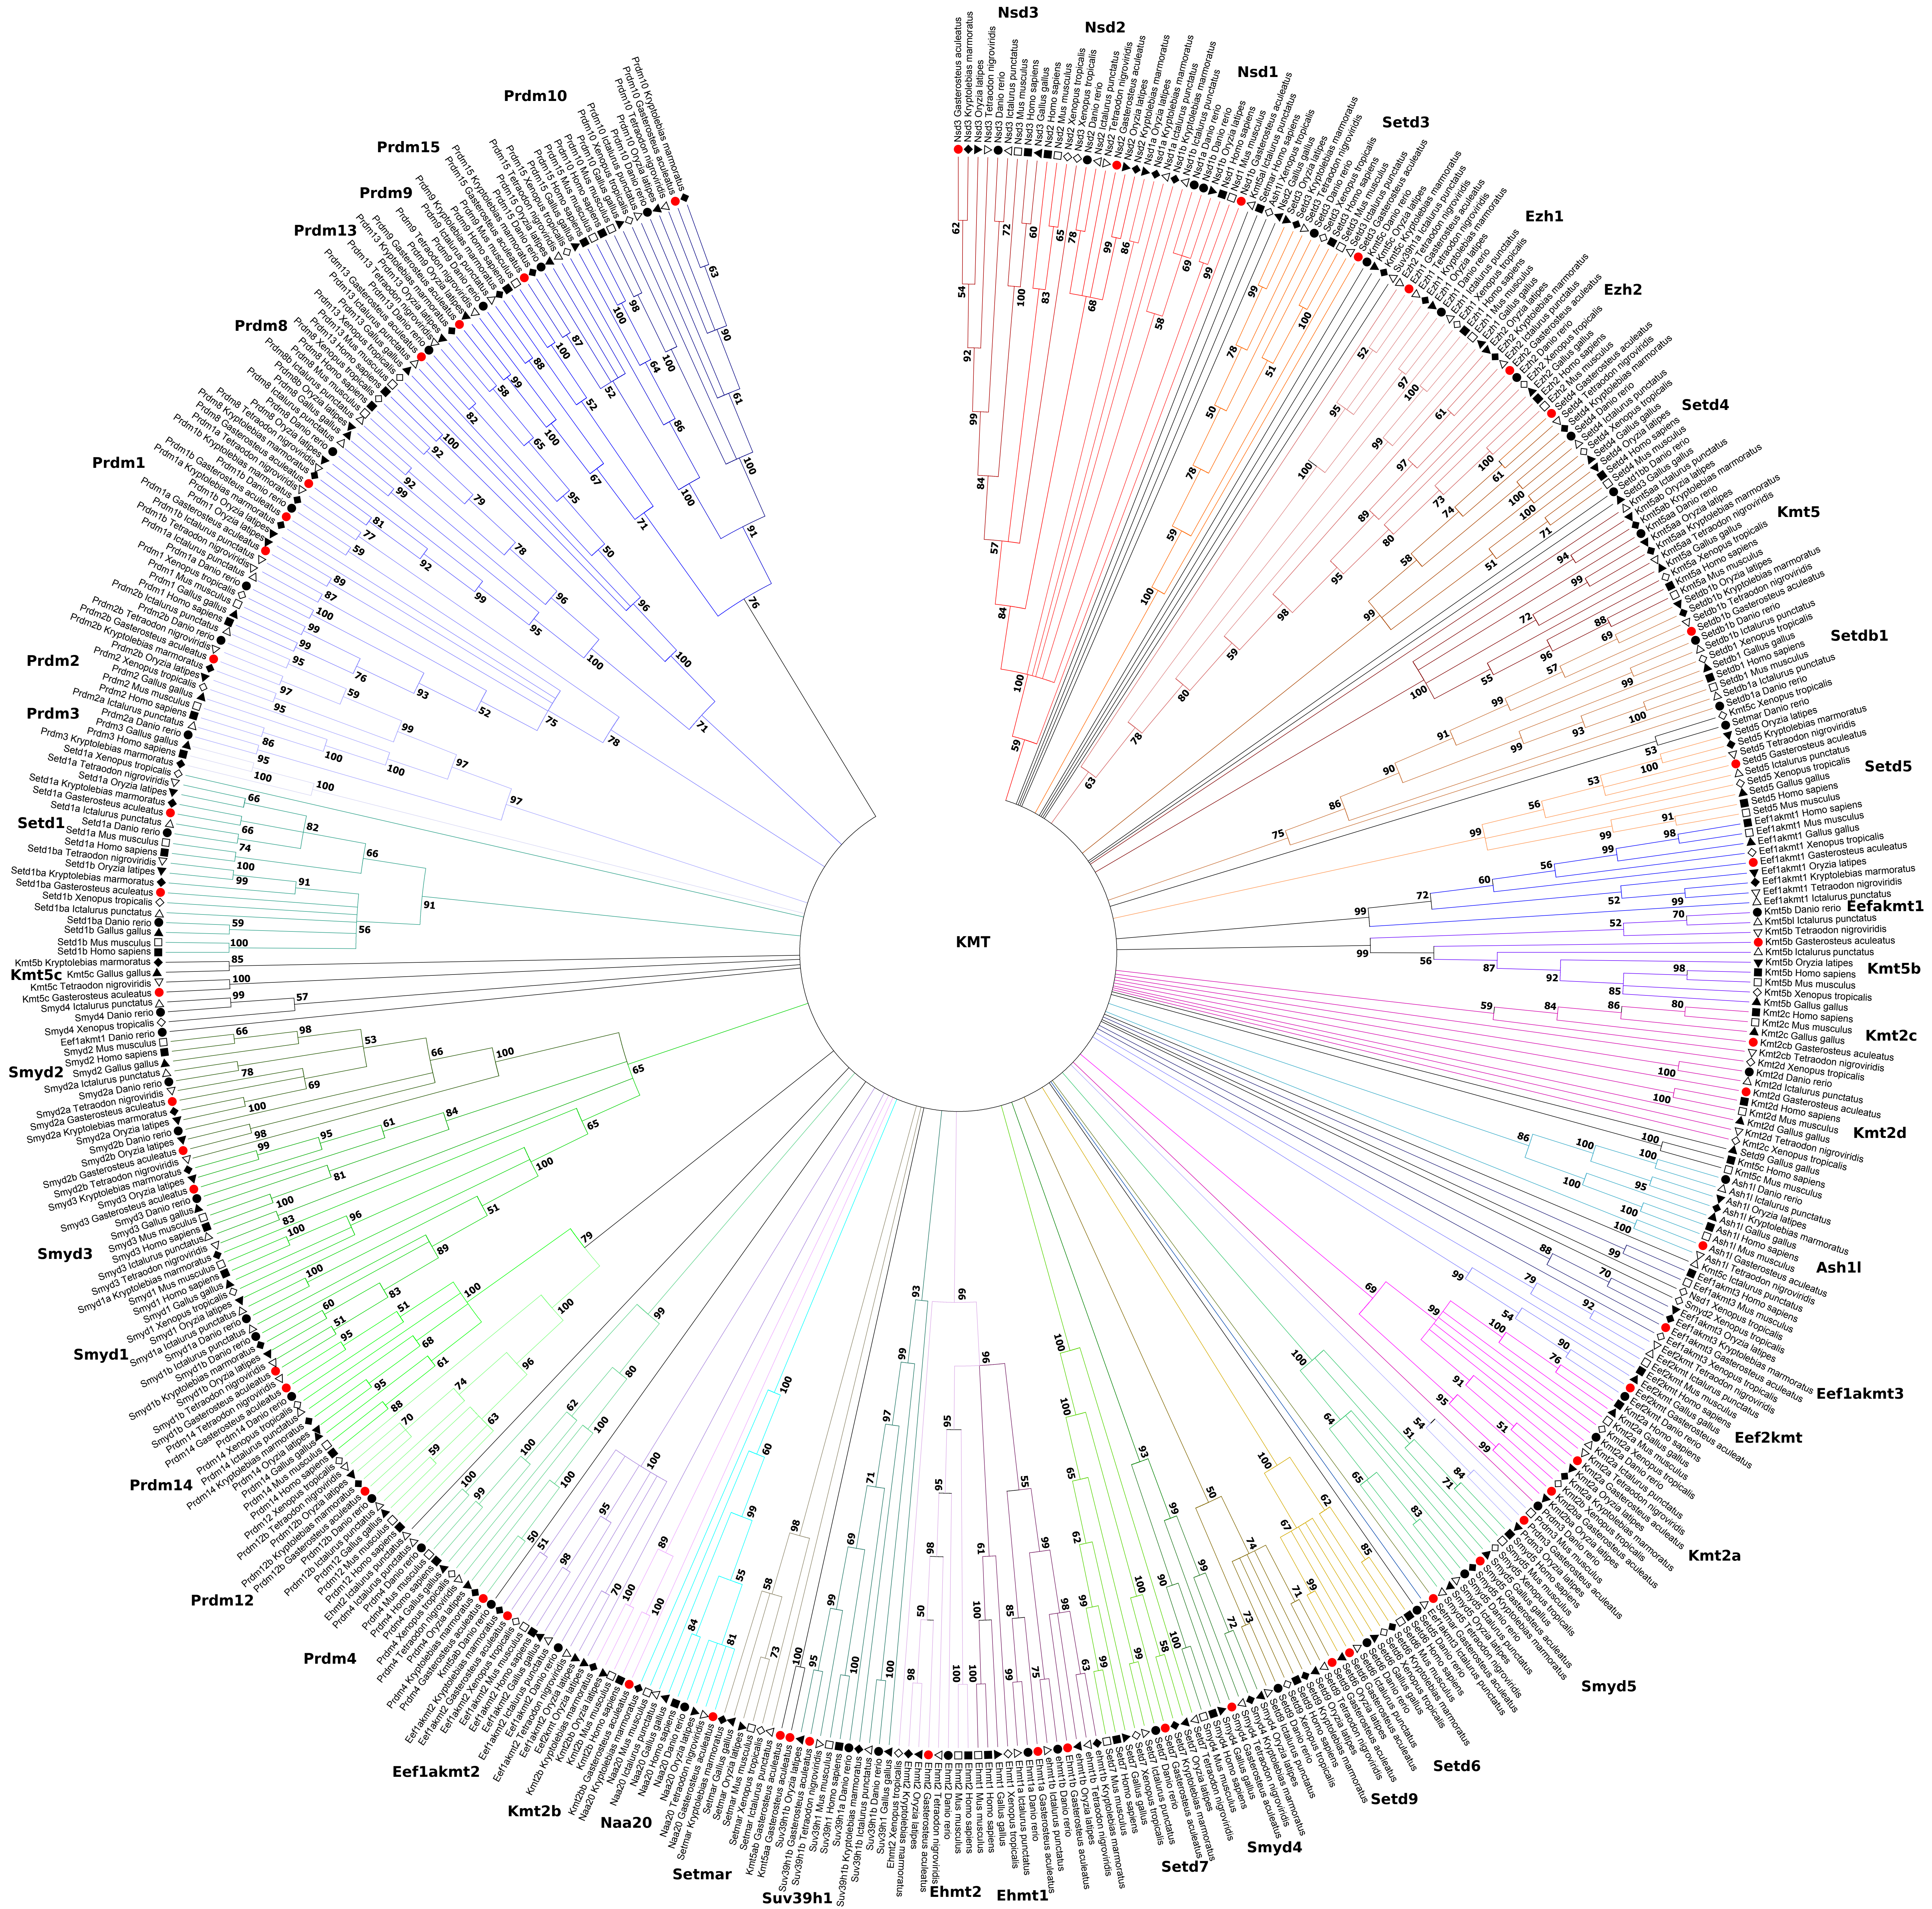

Supplement: Supplementary file 11 [file 18946607]

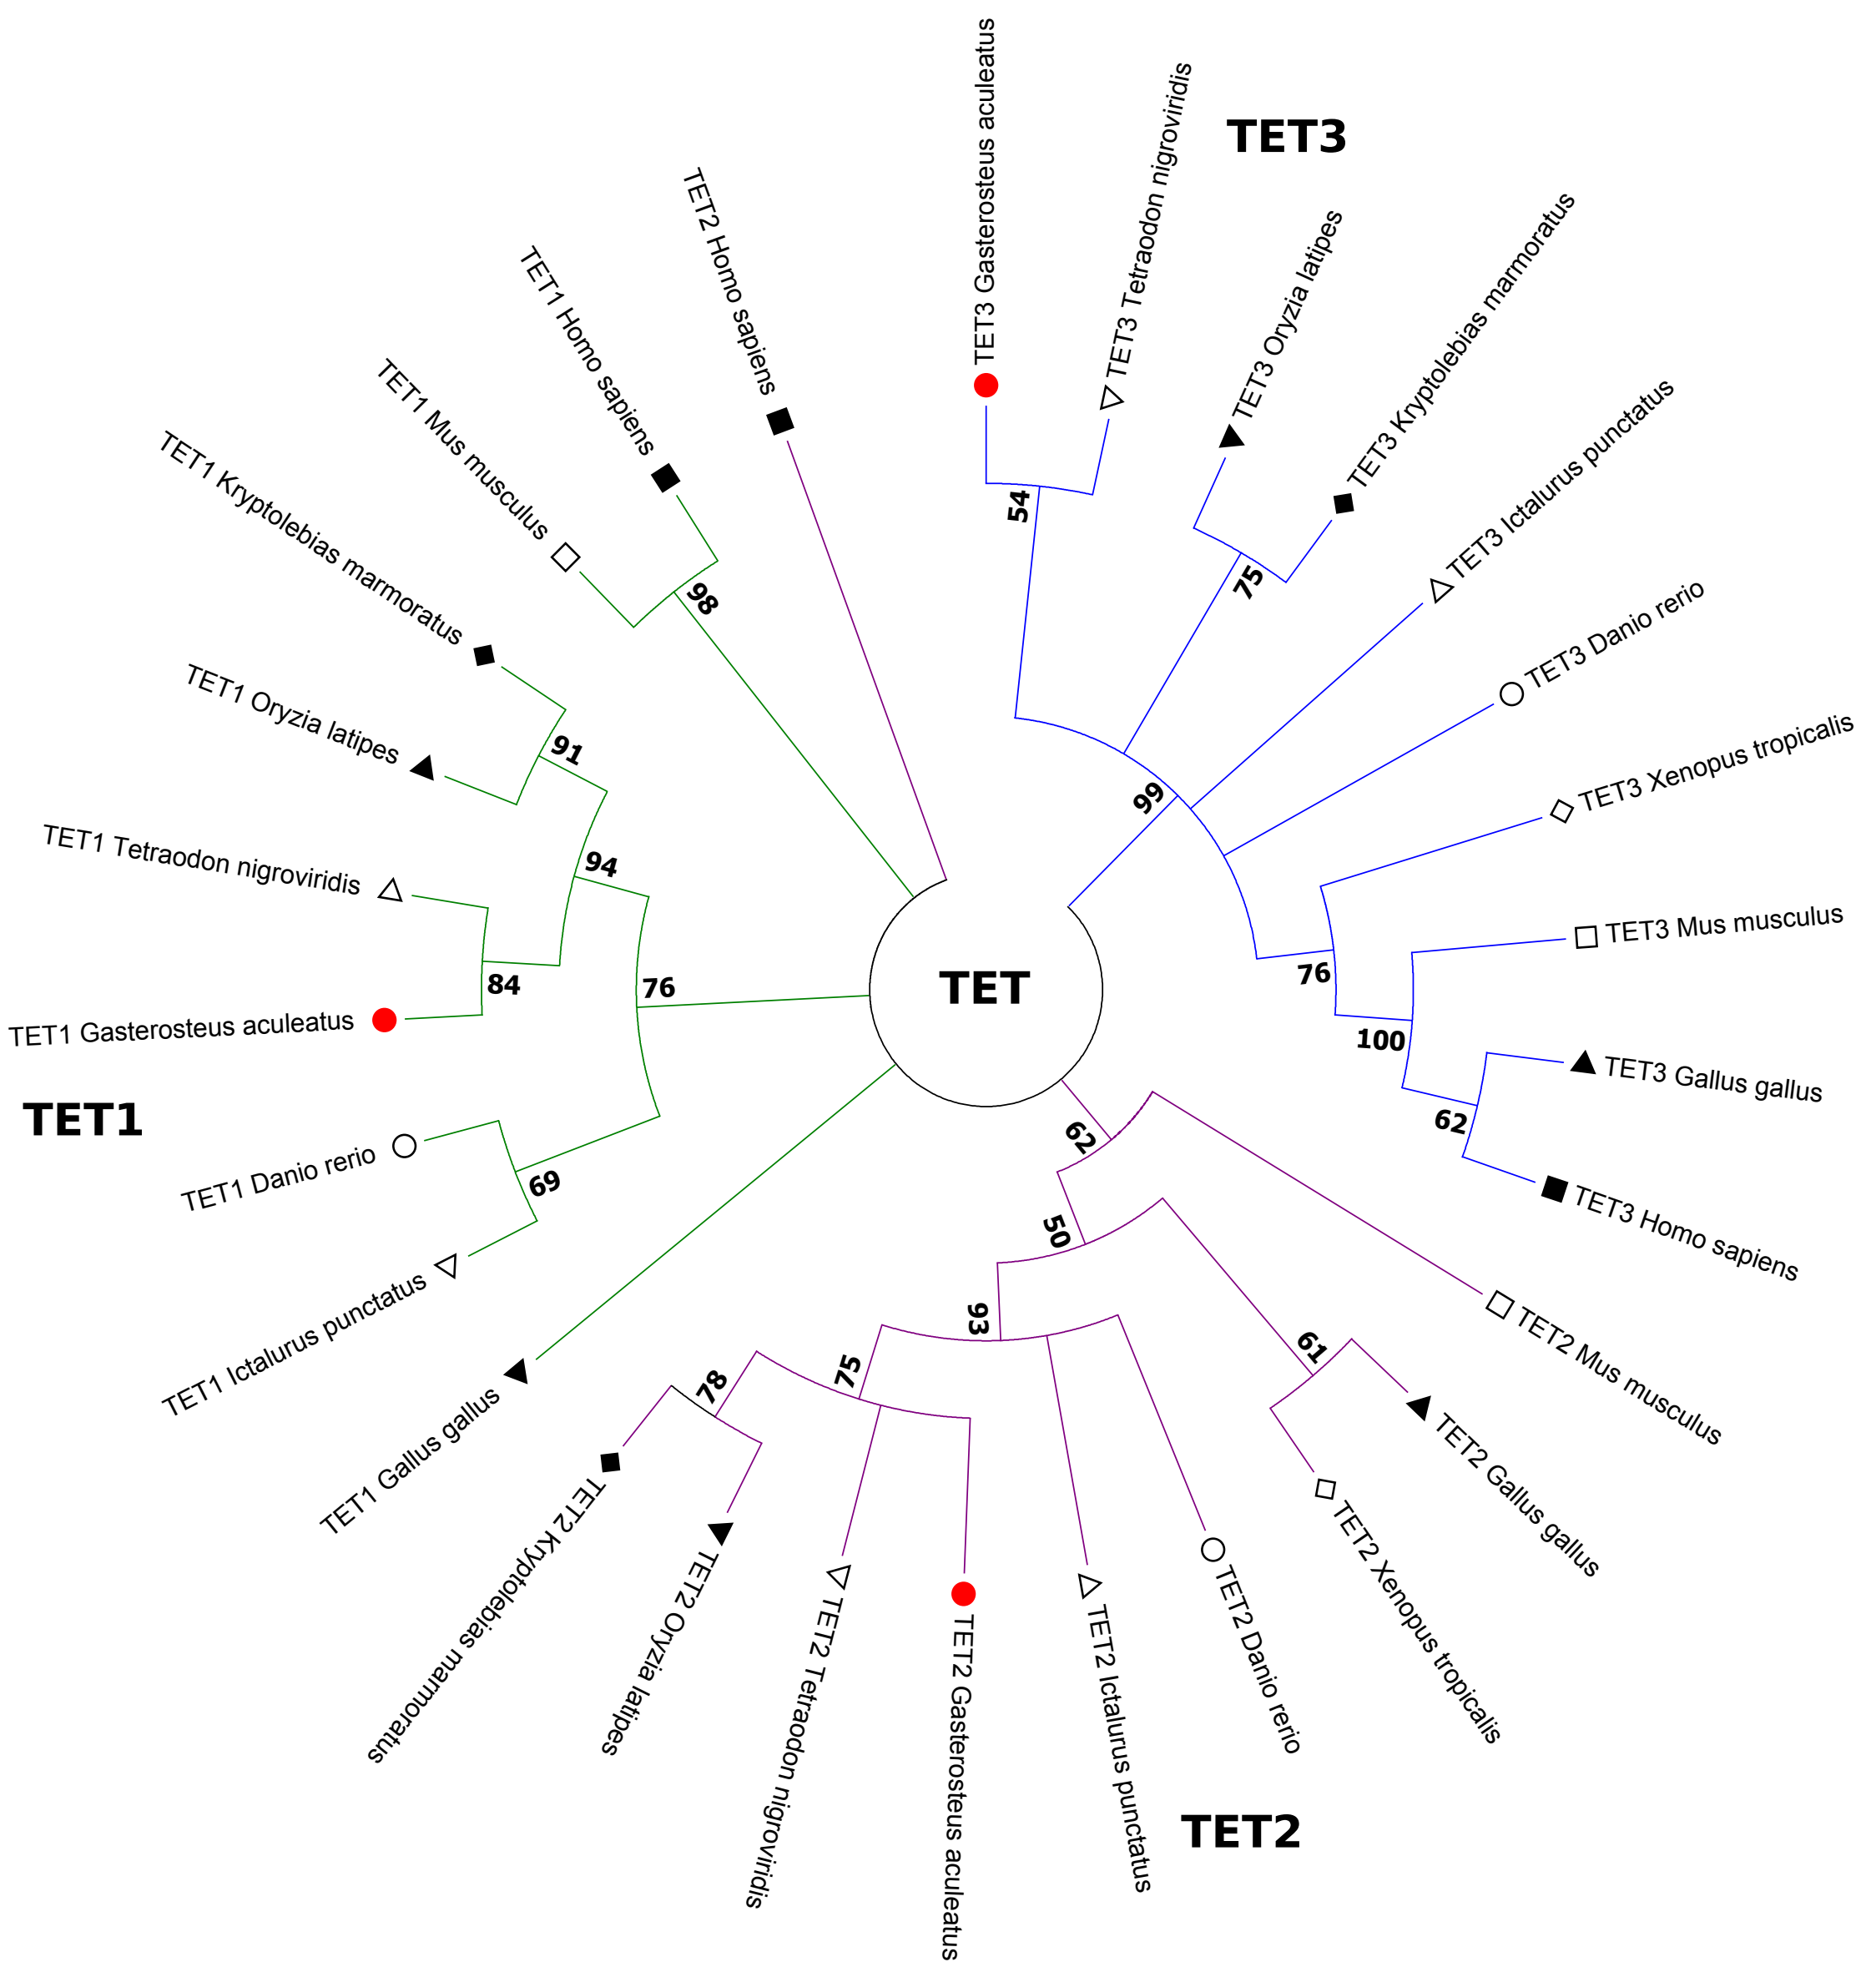

Supplement: Supplementary file 12 [file 18946607]

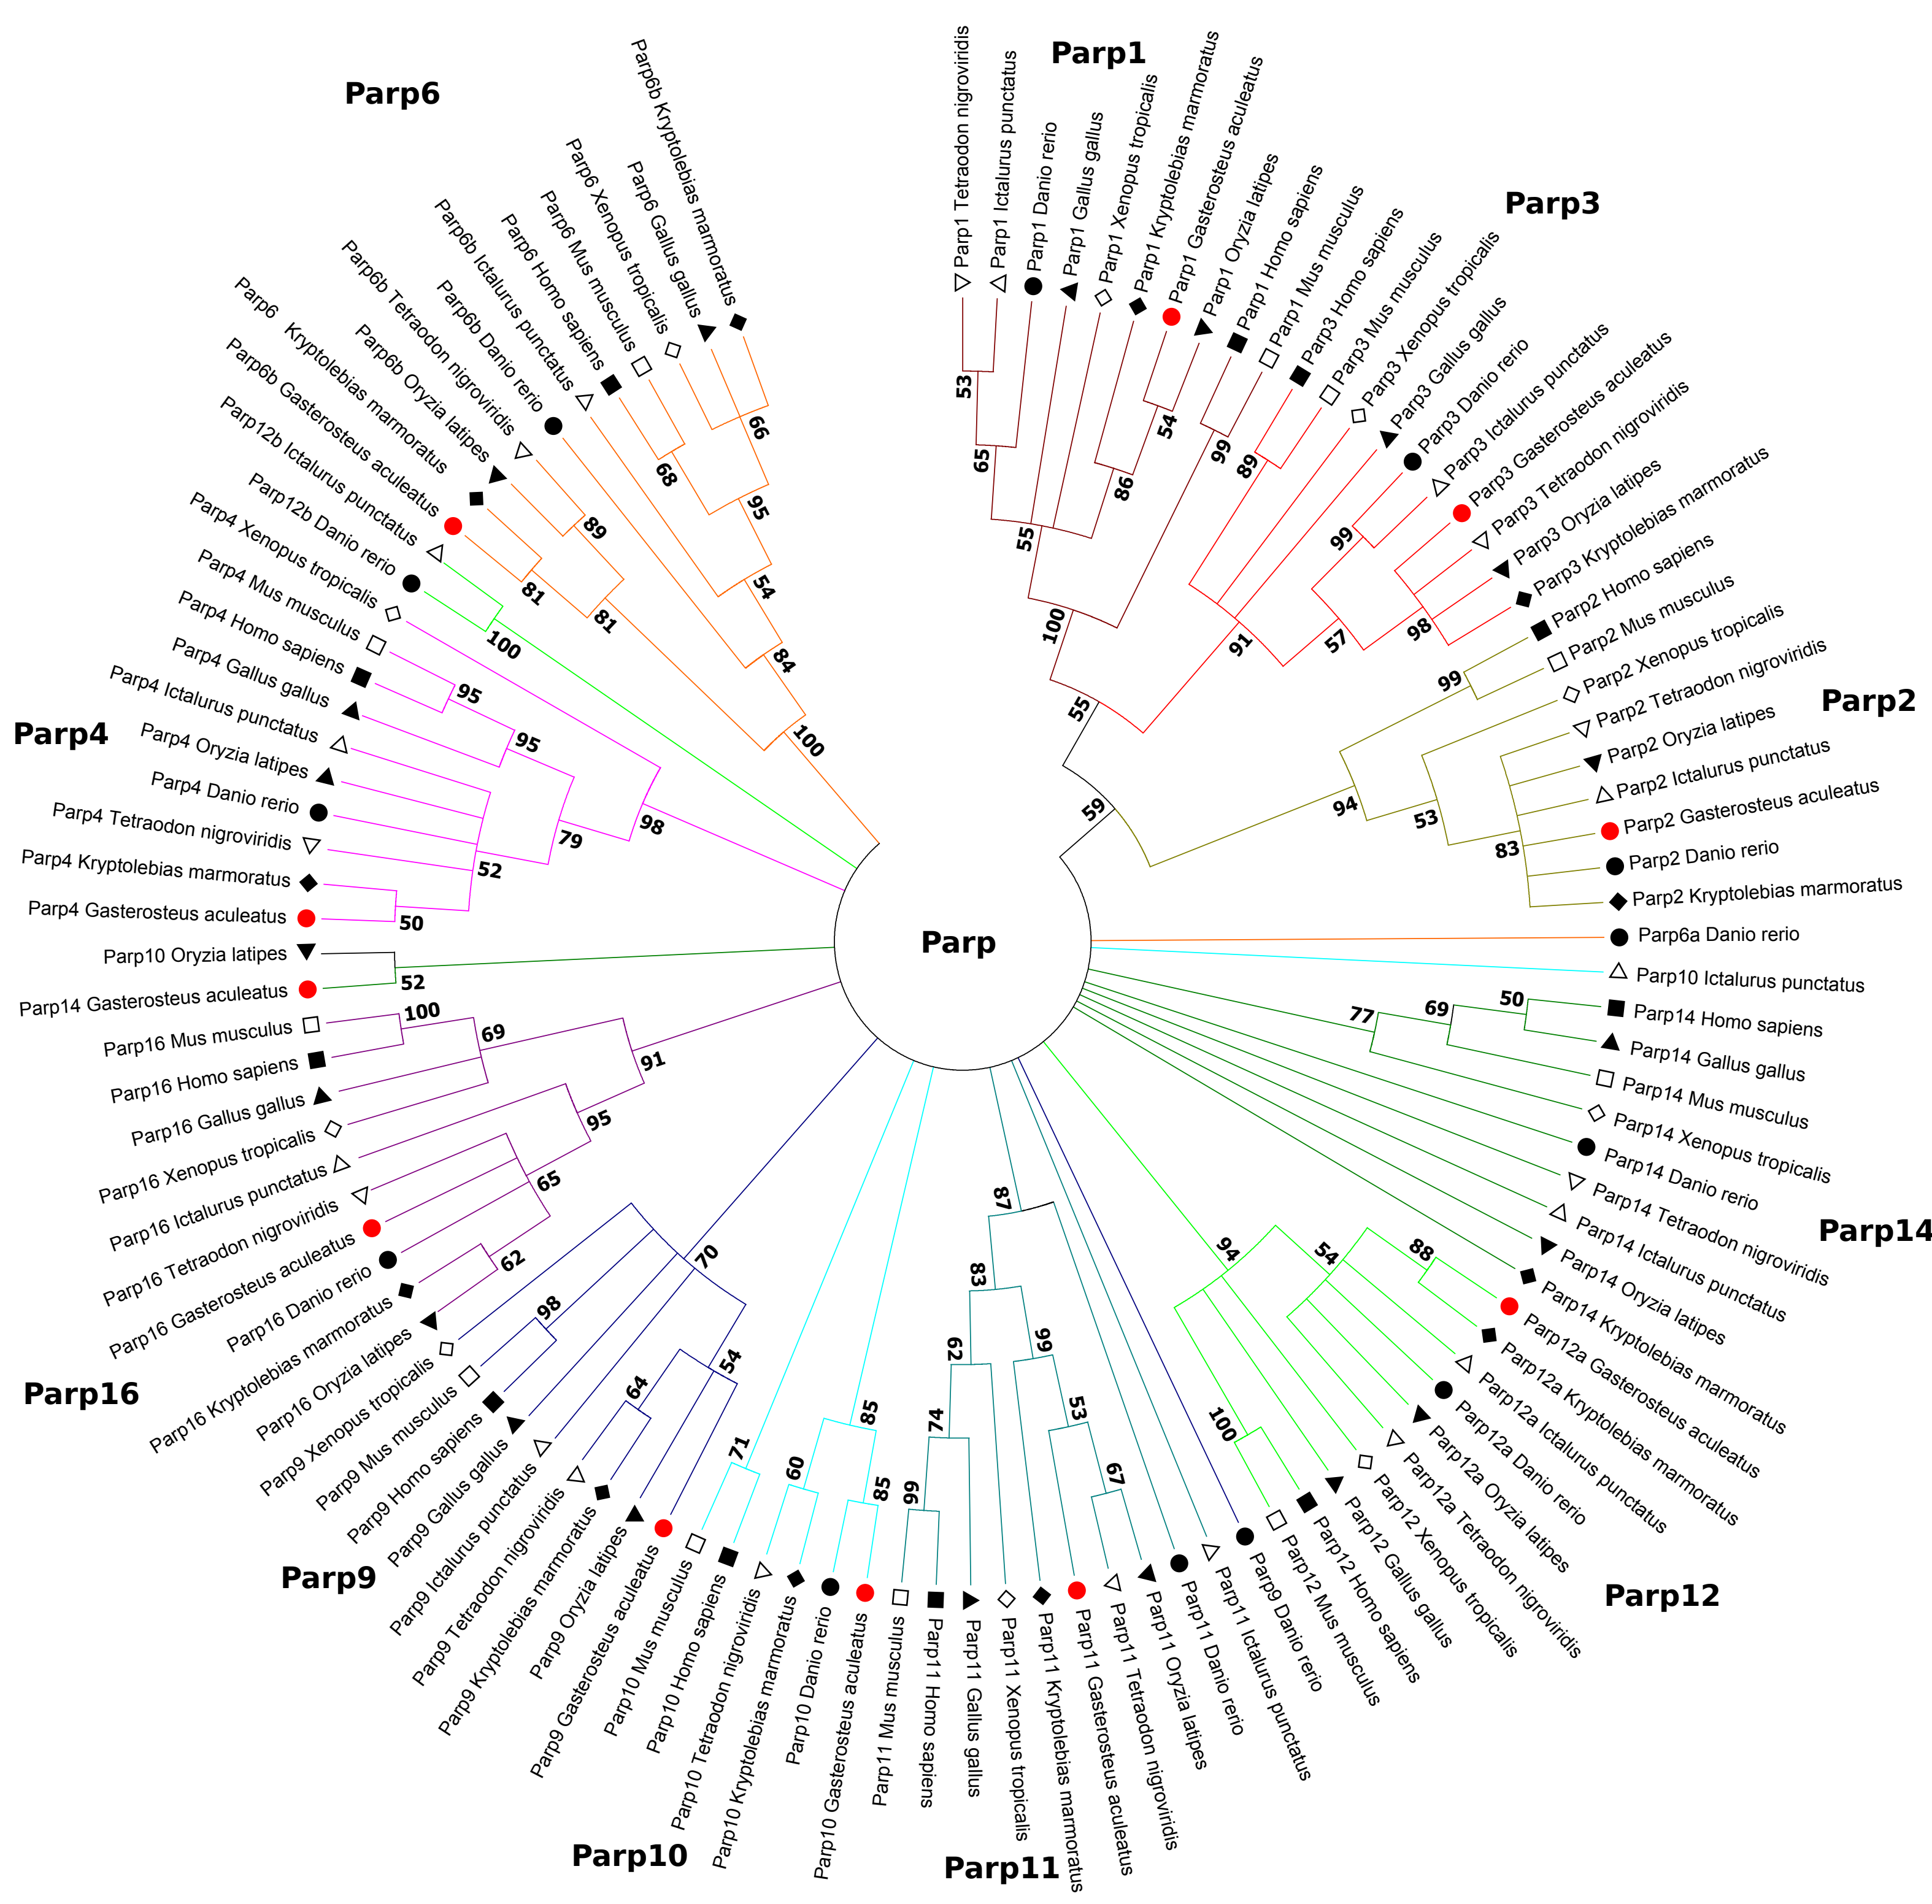

Supplement: Supplementary file 13 [file 18946607]

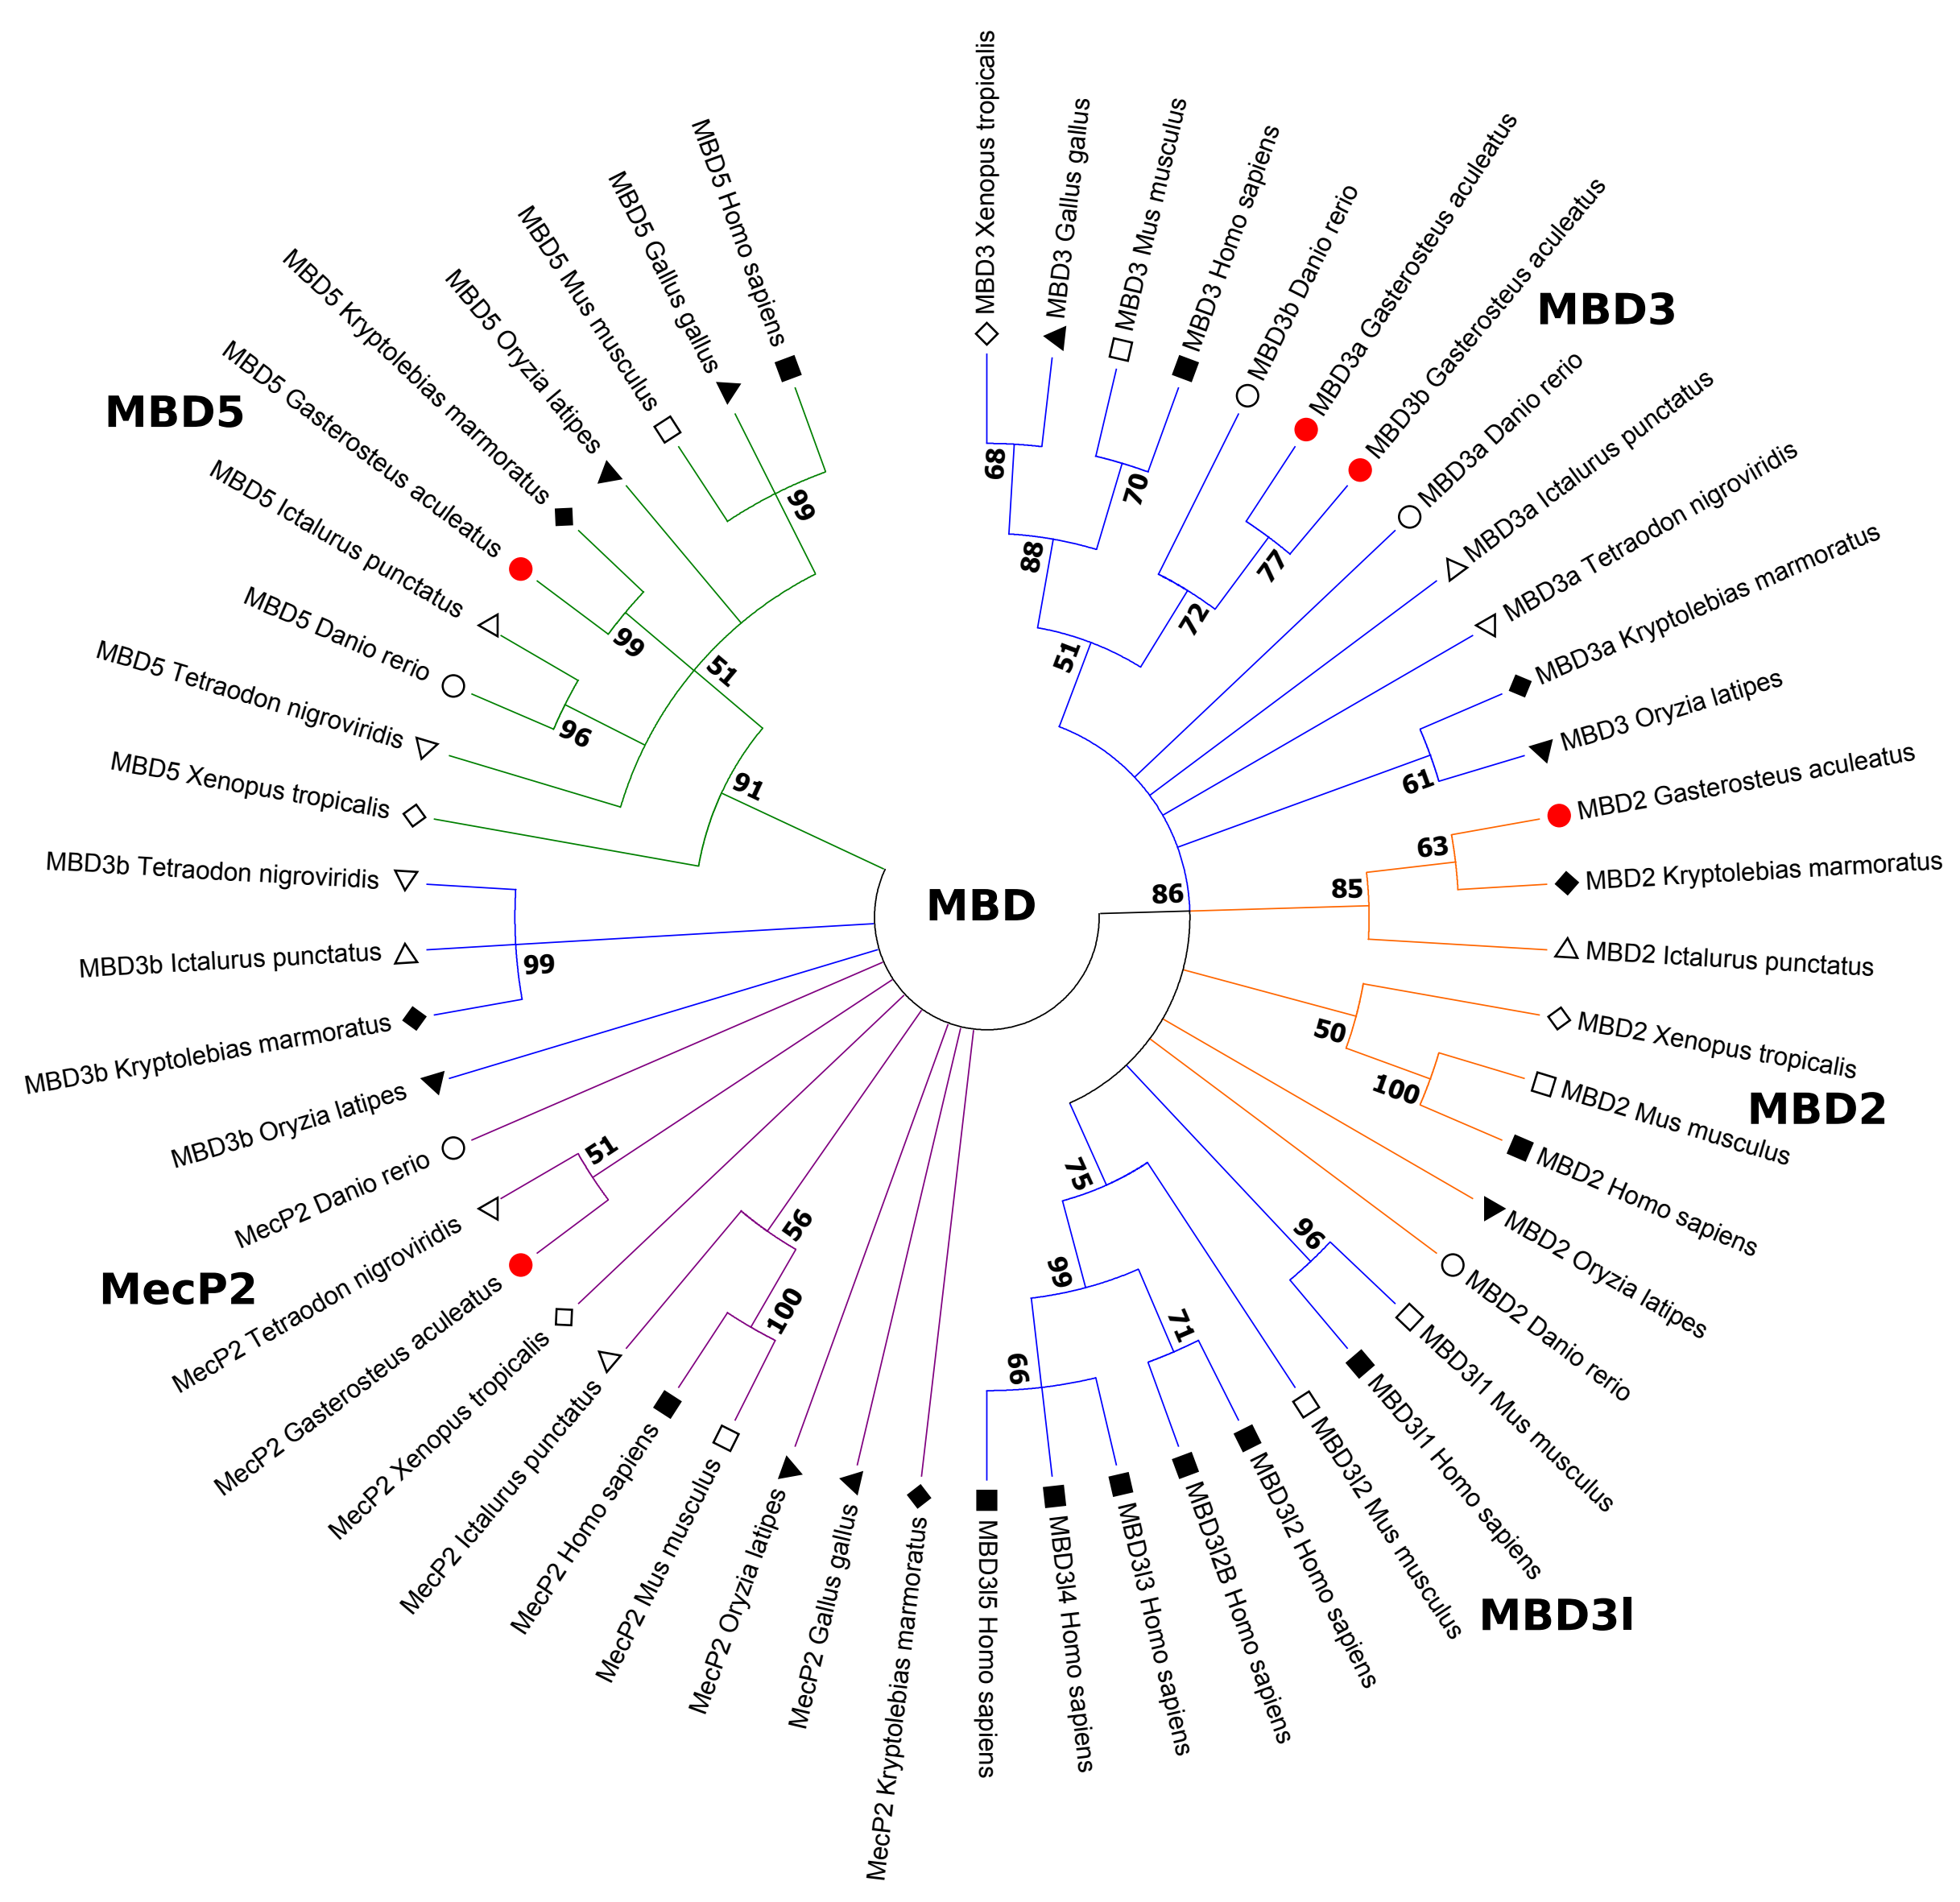

Supplement: Supplementary file 14 [file 18946607]

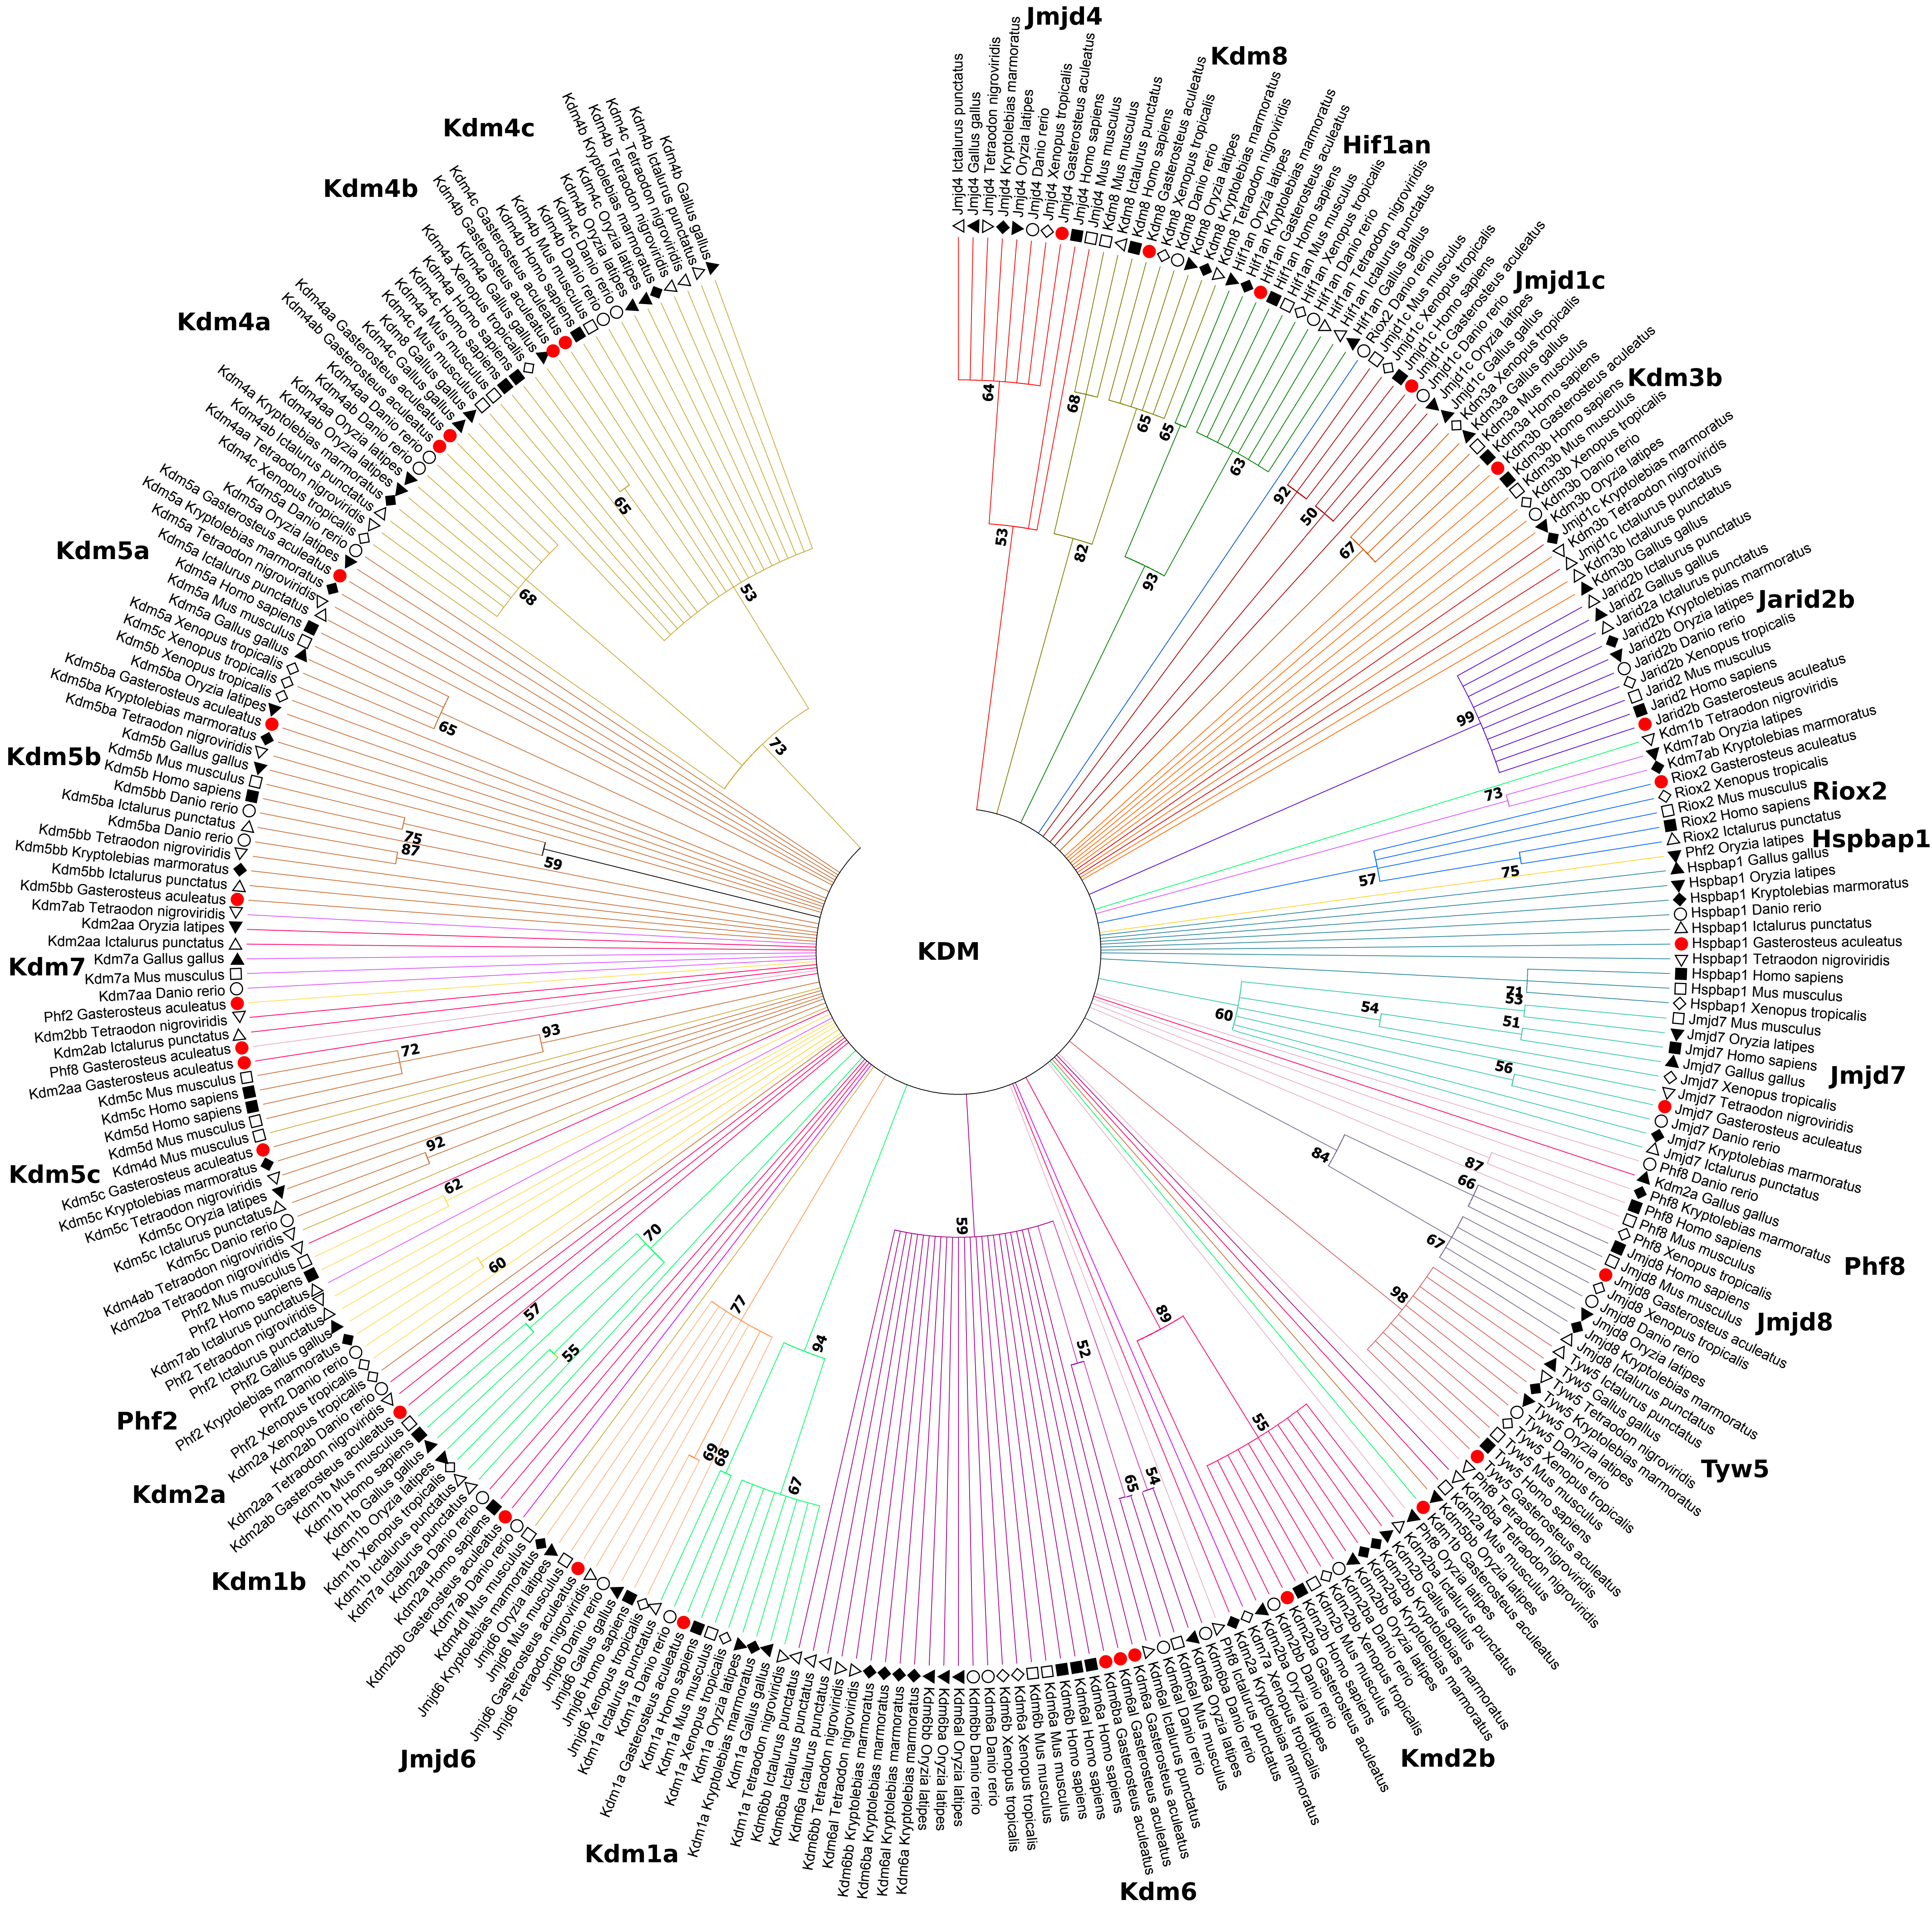

Supplement: Supplementary file 15 [file 18946607]

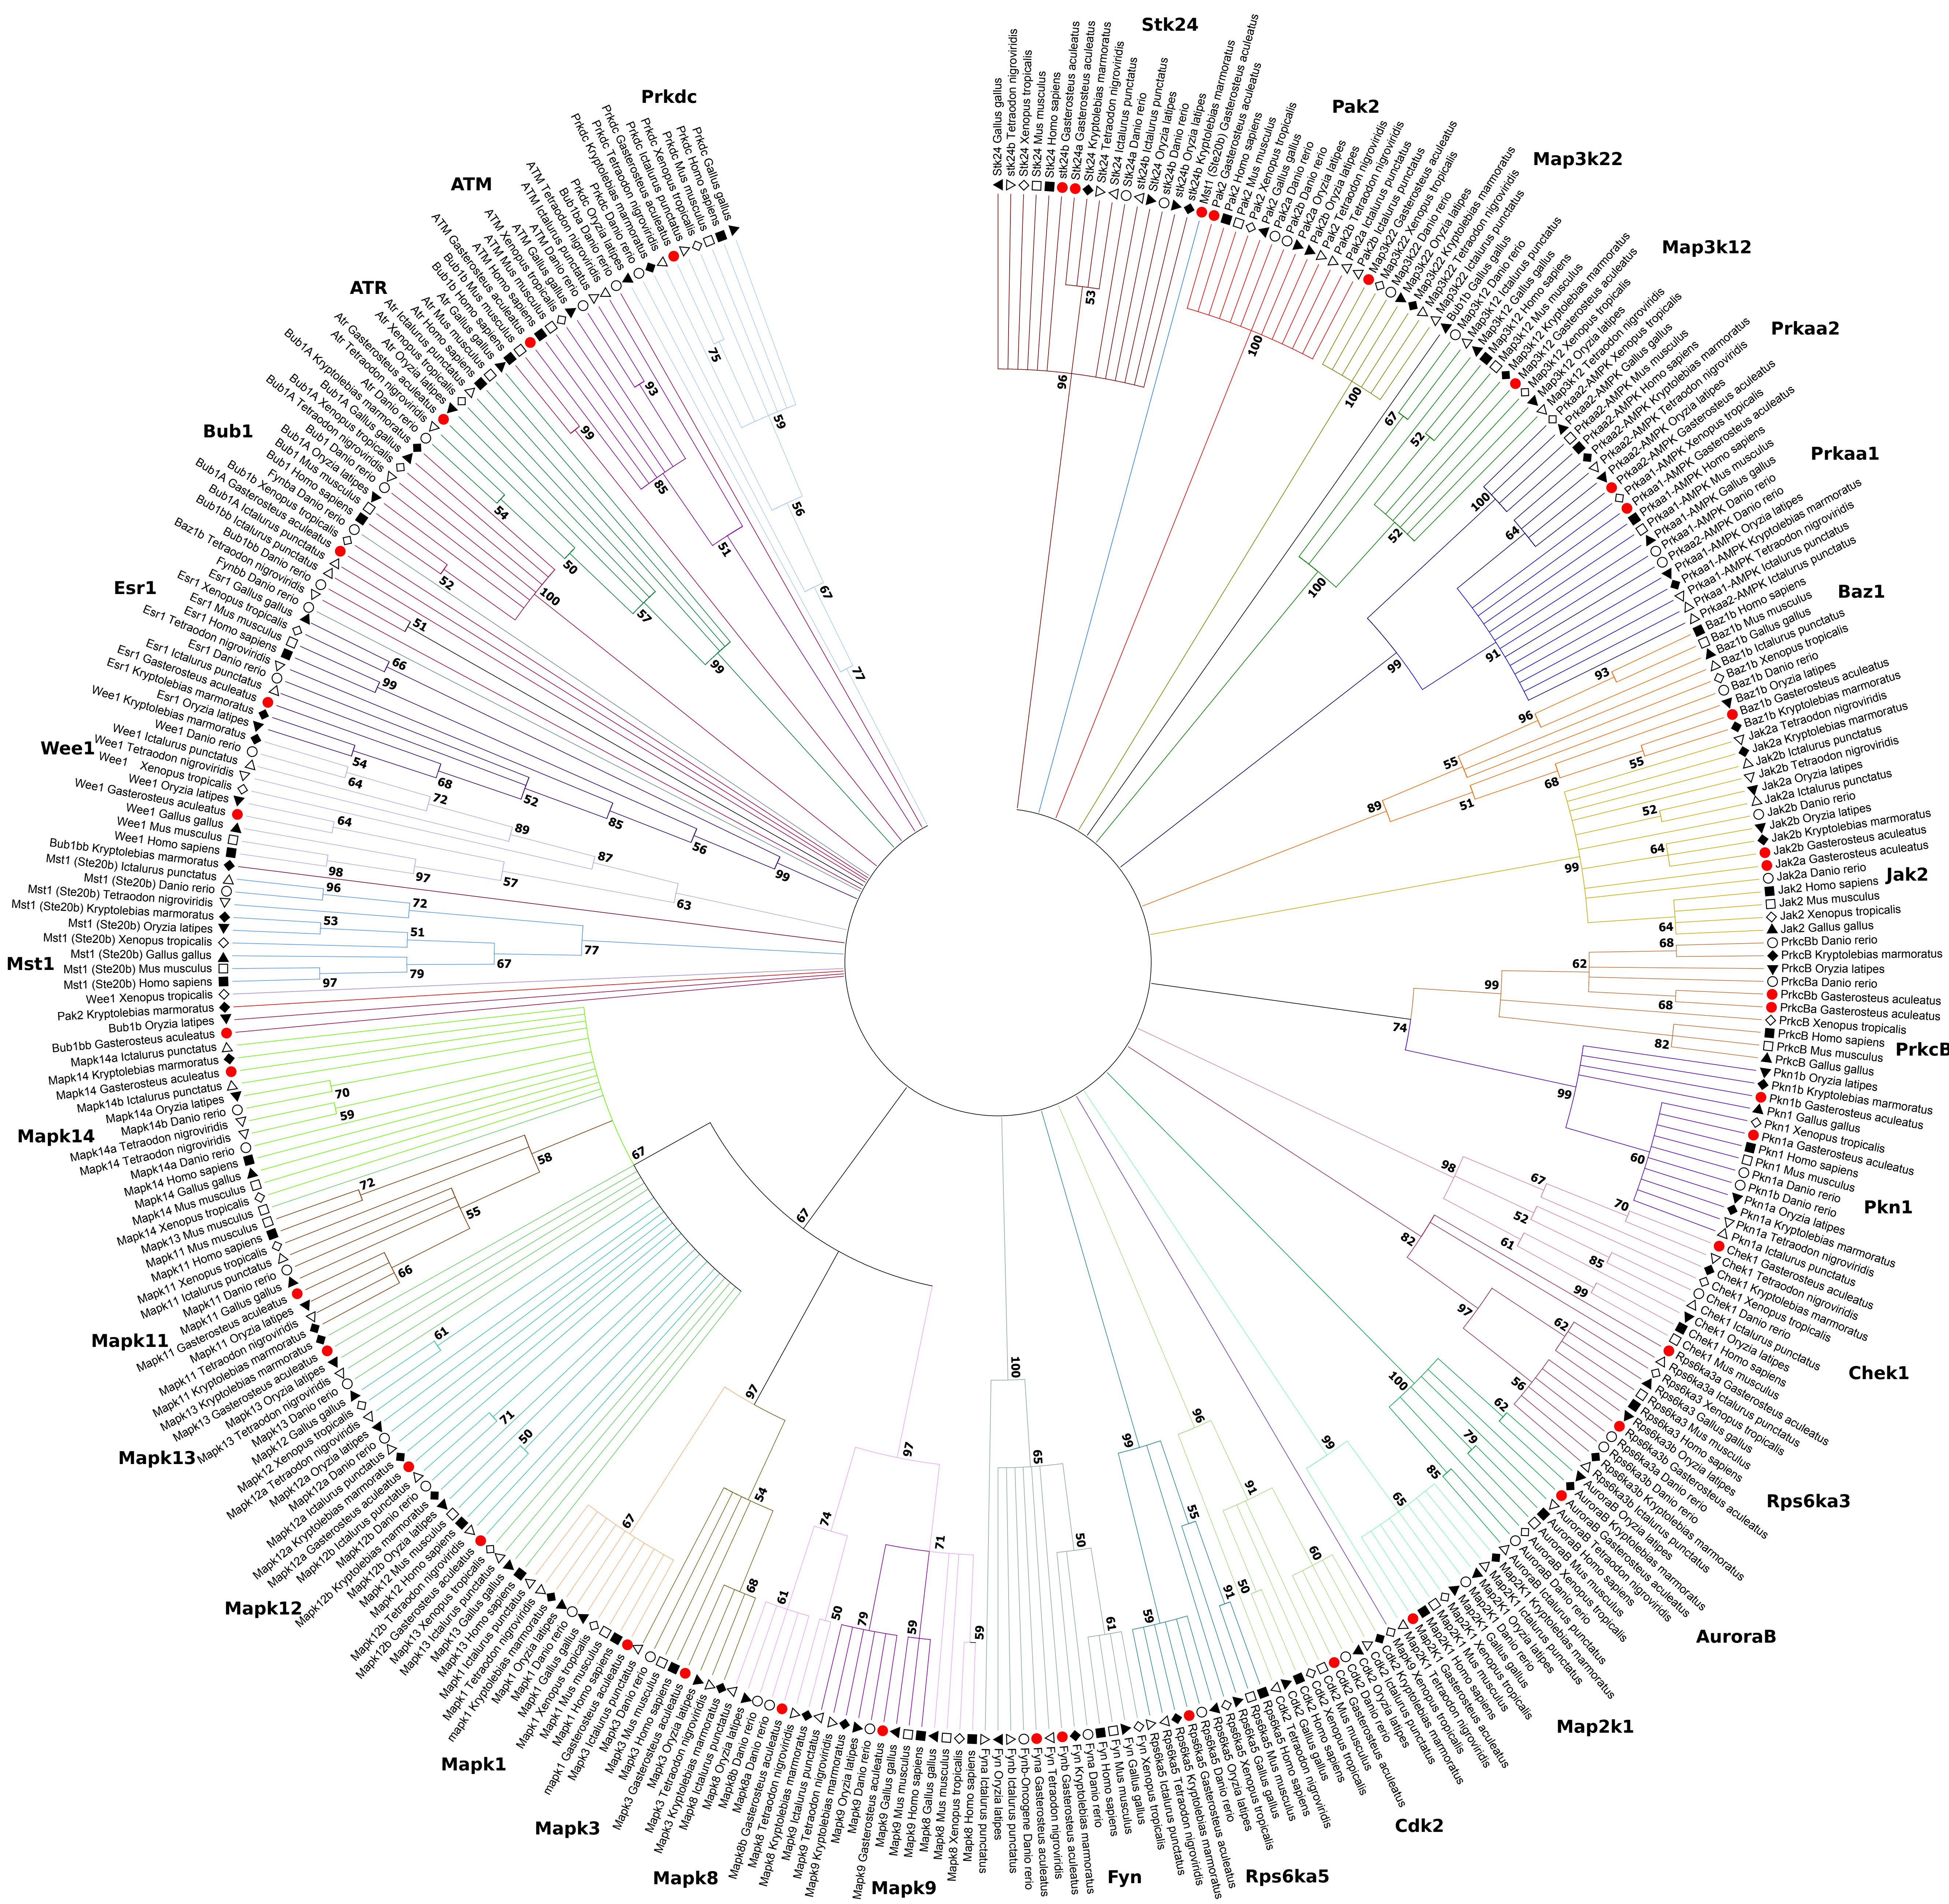

Supplement: Supplementary file 16 [file 18946607]

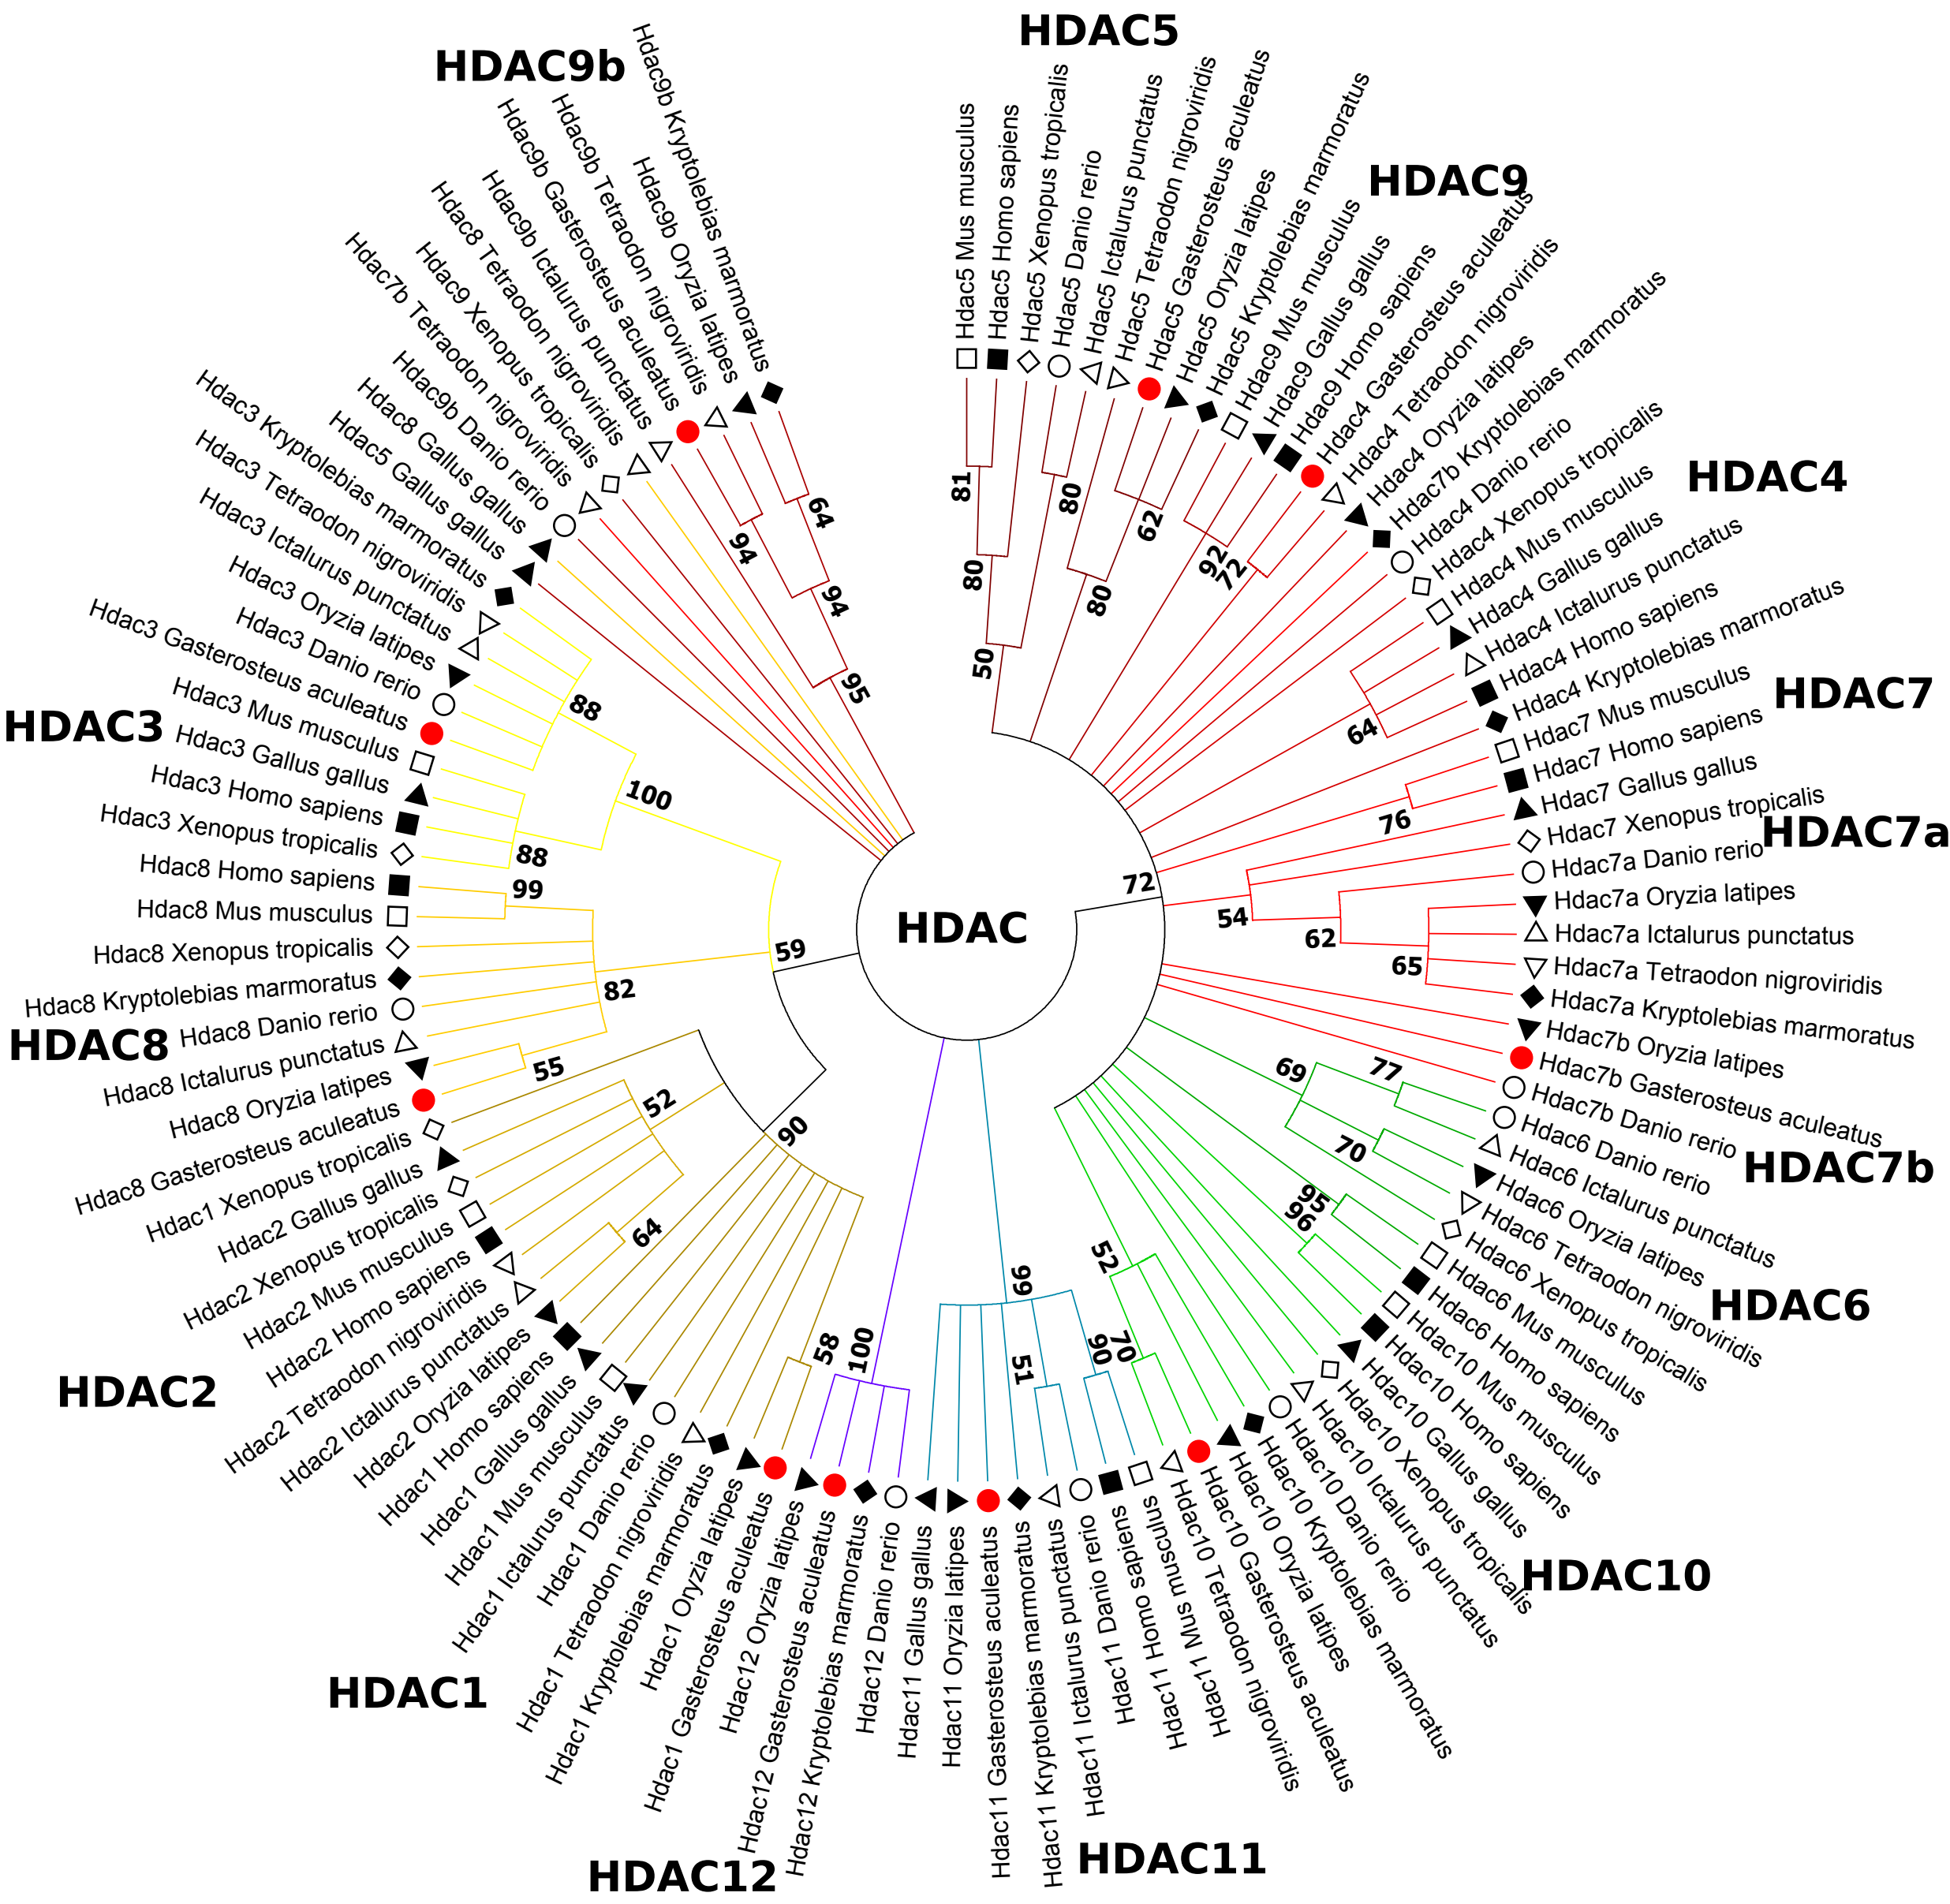

Supplement: Supplementary file 17 [file 18946607]

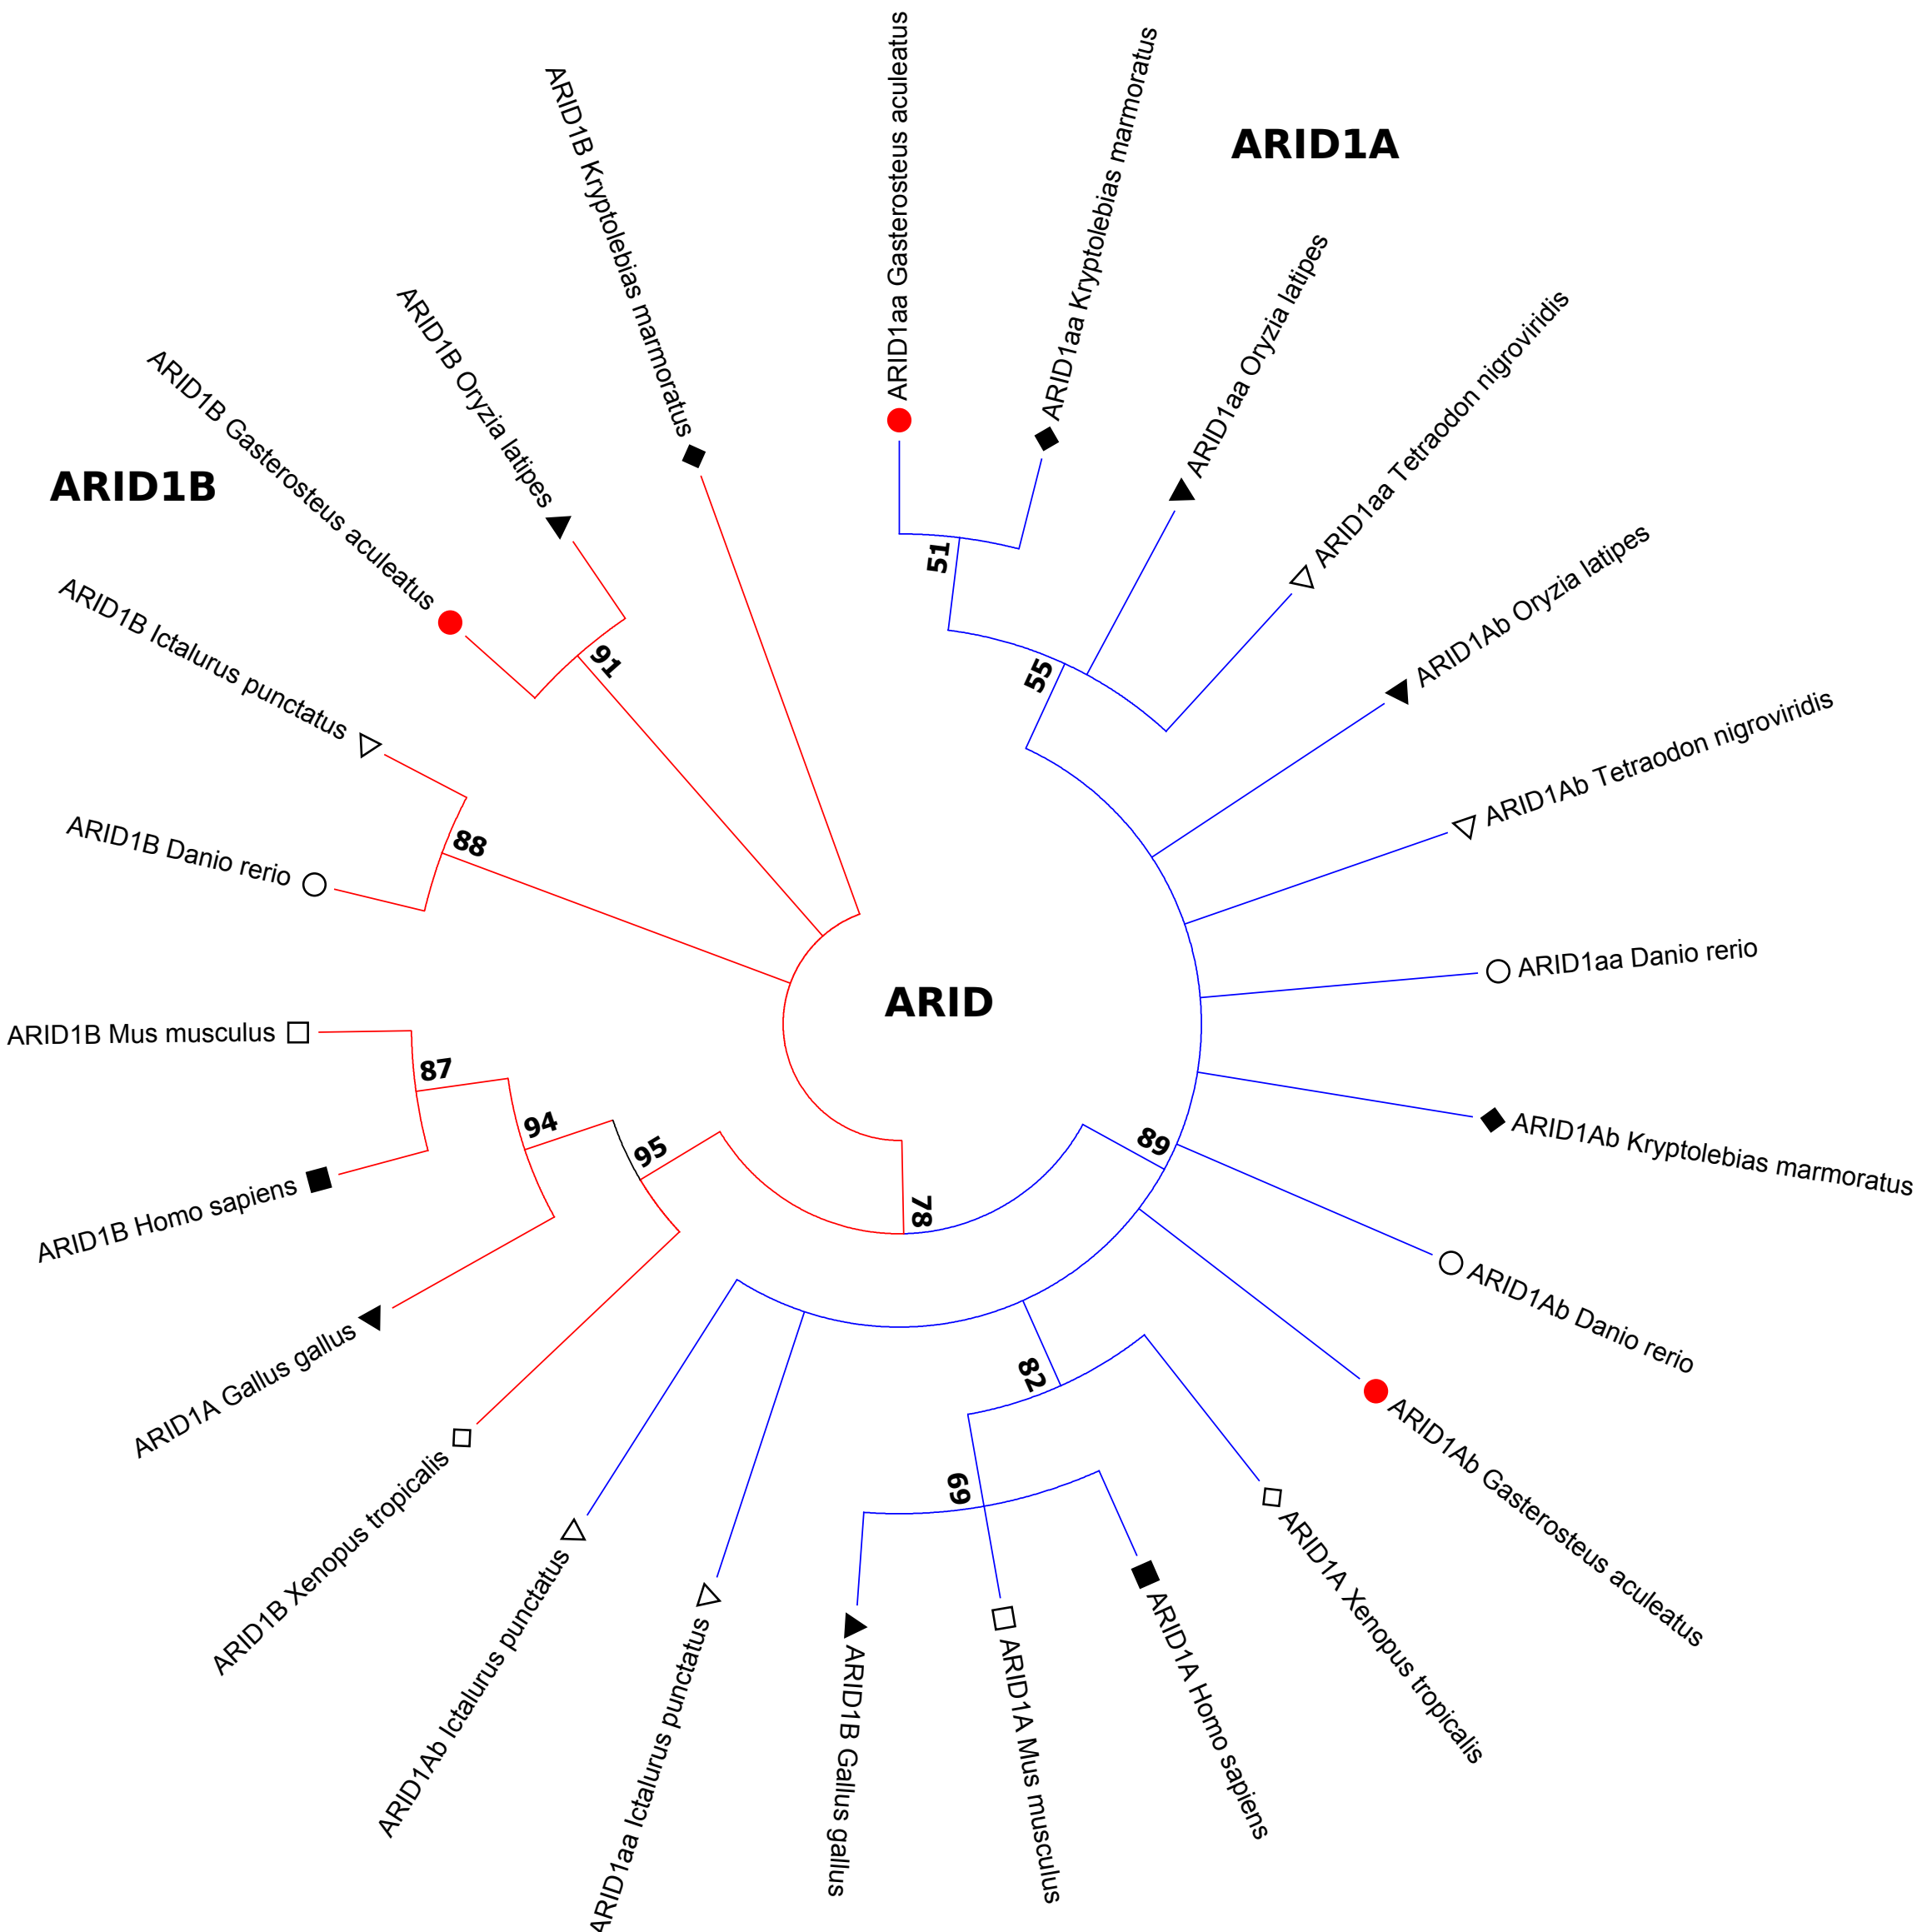

Supplement: Supplementary file 18 [file 18946607]

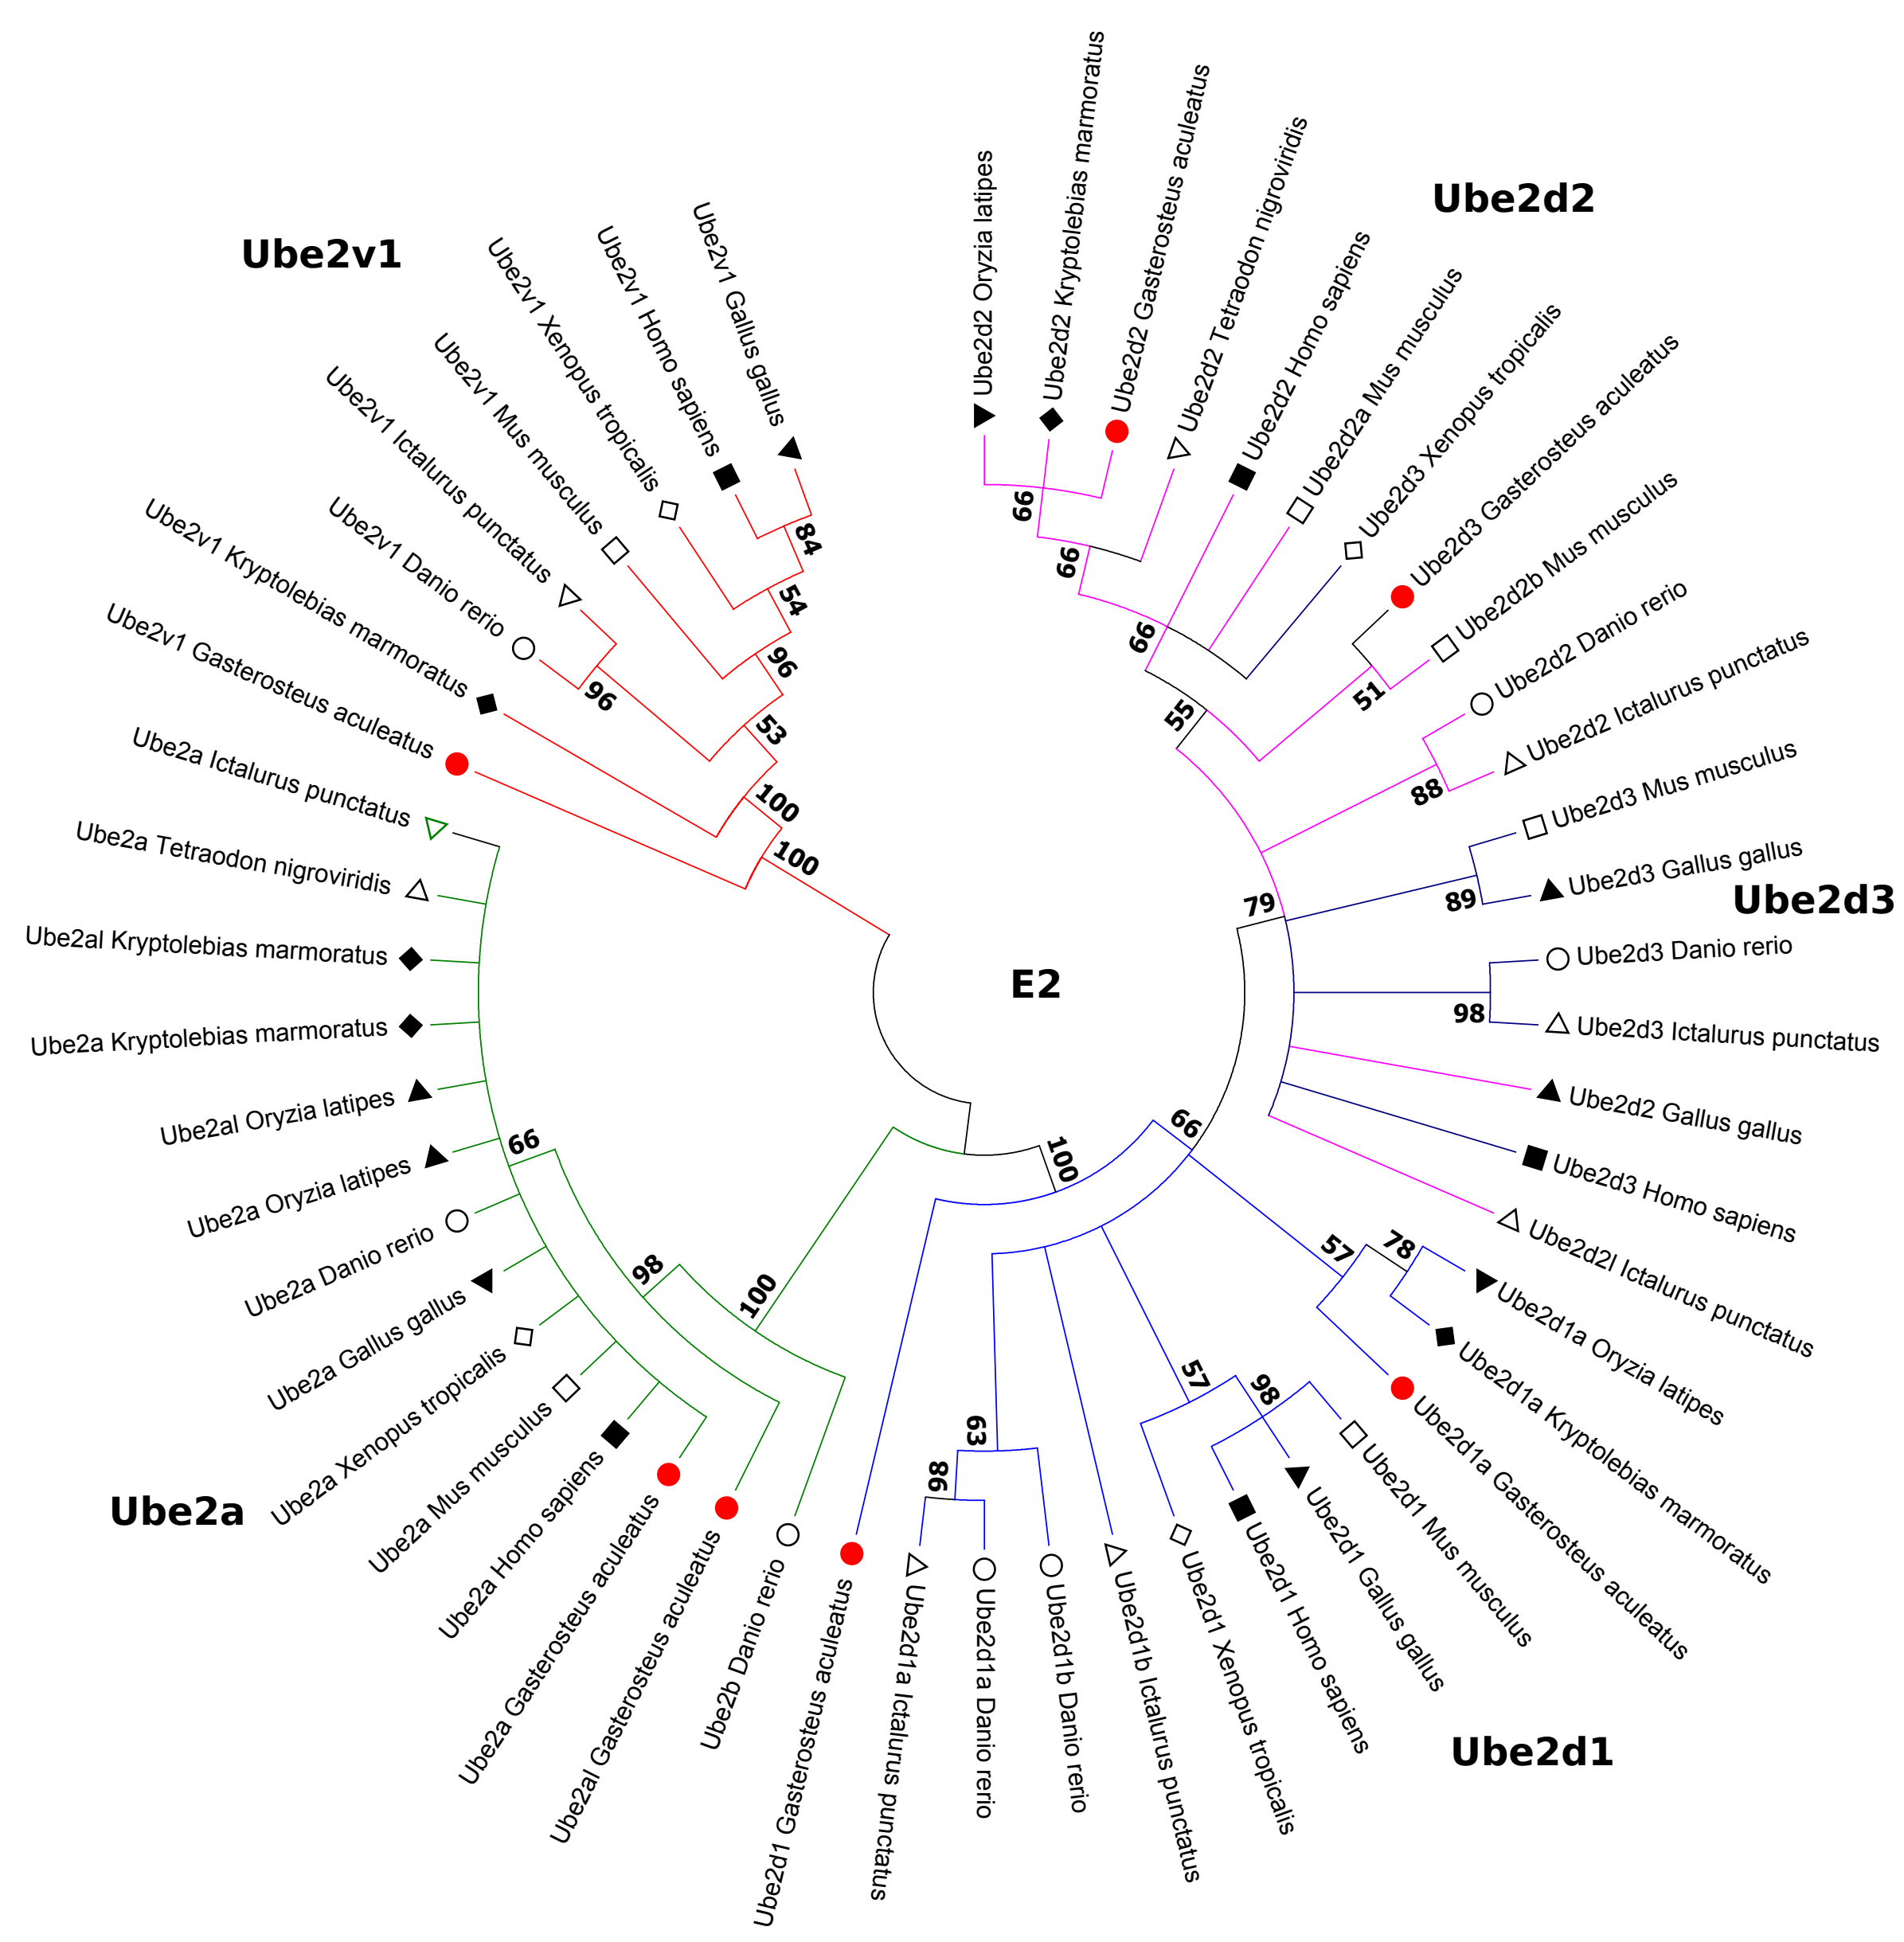

Supplement: Supplementary file 19 [file 18946607]

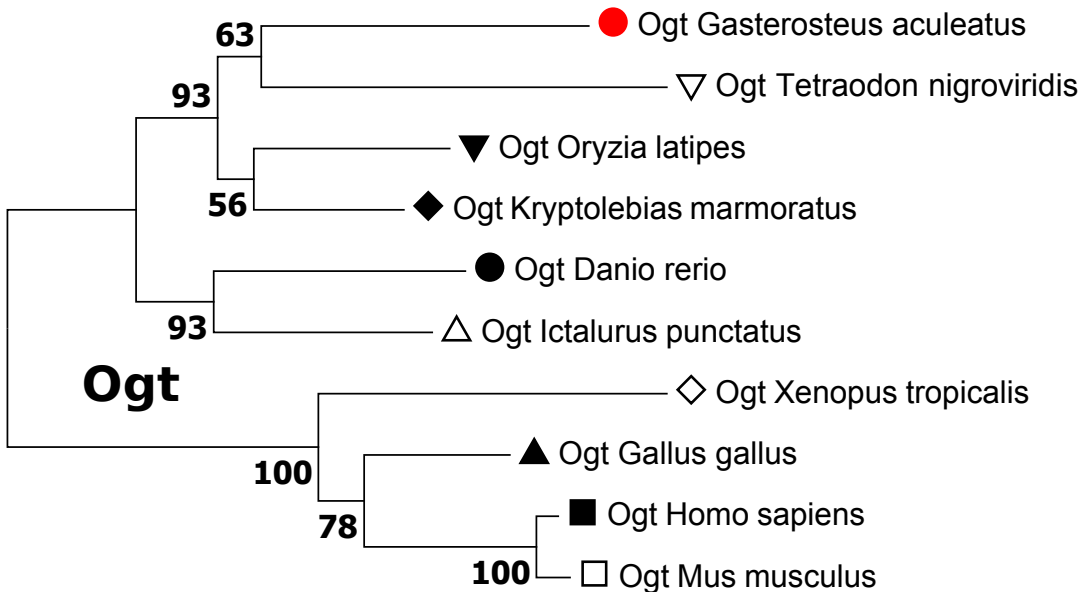

10

Supplement: Supplementary file 20 [file 18946607]

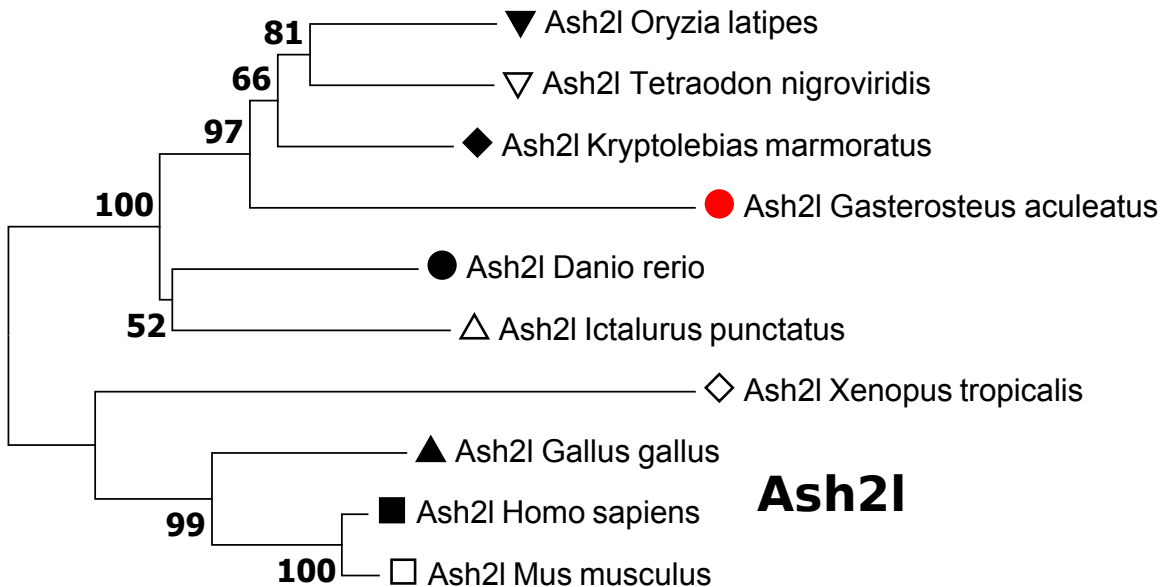

10

Supplement: Supplementary file 21 [file 18946607]

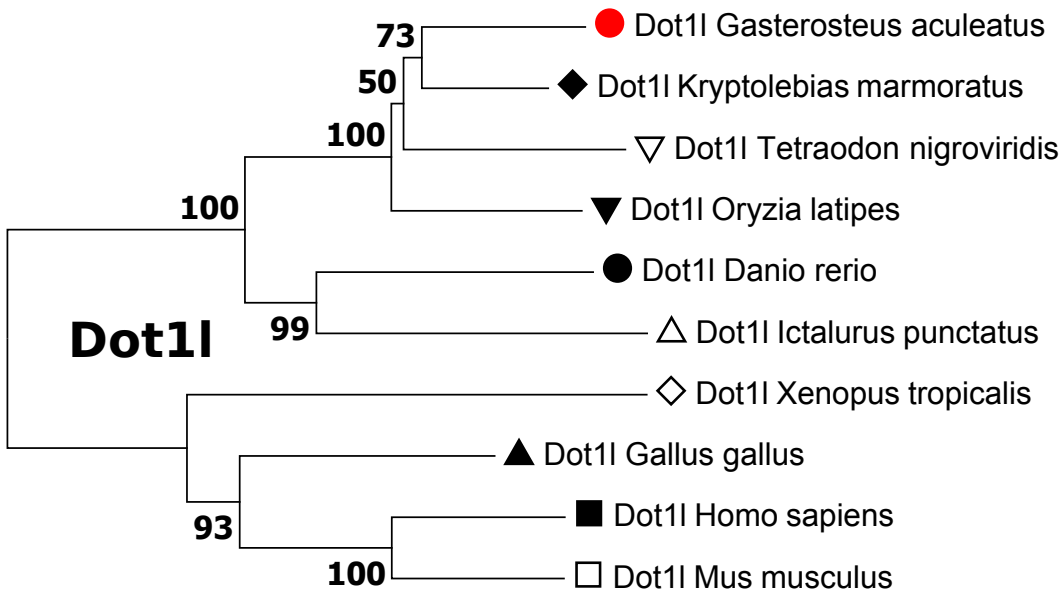

50

Supplement: Supplementary file 22 [file 18946607]

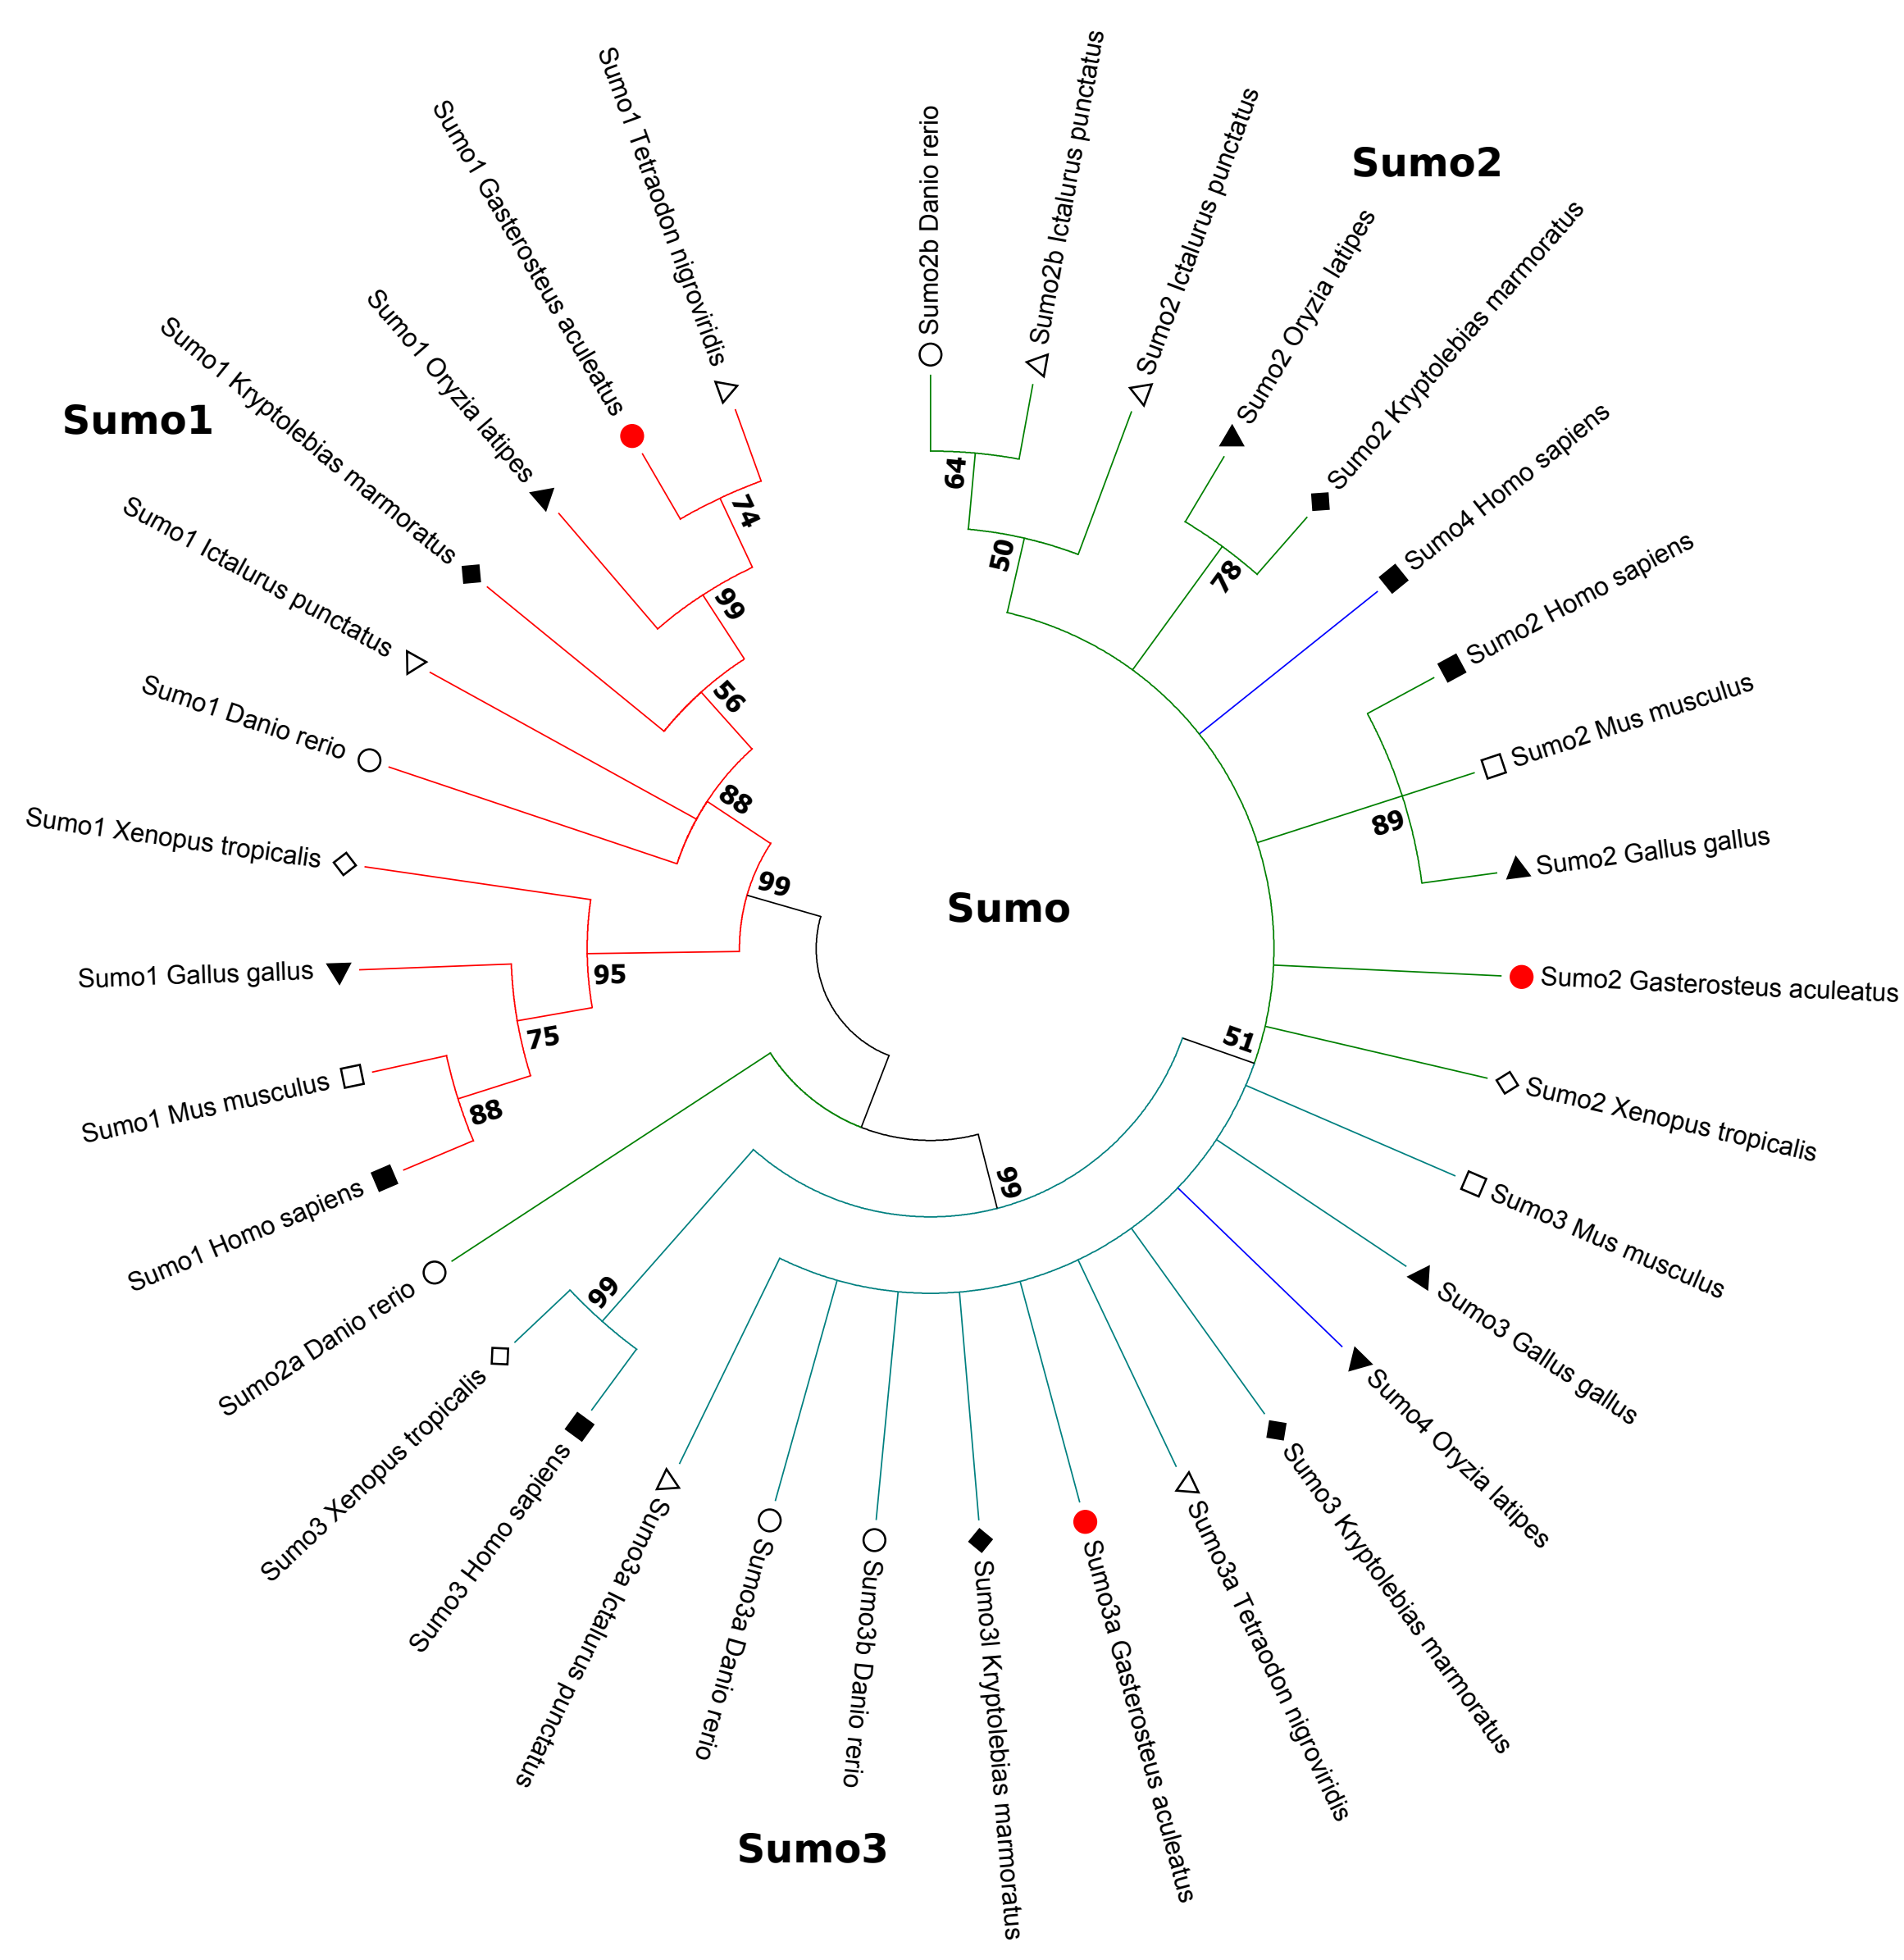

Supplement: Supplementary file 23 [file 18946607]

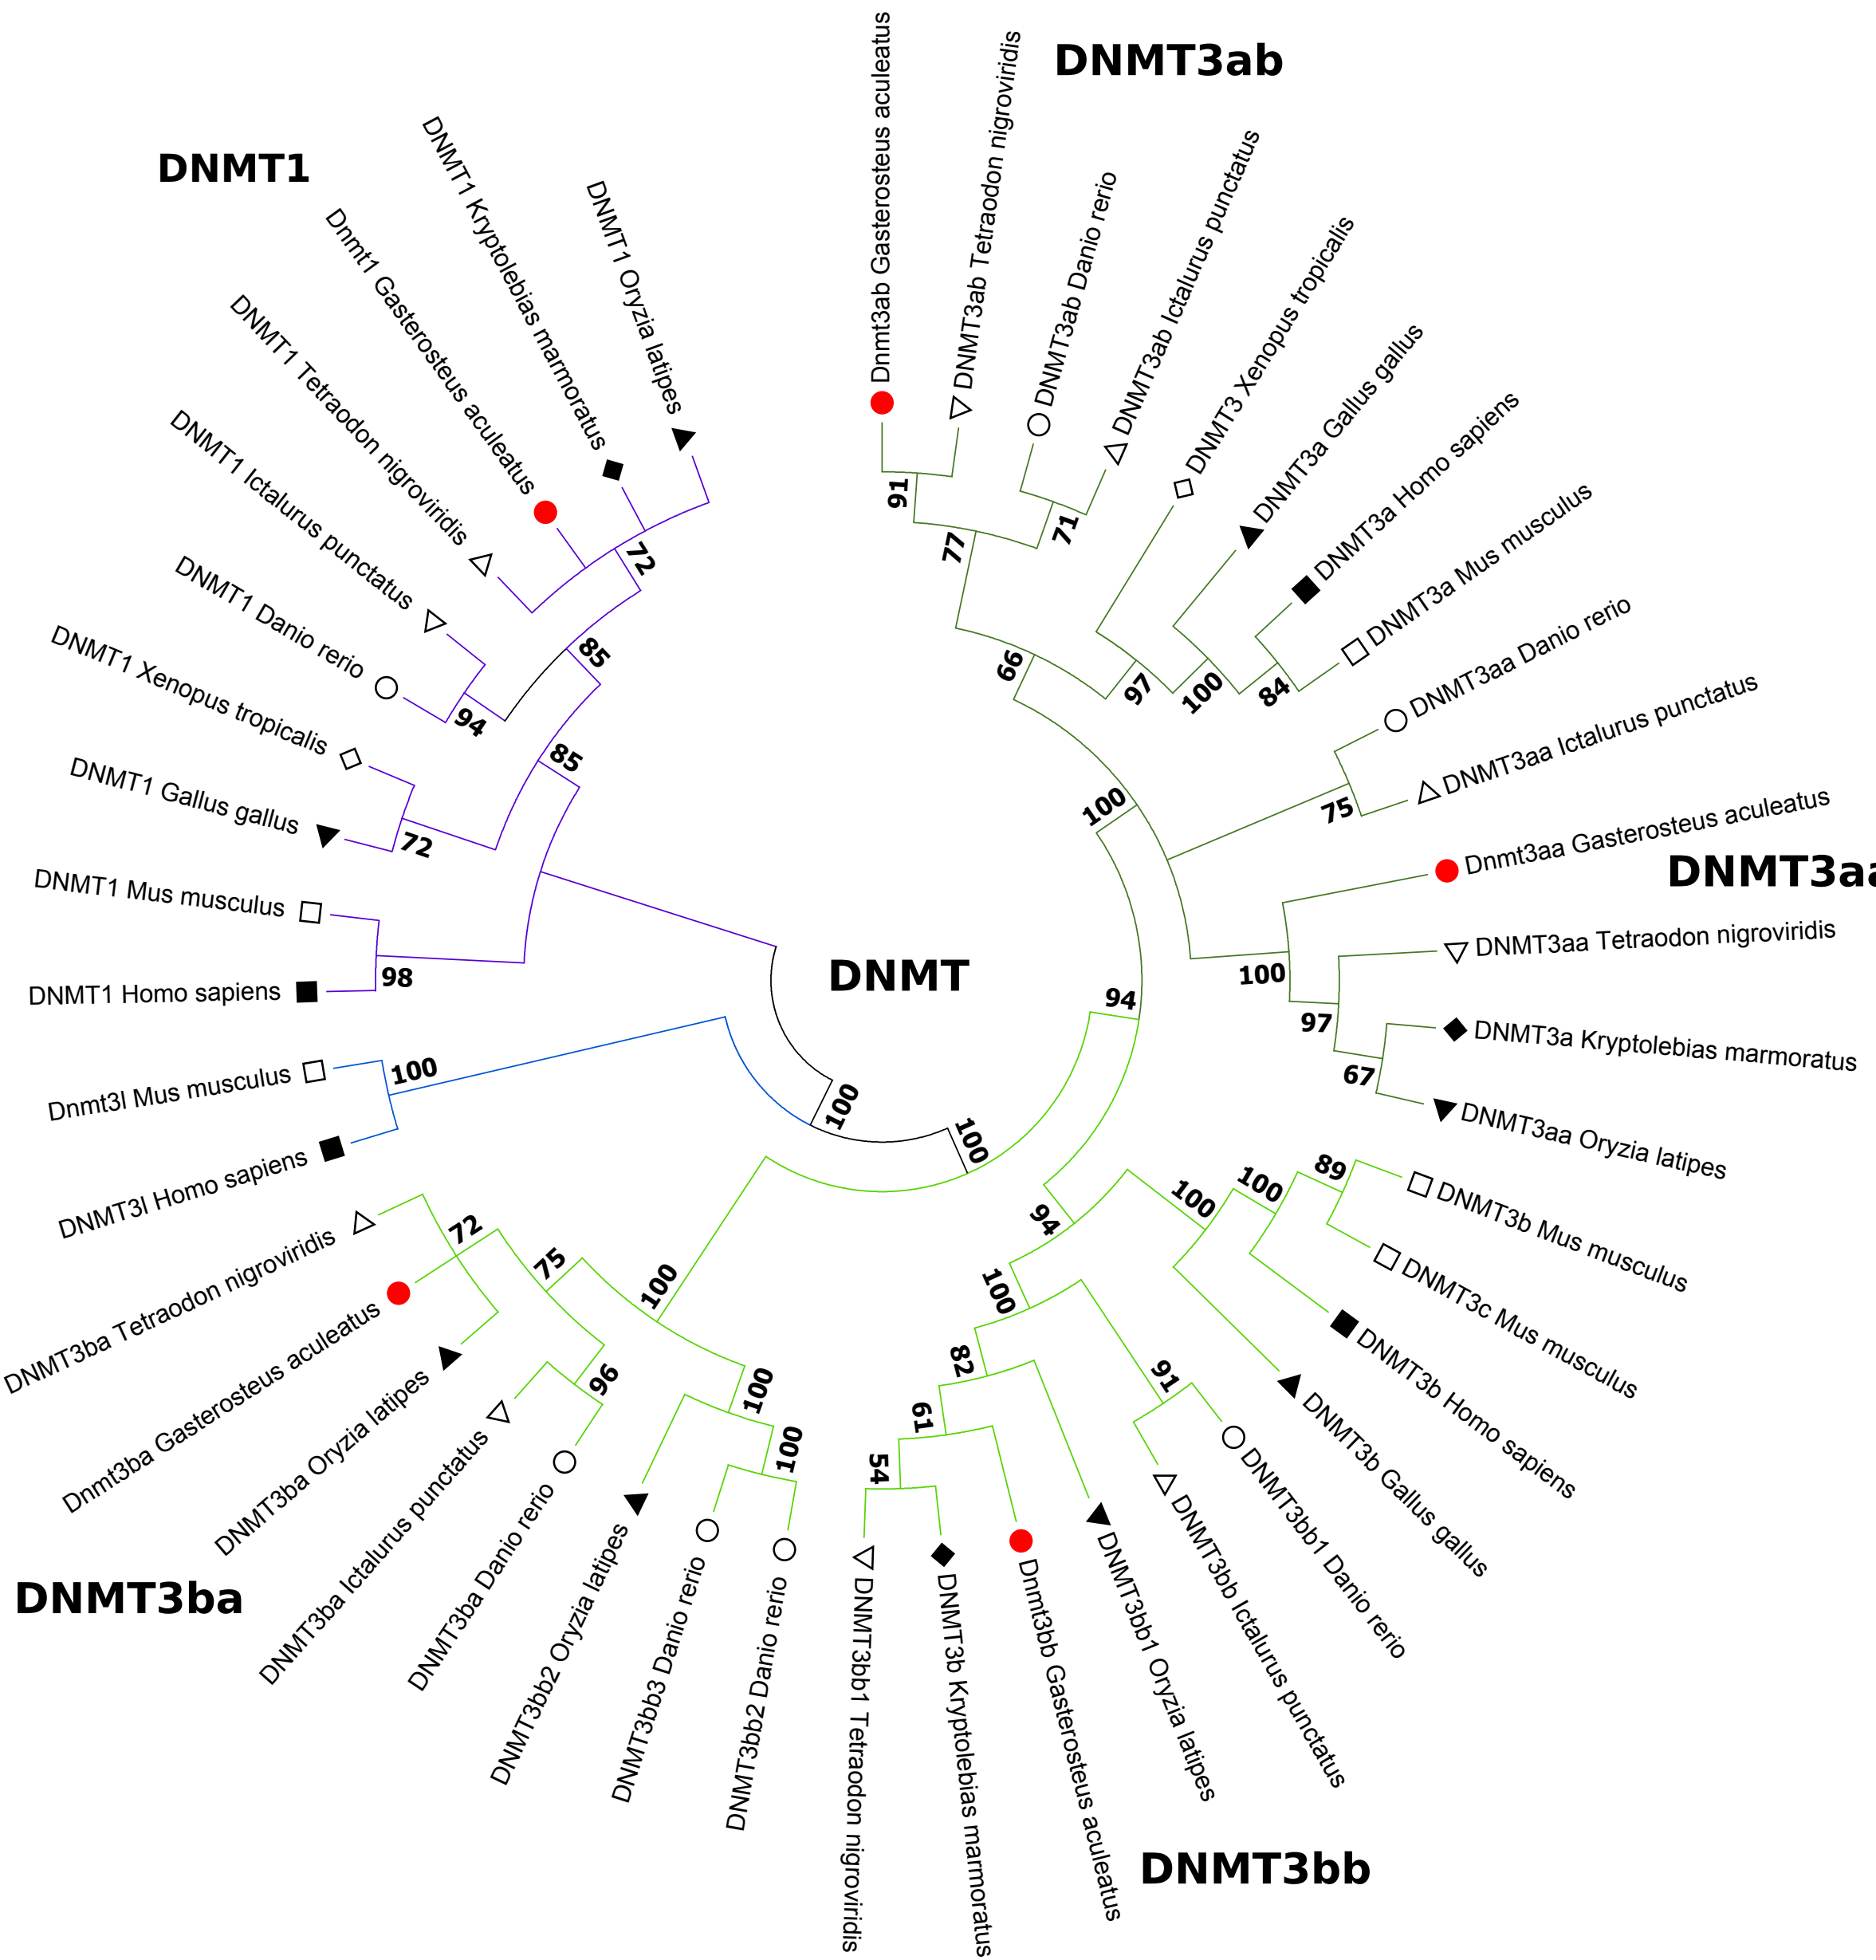

Supplement: Supplementary file 24 [file 18946607]

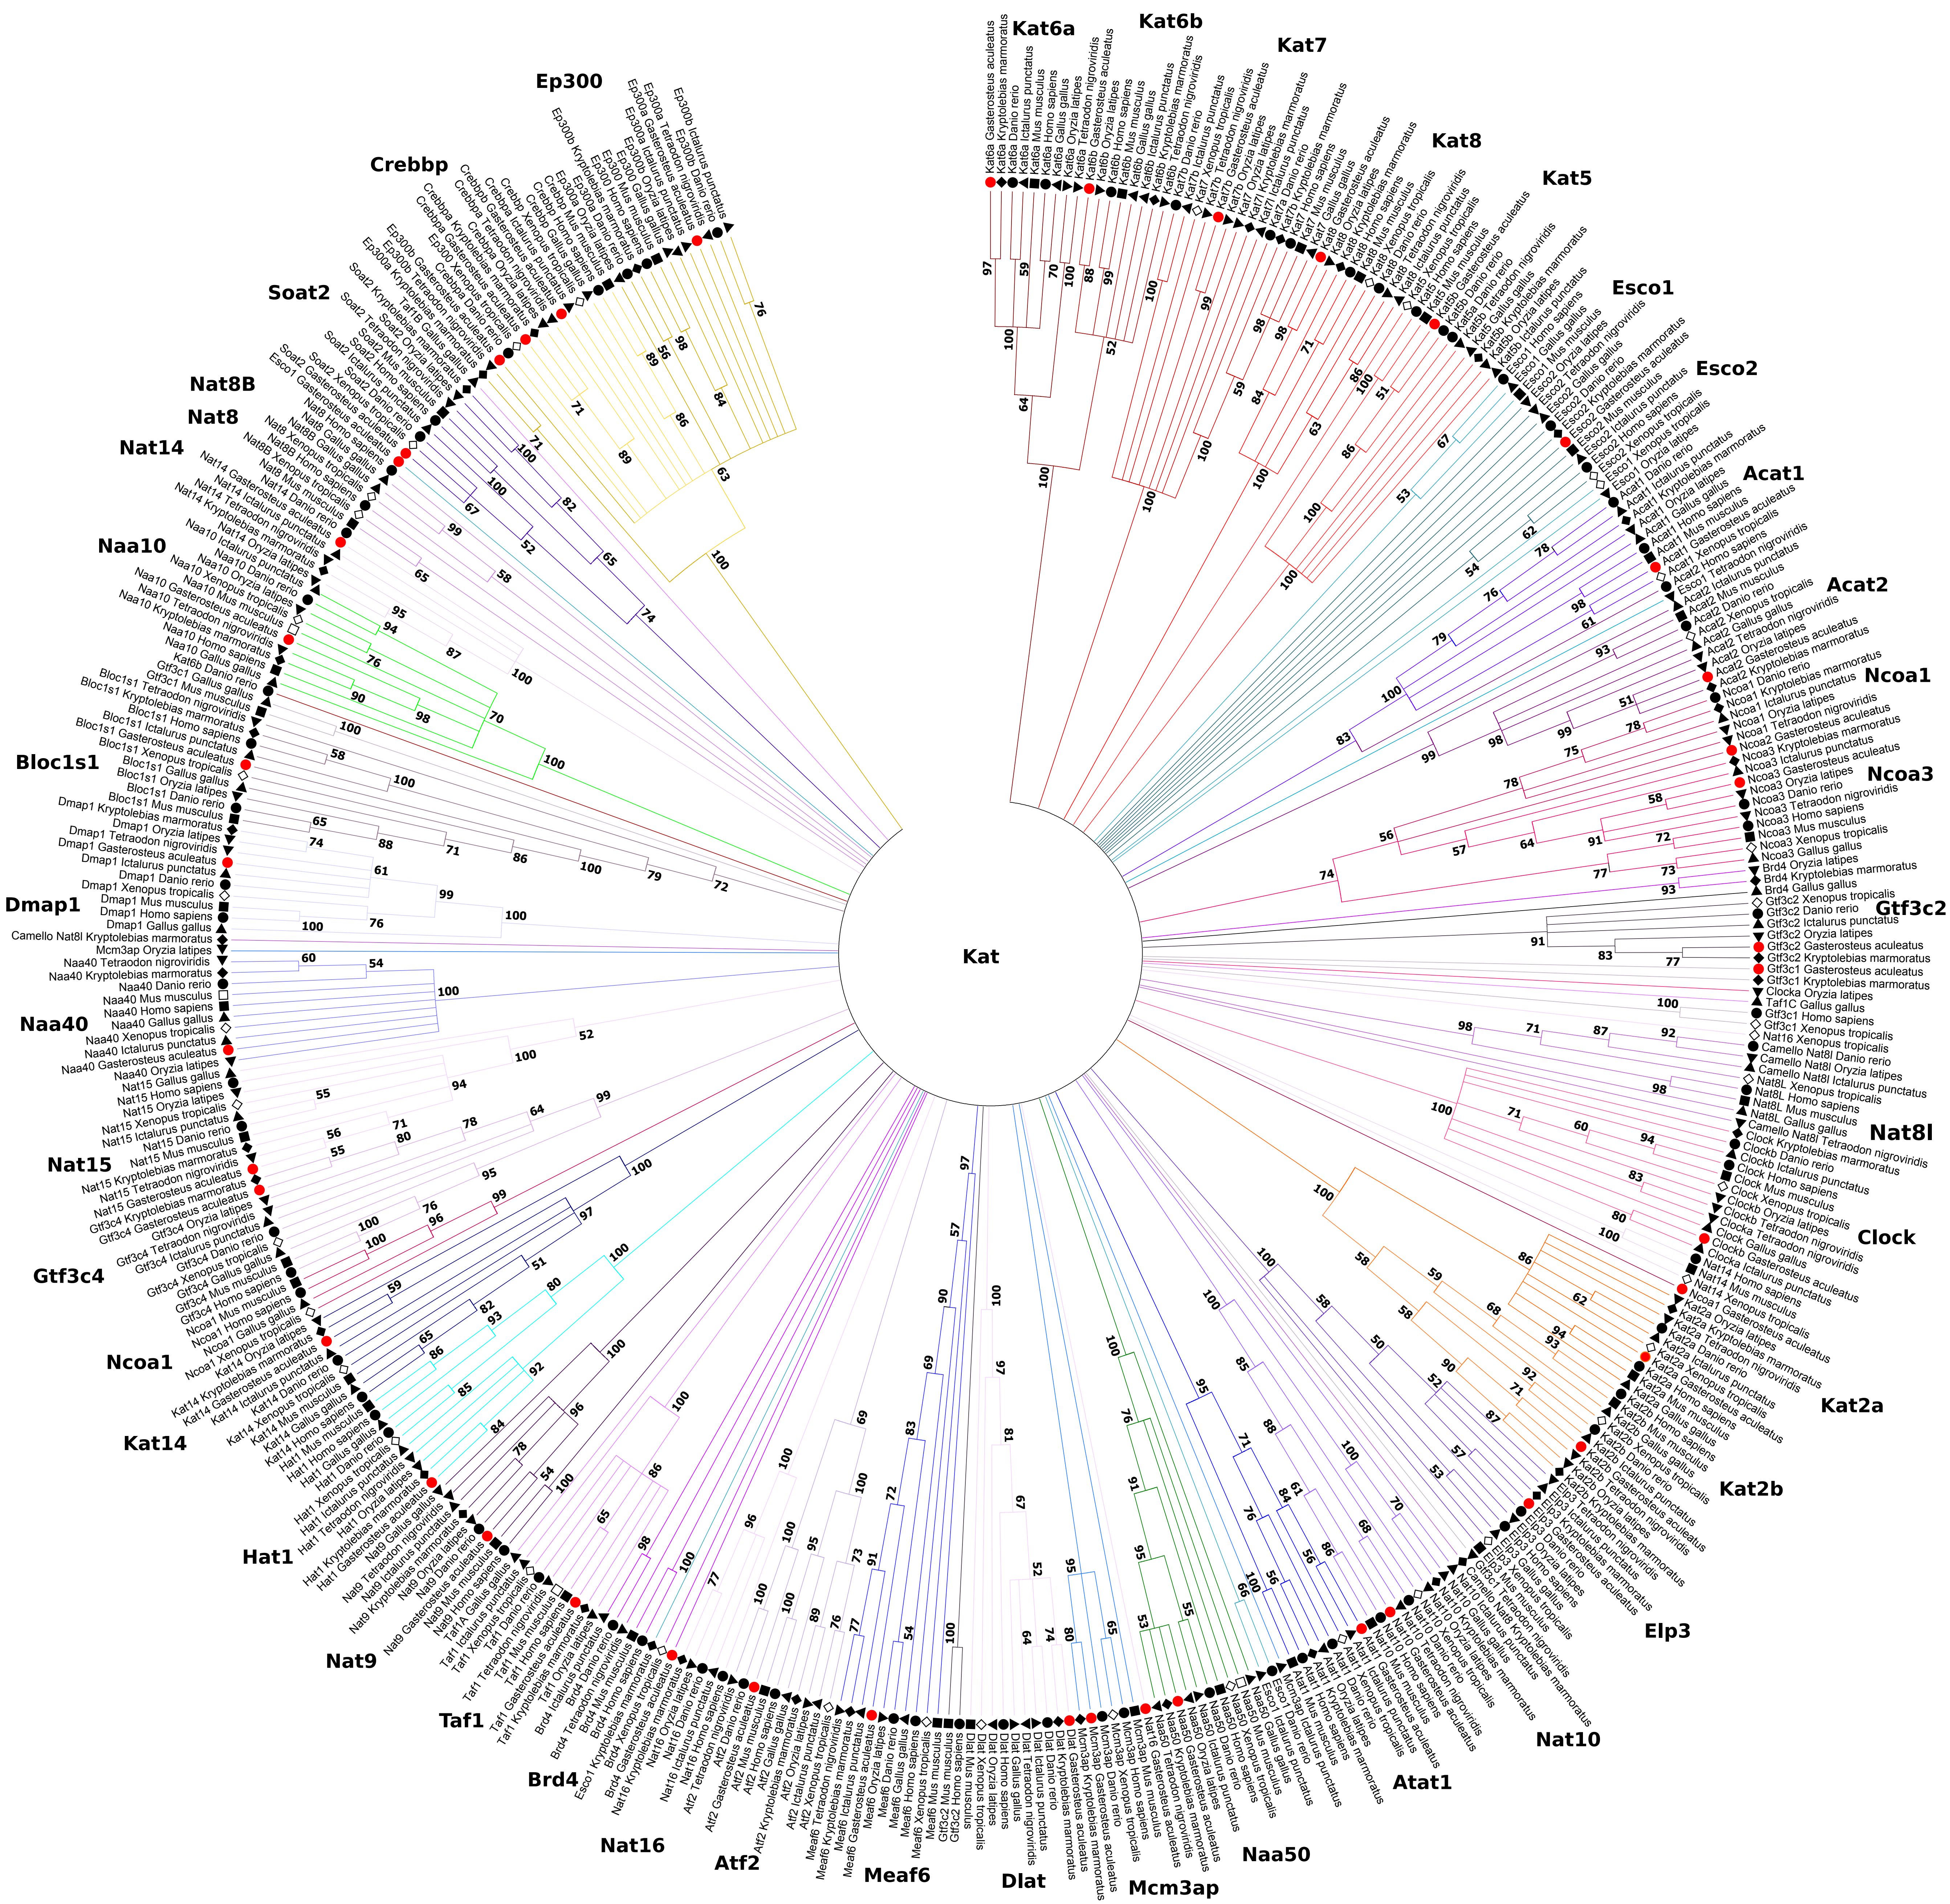

Supplement: Supplementary file 25 [file 18946607]

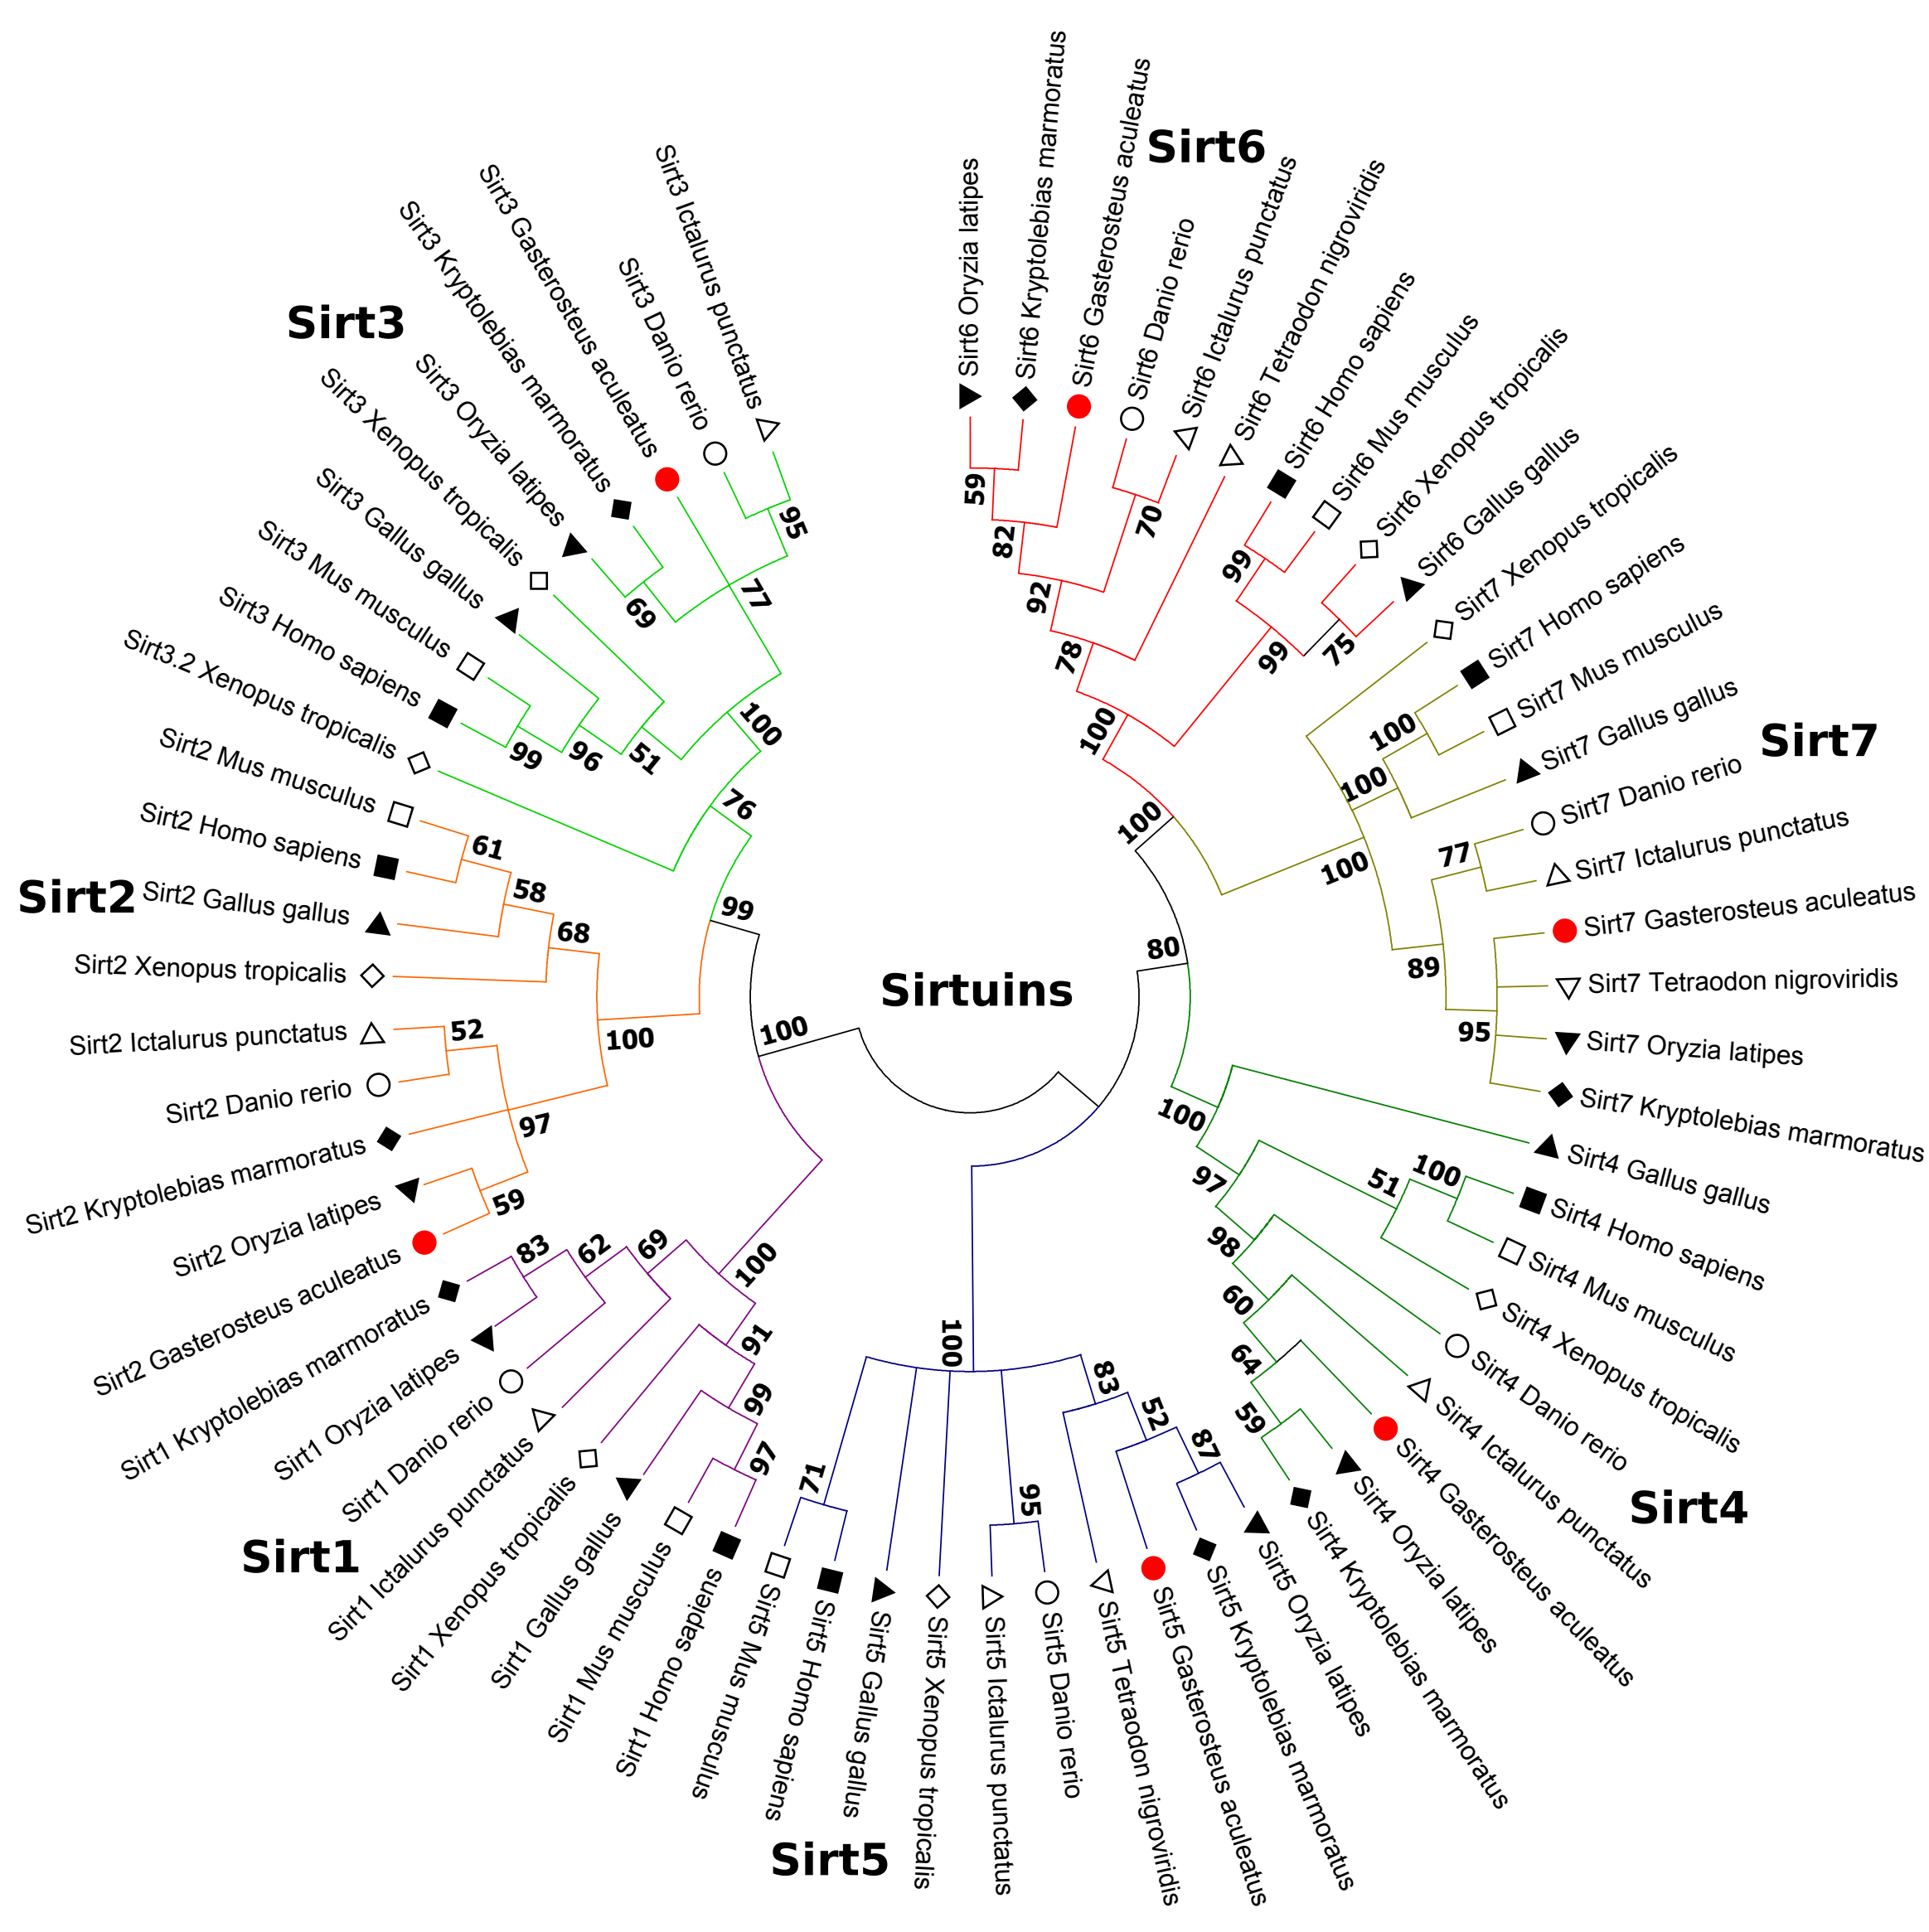

Supplement: Supplementary file 26 [file 18946607]
